# Supplementary material for: A Systems Level, Functional Genomics Analysis of Chronic Epilepsy
Source: PLoS One. 2011 Jun 14;6(6):e20763. doi: 10.1371/journal.pone.0020763 (PMC3114768; doi:10.1371/journal.pone.0020763)
Supplement: Table S1 — Primers used for quantitative RT-PCR. This table shows the primers that were used for quantitative RT-PCR confirmation. The first column shows the gene symbol. The second column shows the genomic location that was targeted. The third column represents the forward primer in 5′→3′ direction. The fourth column represents the reverse primer in 5′→3′ direction. (XLS) [file pone.0020763.s003.xls]

## Sheet: Sheet1
Gene	Location	Forward primer	Reverse primer
Nfe2l2	chr3: 58367152-58367251	acgtgatgaggatgggaaac	atctggcttcttgctcttgg
Hmox1	chr19: 13969803-13969901	tttccccagttctaccagtgt	taaataccacccacccctca
Mag	chr1:85954569-85954711	ttgagaggggtgctctgtct	tcctccaaaggatgggtcta
Klk6	chr1:94258954-94261308	cgacaagagagaagggaacg	ctgtgtaaactcccggcttt
Apod	chr11:903728-907709	cctgtggaaactgccttcat	ctttgtccttcggttgtggt
Rdx	chr8:55449689-55449807	gtgagagggagagacggtca	gtaaaacccgagggaagtcg
Arf1	chr10:45516286-45516376	ggacaggagagaaggtgacg	aatgcaggtgacccaaagac
Ppp2ca	chr10:37640754-37640862	cccgcgttgttctttgttac	ttatgaaaacactgcggtgac
Rab5b	chr7:1980191-1980287	ctcacggccctgaaacatac	ttcactcagagtctccacttgc
Ppm1a1	chr6:95198676-95198818	tgggtgagggactacagctt	caacaaaaattgctggagtctg
Pam	chr9:97043365-97043469	ggagtgtccgtggttctcat	atctccaaaggcccttgatt
