# Supplementary material for: A Systems Level, Functional Genomics Analysis of Chronic Epilepsy
Source: PLoS One. 2011 Jun 14;6(6):e20763. doi: 10.1371/journal.pone.0020763 (PMC3114768; doi:10.1371/journal.pone.0020763)
Supplement: Table S4 — Differentially expressed genes due to the lesion in animals without seizures. This table summarizes the genes that are differentially expressed between the lesioned and non-lesioned hippocampi in animals without seizures. The gene symbols, gene names, and Refseq identifiers are shown in the first column. The probe on the Agilent platform and the fold change and differential expression p-value for that probe is shown in the fourth, fifth, and sixth columns. The probe on the Codelink platform and the fold change and differential expression p-value for that probe is shown in the seventh, eighth, and ninth columns. (XLS) [file pone.0020763.s006.xls]

## Sheet: Sheet1
Symbol	Gene Name	RefSeq	Agilent	Agi_fc	Agi_pv	Codelink	Cod_fc	Cod_pv
TF	TRANSFERRIN	NM_001013110	A_43_P11796	0.949294	0.000501374	GE1227220	0.805	0.0002
LOC498872	SIMILAR TO INTERFERON-INDUCIBLE GTPASE	NM_001012353	A_42_P778782	0.518548	0.00387077	GE1294992	1.317	0.0001
S100A4	S100 CALCIUM-BINDING PROTEIN A4	NM_012618	A_43_P11489	1.60427	4.27978e-05	GE19865	2.377	9.01e-05
SPP1	SECRETED PHOSPHOPROTEIN 1	NM_012881	A_43_P11602	1.3653	0.000570608	GE20032	3.32	0.0002
GFAP	GLIAL FIBRILLARY ACIDIC PROTEIN	NM_017009	A_43_P11773	1.27379	1.99109e-06	GE1283392	1.281	0.0002
GFAP	GLIAL FIBRILLARY ACIDIC PROTEIN	NM_017009	A_43_P11773	1.27379	1.99109e-06	GE1283392	1.281	0.0002
SERPING1	SERINE (OR CYSTEINE) PEPTIDASE INHIBITOR, CLADE G, MEMBER 1	NM_199093	A_42_P510386	1.3507	9.04539e-05	GE16641	3.132	9.52e-05
GSTA3	GLUTATHIONE S-TRANSFERASE A3	NM_031509	A_43_P12568	0.729984	3.83444e-06	GE13354	0.656	0.0009
LCAT	LECITHIN CHOLESTEROL ACYLTRANSFERASE	NM_017024	A_43_P15264	0.710032	0.00126444	GE20282	1.356	3.36e-05
A2M	ALPHA-2-MACROGLOBULIN	NM_012488	A_43_P14162	0.96872	0.00033794	GE21634	0.995	0.0002
SGCG	GAMMA SARCOGLYCAN	NM_001006993	A_42_P743601	0.232722	0.030821	GE1223550	2.008	0.0002
SCN7A	SODIUM CHANNEL, VOLTAGE-GATED, TYPE 6, ALPHA POLYPEPTIDE	NM_031686	A_42_P804822	0.306552	0.00990636	GE21193	4.268	7.53e-05
RT1-A2	RT1 CLASS IB, LOCUS AW2	NM_012645	A_43_P11501	0.650699	0.000441441	GE1136694	0.993	0.0002
VIM	VIMENTIN	NM_031140	A_42_P509365	0.694054	0.00688587	GE22154	2.133	2.22e-05
TAGLN	TRANSGELIN	NM_031549	A_43_P12581	0.285652	0.0672998	GE19749	1.277	0.0002
F13A1	COAGULATION FACTOR XIII, A1 SUBUNIT	NM_021698	A_43_P12107	0.0777453	0.102242	GE18298	1.202	0.0002
CHRNA7	CHOLINERGIC RECEPTOR, NICOTINIC, ALPHA POLYPEPTIDE 7	NM_012832	A_42_P825460	-0.24038	0.0845681	GE1104649	-0.667	0.0002
EMP3	EPITHELIAL MEMBRANE PROTEIN 3	NM_030847	A_42_P517399	0.298962	0.00453928	GE1120759	0.881	3.85e-05
SERPING1	SERINE (OR CYSTEINE) PEPTIDASE INHIBITOR, CLADE G, MEMBER 1	NM_199093	A_43_P16428	-0.00671603	0.919675	GE16641	3.132	9.52e-05
GSN	GELSOLIN	NM_001004080	A_43_P10899	NA	NA	GE1306001	1.06	0.0002
HSPB8	HEAT SHOCK 22KDA PROTEIN 8	NM_053612	A_43_P12870	0.0461089	0.617303	GE16019	0.608	0.0002
GSTA3	GLUTATHIONE S-TRANSFERASE A3	NM_031509	A_43_P12568	0.729984	3.83444e-06	GE1112235	NA	NA
HSPB1	HEAT SHOCK 27KDA PROTEIN 1	NM_031970	NA	NA	NA	GE1108671	1.31	0.0002
CP	CERULOPLASMIN	NM_012532	A_43_P11448	0.168084	0.0404453	GE19806	1.848	6.41e-05
PTPRD	PROTEIN TYROSINE PHOSPHATASE, RECEPTOR TYPE, D	NM_019140	NA	NA	NA	GE1194593	1.679	0.0002
CAPG	CAPPING PROTEIN (ACTIN FILAMENT), GELSOLIN-LIKE	NM_001013086	NA	NA	NA	GE17580	1.321	0.0001
ID3	INHIBITOR OF DNA BINDING 3	NM_013058	NA	NA	NA	GE21288	0.779	0.0001
