# Supplementary material for: A Systems Level, Functional Genomics Analysis of Chronic Epilepsy
Source: PLoS One. 2011 Jun 14;6(6):e20763. doi: 10.1371/journal.pone.0020763 (PMC3114768; doi:10.1371/journal.pone.0020763)
Supplement: Table S5 — Differentially expressed genes due to the lesion in animals with seizures. This table summarizes the genes that are differentially expressed between the lesioned and non-lesioned hippocampi in animals with seizures. The gene symbols, gene names, and Refseq identifiers are shown in the first column. The probe on the Agilent platform and the fold change and differential expression p-value for that probe is shown in the fourth, fifth, and sixth columns. The probe on the Codelink platform and the fold change and differential expression p-value for that probe is shown in the seventh, eighth, and ninth columns. (XLS) [file pone.0020763.s007.xls]

## Sheet: Sheet1
Symbol	Gene.Name	RefSeq	Agilent	Agi_fc	Agi_pv	Codelink	Cod_fc	Cod_pv
PENK1	PREPROENKEPHALIN, RELATED SEQUENCE	NM_017139	A_43_P11835	0.911005	0.00175902	GE20368	0.0100637	0.9684
GPR88	G-PROTEIN COUPLED RECEPTOR 88	NM_031696	A_42_P709638	0.516898	0.00188676	GE13127	0.661932	0.1299
CBLN2	CEREBELLIN 2 PRECURSOR PROTEIN	NM_001012740	A_42_P542985	0.774805	0.00278258	GE12346	0.895923	0.1066
TF	TRANSFERRIN	NM_001013110	A_43_P11796	1.27062	9.74015e-06	GE1227220	1.48114	5.34e-05
TF	TRANSFERRIN	NM_001013110	A_43_P11796	1.27062	9.74015e-06	GE1227220	1.48114	5.34e-05
RGD1308367	SIMILAR TO KIAA1189 PROTEIN	NM_001008311	A_42_P779687	1.0805	9.30006e-07	GE1221228	1.21909	0.0007
RGD1308367	SIMILAR TO KIAA1189 PROTEIN	NM_001008311	A_42_P779687	1.0805	9.30006e-07	GE1221228	1.21909	0.0007
GAA	GLUCOSIDASE, ALPHA, ACID	NM_199118	A_42_P750500	0.391822	0.0022544	GE1178502	0.142871	0.2793
PLCB4	PHOSPHOLIPASE C, BETA 4	NM_024353	A_42_P537534	0.484608	0.00017717	GE1261902	0.537147	0.0314
IGFBP2	INSULIN-LIKE GROWTH FACTOR BINDING PROTEIN 2	NM_013122	A_42_P581804	0.200316	0.421428	GE21653	1.1157	0.0035
MOG	MYELIN OLIGODENDROCYTE GLYCOPROTEIN	NM_022668	A_43_P12283	0.863365	2.06947e-06	GE1219050	1.00411	0.0003
MOG	MYELIN OLIGODENDROCYTE GLYCOPROTEIN	NM_022668	A_43_P12283	0.863365	2.06947e-06	GE1219050	1.00411	0.0003
QDPR	QUINOID DIHYDROPTERIDINE REDUCTASE	NM_022390	A_43_P12219	0.873838	1.25248e-05	GE1114043	0.772561	0.0012
QDPR	QUINOID DIHYDROPTERIDINE REDUCTASE	NM_022390	A_43_P12219	0.873838	1.25248e-05	GE1114043	0.772561	0.0012
CALB2	CALBINDIN 2	NM_053988	A_42_P698310	0.465884	0.000878128	GE21125	-0.162137	0.3738
LOC498872	SIMILAR TO INTERFERON-INDUCIBLE GTPASE	NM_001012353	A_42_P778782	0.479146	0.00716512	GE1294992	1.58775	0.0013
IGSF1	IMMUNOGLOBULIN SUPERFAMILY, MEMBER 1	NM_175763	A_42_P784294	1.40701	4.67598e-06	GE15392	1.38488	0.0001
IGSF1	IMMUNOGLOBULIN SUPERFAMILY, MEMBER 1	NM_175763	A_42_P784294	1.40701	4.67598e-06	GE15392	1.38488	0.0001
VGF	VGF NERVE GROWTH FACTOR INDUCIBLE	NM_030997	A_43_P15309	0.46932	0.00247491	GE1133266	0.201508	0.2675
IFI30	INTERFERON GAMMA INDUCIBLE PROTEIN 30	NM_001030026	A_42_P468216	0.500865	0.0015962	GE1123294	1.14339	1.92e-05
IFI30	INTERFERON GAMMA INDUCIBLE PROTEIN 30	NM_001030026	A_42_P468216	0.500865	0.0015962	GE1123294	1.14339	1.92e-05
TAC2	TACHYKININ 2	NM_019162	A_42_P503288	-0.750621	0.00275164	GE20559	-0.15859	0.7648
MAWBP	MAWD BINDING PROTEIN	NM_138530	A_43_P13290	0.494801	6.42772e-06	GE1281729	0.8614	0.0055
ITIH3	INTER-ALPHA TRYPSIN INHIBITOR, HEAVY CHAIN 3	NM_017351	A_42_P464378	0.987976	3.12303e-06	GE22198	0.757535	0.0013
ITIH3	INTER-ALPHA TRYPSIN INHIBITOR, HEAVY CHAIN 3	NM_017351	A_42_P464378	0.987976	3.12303e-06	GE22198	0.757535	0.0013
RGD1308367	SIMILAR TO KIAA1189 PROTEIN	NM_001008311	A_42_P779687	1.0805	9.30006e-07	GE1298506	1.16569	0.0005
RGD1308367	SIMILAR TO KIAA1189 PROTEIN	NM_001008311	A_42_P779687	1.0805	9.30006e-07	GE1298506	1.16569	0.0005
PTGS2	PROSTAGLANDIN-ENDOPEROXIDE SYNTHASE 2	NM_017232	A_43_P11872	-0.620354	0.00111521	GE1164547	-0.0549917	0.8354
S100A4	S100 CALCIUM-BINDING PROTEIN A4	NM_012618	A_43_P11489	1.03911	0.00487111	GE19865	2.00813	4.31e-08
S100A4	S100 CALCIUM-BINDING PROTEIN A4	NM_012618	A_43_P11489	1.03911	0.00487111	GE19865	2.00813	4.31e-08
PTPN6	PROTEIN TYROSINE PHOSPHATASE, NON-RECEPTOR TYPE 6	NM_053908	A_42_P471271	0.414848	0.000984562	GE22050	0.869714	0.0003
PTPN6	PROTEIN TYROSINE PHOSPHATASE, NON-RECEPTOR TYPE 6	NM_053908	A_42_P471271	0.414848	0.000984562	GE22050	0.869714	0.0003
SPP1	SECRETED PHOSPHOPROTEIN 1	NM_012881	A_43_P11602	1.34126	0.000691731	GE20032	3.1793	0.0002
SPP1	SECRETED PHOSPHOPROTEIN 1	NM_012881	A_43_P11602	1.34126	0.000691731	GE20032	3.1793	0.0002
NA	NA	NM_001044293	A_42_P750488	0.689507	0.000680883	GE17658	-0.0543923	0.7625
MAL	MYELIN AND LYMPHOCYTE PROTEIN	NM_012798	A_42_P608600	0.460095	0.000241342	GE21956	1.1705	0.0004
MAL	MYELIN AND LYMPHOCYTE PROTEIN	NM_012798	A_42_P608600	0.460095	0.000241342	GE21956	1.1705	0.0004
ACADL	ACETYL-COENZYME A DEHYDROGENASE, LONG-CHAIN	NM_012819	A_43_P14184	0.44884	9.39994e-05	GE19986	0.533563	0.0034
ACADL	ACETYL-COENZYME A DEHYDROGENASE, LONG-CHAIN	NM_012819	A_43_P14184	0.44884	9.39994e-05	GE19986	0.533563	0.0034
RND2	RAS HOMOLOG GENE FAMILY, MEMBER N	NM_001010953	A_42_P774897	0.31064	0.00483098	GE1122960	0.100978	0.5126
SLC6A8	CHOLINE TRANSPORTER	NM_017348	A_42_P781006	0.350032	0.000204419	GE20518	0.508327	0.002
SLC6A8	CHOLINE TRANSPORTER	NM_017348	A_42_P781006	0.350032	0.000204419	GE20518	0.508327	0.002
MAG	MYELIN-ASSOCIATED GLYCOPROTEIN	NM_017190	A_42_P646991	0.779346	1.39848e-05	GE20408	0.496718	0.0055
CNTN2	CONTACTIN 2	NM_012884	A_42_P537158	0.463914	0.000116094	GE20035	0.242328	0.2685
DDAH1	DIMETHYLARGININE DIMETHYLAMINOHYDROLASE 1	NM_022297	A_43_P12207	0.496589	0.000495196	GE1287147	0.176067	0.2446
PLP	PROTEOLIPID PROTEIN	NM_030990	A_42_P741139	1.06491	2.21206e-05	GE19662	0.866948	0.0004
PLP	PROTEOLIPID PROTEIN	NM_030990	A_42_P741139	1.06491	2.21206e-05	GE19662	0.866948	0.0004
RND2	RAS HOMOLOG GENE FAMILY, MEMBER N	NM_001010953	A_42_P774897	0.31064	0.00483098	GE14069	0.1125	0.4286
RGD1308367	SIMILAR TO KIAA1189 PROTEIN	NM_001008311	A_42_P779687	1.0805	9.30006e-07	GE1277198	1.10963	0.001
RGD1308367	SIMILAR TO KIAA1189 PROTEIN	NM_001008311	A_42_P779687	1.0805	9.30006e-07	GE1277198	1.10963	0.001
TLE3	TRANSDUCIN-LIKE ENHANCER OF SPLIT 3, E(SPL) HOMOLOG (DROSOPHILA)	NM_053400	A_42_P550344	0.290537	0.00428944	GE1136048	0.439889	0.0404
GFAP	GLIAL FIBRILLARY ACIDIC PROTEIN	NM_017009	A_43_P11773	0.596403	0.0126672	GE1283392	1.41376	3.15e-08
LR8	LR8 PROTEIN	NM_134390	A_42_P631473	0.591704	0.000295186	GE1305202	0.933573	6.2e-06
LR8	LR8 PROTEIN	NM_134390	A_42_P631473	0.591704	0.000295186	GE1305202	0.933573	6.2e-06
GFRA2	GLIAL CELL LINE DERIVED NEUROTROPHIC FACTOR FAMILY RECEPTOR ALPHA 2	NM_012750	A_42_P791436	0.58354	0.000363328	GE1277792	1.74145	1.73e-06
GFRA2	GLIAL CELL LINE DERIVED NEUROTROPHIC FACTOR FAMILY RECEPTOR ALPHA 2	NM_012750	A_42_P791436	0.58354	0.000363328	GE1277792	1.74145	1.73e-06
GRM4	GLUTAMATE RECEPTOR, METABOTROPIC 4	NM_022666	A_43_P15406	0.111939	0.41573	GE1219128	-0.955676	4.9e-05
G10	MATERNAL G10 TRANSCRIPT	NM_053936	A_42_P794928	0.595006	0.000490671	GE17505	0.501414	0.0114
SAMD14	SIMILAR TO CDNA SEQUENCE BC034054	NM_001024966	A_42_P475582	0.732129	1.03841e-05	GE14541	0.046002	0.842
MAWBP	MAWD BINDING PROTEIN	NM_138530	A_43_P13290	0.494801	6.42772e-06	GE14853	0.909811	0.0055
C3	COMPLEMENT COMPONENT 3	NM_016994	A_42_P500681	0.787135	0.000930522	GE20261	0.996389	0.0011
C3	COMPLEMENT COMPONENT 3	NM_016994	A_42_P500681	0.787135	0.000930522	GE20261	0.996389	0.0011
PPAP2C	PHOSPHATIDIC ACID PHOSPHATASE TYPE 2C	NM_139252	A_43_P15368	0.502323	0.000705857	GE12690	1.21512	0.0002
PPAP2C	PHOSPHATIDIC ACID PHOSPHATASE TYPE 2C	NM_139252	A_43_P15368	0.502323	0.000705857	GE12690	1.21512	0.0002
NPR1	NATRIURETIC PEPTIDE RECEPTOR 1	NM_012613	A_43_P15245	0.489857	1.41762e-05	GE19863	0.676809	0.0055
GAL	GALANIN	NM_033237	A_42_P614175	0.62929	0.0025471	GE19571	-0.206395	0.5305
ACADL	ACETYL-COENZYME A DEHYDROGENASE, LONG-CHAIN	NM_012819	A_43_P14184	0.44884	9.39994e-05	GE21658	0.490365	0.0014
ACADL	ACETYL-COENZYME A DEHYDROGENASE, LONG-CHAIN	NM_012819	A_43_P14184	0.44884	9.39994e-05	GE21658	0.490365	0.0014
C3	COMPLEMENT COMPONENT 3	NM_016994	A_42_P500681	0.787135	0.000930522	GE22123	1.0285	0.0004
C3	COMPLEMENT COMPONENT 3	NM_016994	A_42_P500681	0.787135	0.000930522	GE22123	1.0285	0.0004
APOD	APOLIPOPROTEIN D	NM_012777	A_43_P11558	0.907297	4.3988e-05	GE1126219	1.25882	4.87e-06
APOD	APOLIPOPROTEIN D	NM_012777	A_43_P11558	0.907297	4.3988e-05	GE1126219	1.25882	4.87e-06
GRP	GASTRIN RELEASING PEPTIDE	NM_133570	A_42_P455837	0.52202	0.00454498	GE21791	0.671112	0.0609
PSMB9	PROTEOSOME (PROSOME, MACROPAIN) SUBUNIT, BETA TYPE 9	NM_012708	A_42_P759756	0.383641	0.000455463	GE19916	0.621899	0.0029
PSMB9	PROTEOSOME (PROSOME, MACROPAIN) SUBUNIT, BETA TYPE 9	NM_012708	A_42_P759756	0.383641	0.000455463	GE19916	0.621899	0.0029
SLC30A3	ZINC TRANSPORTER ZNT-3	NM_001013243	A_42_P803391	-0.912847	0.000107002	GE1186903	-0.0473682	0.7267
ACADL	ACETYL-COENZYME A DEHYDROGENASE, LONG-CHAIN	NM_012819	A_42_P783389	0.488814	0.000450239	GE19986	0.533563	0.0034
ACADL	ACETYL-COENZYME A DEHYDROGENASE, LONG-CHAIN	NM_012819	A_42_P783389	0.488814	0.000450239	GE19986	0.533563	0.0034
SLC2A13	SOLUTE CARRIER FAMILY 2 (FACILITATED GLUCOSE TRANSPORTER), MEMBER 13	NM_133611	A_42_P828547	-0.343367	0.0038487	GE16776	-0.239736	0.1577
GAMT	GUANIDINOACETATE METHYLTRANSFERASE	NM_012793	A_43_P11567	0.268657	0.00128292	GE19970	0.472904	0.0101
SPARC	SECRETED ACIDIC CYSTEINE RICH GLYCOPROTEIN	NM_012656	A_42_P669371	0.493233	0.000927466	GE19882	0.40163	0.0087
DLX5	DISTAL-LESS HOMEOBOX 5	NM_012943	A_43_P14887	0.35691	0.00388447	GE1208545	-0.185573	0.1802
PLEKHB1	EVECTIN-1	NM_172033	A_42_P703688	0.508368	0.000237162	GE13306	0.53665	0.0008
PLEKHB1	EVECTIN-1	NM_172033	A_42_P703688	0.508368	0.000237162	GE13306	0.53665	0.0008
TSPAN1	TETRASPAN 1	NM_001004236	A_43_P10290	0.297055	0.00256	GE18020	0.521453	0.0898
CRYAB	CRYSTALLIN, ALPHA B	NM_012935	A_43_P11625	0.54565	4.52649e-05	GE19706	0.915712	0.0013
CRYAB	CRYSTALLIN, ALPHA B	NM_012935	A_43_P11625	0.54565	4.52649e-05	GE19706	0.915712	0.0013
CNTN2	CONTACTIN 2	NM_012884	A_42_P537158	0.463914	0.000116094	GE1227139	0.134089	0.4742
ALDOC	ALDOLASE C, FRUCTOSE-BIPHOSPHATE	NM_012497	A_43_P15520	0.323482	0.00436736	GE19784	0.194339	0.0275
FUCA	FUCOSIDASE, ALPHA-L- 1, TISSUE	NM_012562	A_43_P11466	0.403033	0.000155529	GE19823	0.578504	0.0002
FUCA	FUCOSIDASE, ALPHA-L- 1, TISSUE	NM_012562	A_43_P11466	0.403033	0.000155529	GE19823	0.578504	0.0002
ACADL	ACETYL-COENZYME A DEHYDROGENASE, LONG-CHAIN	NM_012819	A_42_P783389	0.488814	0.000450239	GE21658	0.490365	0.0014
ACADL	ACETYL-COENZYME A DEHYDROGENASE, LONG-CHAIN	NM_012819	A_42_P783389	0.488814	0.000450239	GE21658	0.490365	0.0014
PHYHIP	PHYTANOYL-COA HYDROXYLASE INTERACTING PROTEIN	NM_001017376	A_42_P547785	-0.543809	9.26399e-05	GE1207325	-0.341172	0.1489
SERPING1	SERINE (OR CYSTEINE) PEPTIDASE INHIBITOR, CLADE G, MEMBER 1	NM_199093	A_42_P510386	0.851006	0.00895785	GE16641	2.94323	2.07e-09
PDE8A	PHOSPHODIESTERASE 8A	NM_198767	A_42_P802988	0.530701	1.76995e-05	GE1292495	0.725261	0.0021
PDE8A	PHOSPHODIESTERASE 8A	NM_198767	A_42_P802988	0.530701	1.76995e-05	GE1292495	0.725261	0.0021
BAIAP2	BRAIN-SPECIFIC ANGIOGENESIS INHIBITOR 1-ASSOCIATED PROTEIN 2	NM_057196	A_43_P13057	-0.255072	3.06209e-05	GE15873	-0.127368	0.3042
SCN3B	SODIUM CHANNEL, VOLTAGE-GATED, TYPE III, BETA	NM_139097	A_42_P779282	-0.676241	1.4257e-05	GE19121	-0.304897	0.1074
GEFT	RAC/CDC42 EXCHANGE FACTOR	NM_199395	A_42_P588915	-0.636624	9.97588e-06	GE14063	-0.493703	0.0148
PRG1	PLASTICITY RELATED GENE 1	NM_001001508	A_42_P547215	-0.843509	2.70716e-05	GE19379	-0.100051	0.5355
GSTA3	GLUTATHIONE S-TRANSFERASE A3	NM_031509	A_43_P12568	0.557504	0.000199955	GE13354	0.743817	3.54e-05
GSTA3	GLUTATHIONE S-TRANSFERASE A3	NM_031509	A_43_P12568	0.557504	0.000199955	GE13354	0.743817	3.54e-05
HEXA	HEXOSAMINIDASE A	NM_001004443	A_43_P18983	0.315015	0.000578253	GE12354	0.582941	0.0013
HEXA	HEXOSAMINIDASE A	NM_001004443	A_43_P18983	0.315015	0.000578253	GE12354	0.582941	0.0013
NPR1	NATRIURETIC PEPTIDE RECEPTOR 1	NM_012613	A_43_P15245	0.489857	1.41762e-05	GE22110	0.969086	0.0003
NPR1	NATRIURETIC PEPTIDE RECEPTOR 1	NM_012613	A_43_P15245	0.489857	1.41762e-05	GE22110	0.969086	0.0003
SCN3B	SODIUM CHANNEL, VOLTAGE-GATED, TYPE III, BETA	NM_139097	A_42_P779282	-0.676241	1.4257e-05	GE1274997	-0.136854	0.4047
NPR1	NATRIURETIC PEPTIDE RECEPTOR 1	NM_012613	A_43_P15245	0.489857	1.41762e-05	GE1207254	0.94703	0.0005
NPR1	NATRIURETIC PEPTIDE RECEPTOR 1	NM_012613	A_43_P15245	0.489857	1.41762e-05	GE1207254	0.94703	0.0005
CD82	KANGAI 1	NM_031797	A_42_P739970	0.394855	0.00385109	GE1240266	0.573375	0.0036
CD82	KANGAI 1	NM_031797	A_42_P739970	0.394855	0.00385109	GE1240266	0.573375	0.0036
RGD1306991	SIMILAR TO PROTEIN C20ORF103 PRECURSOR	NM_001014183	A_43_P15047	0.263508	0.176666	GE1111232	-0.602088	0.0012
ZFP179	ZINC FINGER PROTEIN 179	NM_138613	A_42_P758200	-0.487461	0.000126307	GE13257	-0.224486	0.1477
CDC42EP2	CDC42 EFFECTOR PROTEIN (RHO GTPASE BINDING) 2	NM_001009689	A_42_P650470	0.358564	1.36e-05	GE1305778	0.743817	0.0031
CDC42EP2	CDC42 EFFECTOR PROTEIN (RHO GTPASE BINDING) 2	NM_001009689	A_42_P650470	0.358564	1.36e-05	GE1305778	0.743817	0.0031
CD164	CD164 ANTIGEN	NM_031812	A_42_P490755	0.419764	0.000392236	GE1280178	0.380064	0.0076
CHN1	CHIMERIN (CHIMAERIN) 1	NM_032083	A_43_P15576	-0.490832	6.45667e-05	GE21127	-0.134319	0.1195
SLC27A2	SOLUTE CARRIER FAMILY 27 (FATTY ACID TRANSPORTER), MEMBER 2	NM_031736	A_43_P12655	0.262887	0.00135391	GE1248851	0.238909	0.434
SLC20A2	SOLUTE CARRIER FAMILY 20, MEMBER 2	NM_017223	A_43_P10047	0.522448	1.34307e-05	GE15183	0.367595	0.0378
RASSF5	RAS ASSOCIATION (RALGDS/AF-6) DOMAIN FAMILY 5	NM_019365	A_42_P579964	0.350064	0.00535806	GE13149	0.319502	0.042
TMED10	TRANSMEMBRANE TRAFFICKING PROTEIN 21	NM_053467	A_43_P14848	0.570597	6.34044e-06	GE15688	0.570949	0.0004
TMED10	TRANSMEMBRANE TRAFFICKING PROTEIN 21	NM_053467	A_43_P14848	0.570597	6.34044e-06	GE15688	0.570949	0.0004
MS4A6B	MEMBRANE-SPANNING 4-DOMAINS, SUBFAMILY A, MEMBER 6B	NM_001006975	A_43_P17697	0.405775	0.00720533	GE1293642	1.60905	6.16e-06
PTGDS	PROSTAGLANDIN D2 SYNTHASE	NM_013015	A_42_P696500	0.927322	0.00054479	GE20119	1.85348	3.44e-05
PTGDS	PROSTAGLANDIN D2 SYNTHASE	NM_013015	A_42_P696500	0.927322	0.00054479	GE20119	1.85348	3.44e-05
HS3ST2	HEPARAN SULFATE (GLUCOSAMINE) 3-O-SULFOTRANSFERASE 2	NM_181370	A_42_P780613	0.357484	0.00118117	GE1147162	1.94804	0.0038
HS3ST2	HEPARAN SULFATE (GLUCOSAMINE) 3-O-SULFOTRANSFERASE 2	NM_181370	A_42_P780613	0.357484	0.00118117	GE1147162	1.94804	0.0038
CARHSP1	CALCIUM REGULATED HEAT STABLE PROTEIN 1	NM_152790	A_42_P775829	0.549585	8.94774e-05	GE17625	1.1167	0.0001
CARHSP1	CALCIUM REGULATED HEAT STABLE PROTEIN 1	NM_152790	A_42_P775829	0.549585	8.94774e-05	GE17625	1.1167	0.0001
PHYHIP	PHYTANOYL-COA HYDROXYLASE INTERACTING PROTEIN	NM_001017376	A_42_P547785	-0.543809	9.26399e-05	GE15679	-0.290356	0.0397
TYRO3	TYRO3 PROTEIN TYROSINE KINASE 3	NM_017092	A_43_P15227	0.361055	0.00233529	GE20334	0.161049	0.4044
PLCD4	PHOSPHOLIPASE C, DELTA 4	NM_080688	A_42_P656837	0.261637	0.027139	GE20869	0.718877	0.0001
LCAT	LECITHIN CHOLESTEROL ACYLTRANSFERASE	NM_017024	A_43_P15264	0.428837	0.0422712	GE20282	2.1933	1.93e-08
BCL2A1	B-CELL LEUKEMIA/LYMPHOMA 2 RELATED PROTEIN A1	NM_133416	A_43_P13182	0.214726	0.0669891	GE1207712	0.964879	0.0025
CLU	CLUSTERIN	NM_053021	A_42_P538928	0.560283	0.000136337	GE19898	0.797262	5.1e-06
PON2	PARAOXONASE 2	NM_001013082	A_43_P10147	0.226693	0.0164188	GE14158	0.538538	0.001
G10	MATERNAL G10 TRANSCRIPT	NM_053936	A_43_P12986	0.635168	0.000430079	GE17505	0.501414	0.0114
RT1-DA	RT1 CLASS II, LOCUS DA	NM_001008847	A_42_P660872	0.428203	0.0121088	GE21186	1.81869	0.0004
CLDN11	CLAUDIN 11	NM_053457	A_43_P12808	0.436534	0.000309405	GE12749	1.16896	0.0002
CLDN11	CLAUDIN 11	NM_053457	A_43_P12808	0.436534	0.000309405	GE12749	1.16896	0.0002
TMED10	TRANSMEMBRANE TRAFFICKING PROTEIN 21	NM_053467	A_42_P671502	0.52429	6.51278e-05	GE15688	0.570949	0.0004
TMED10	TRANSMEMBRANE TRAFFICKING PROTEIN 21	NM_053467	A_42_P671502	0.52429	6.51278e-05	GE15688	0.570949	0.0004
GGTL3	GAMMA-GLUTAMYLTRANSFERASE-LIKE 3	NM_130423	A_42_P660698	-0.333669	0.000138915	GE15852	-0.338068	0.0212
CYP26B1	CYTOCHROME P450, FAMILY 26, SUBFAMILY B, POLYPEPTIDE 1	NM_181087	A_42_P693964	0.769581	0.00359327	GE17338	1.02191	0.0369
BLNK	B-CELL LINKER	NM_001025767	A_42_P507455	0.459678	0.00156846	GE1232932	0.693855	0.0115
GPC4	SIMILAR TO GLYPICAN 4	NM_001014108	A_42_P547976	-0.672418	0.000335931	GE13839	-0.384772	0.0847
LDHB	LACTATE DEHYDROGENASE B	NM_012595	A_43_P14088	0.230632	0.000513773	GE21898	0.0977456	0.4567
PLLP	TRANSMEMBRANE 4 SUPERFAMILY MEMBER 11	NM_022533	A_42_P491486	0.526852	7.23603e-05	GE22261	0.537644	0.0125
CYB5R2	SIMILAR TO CYTOCHROME B5 REDUCTASE B5R.2	NM_001014244	A_42_P698104	0.590414	5.91273e-05	GE17347	1.38178	3.62e-07
CYB5R2	SIMILAR TO CYTOCHROME B5 REDUCTASE B5R.2	NM_001014244	A_42_P698104	0.590414	5.91273e-05	GE17347	1.38178	3.62e-07
CARHSP1	CALCIUM REGULATED HEAT STABLE PROTEIN 1	NM_152790	A_42_P775829	0.549585	8.94774e-05	GE1105456	0.91831	0.0003
CARHSP1	CALCIUM REGULATED HEAT STABLE PROTEIN 1	NM_152790	A_42_P775829	0.549585	8.94774e-05	GE1105456	0.91831	0.0003
ENTPD2	ECTONUCLEOSIDE TRIPHOSPHATE DIPHOSPHOHYDROLASE 2	NM_172030	A_42_P510638	0.417564	0.000517022	GE13539	0.64865	0.0002
ENTPD2	ECTONUCLEOSIDE TRIPHOSPHATE DIPHOSPHOHYDROLASE 2	NM_172030	A_42_P510638	0.417564	0.000517022	GE13539	0.64865	0.0002
IGSF8	IMMUNOGLOBULIN SUPERFAMILY, MEMBER 8	NM_001014787	A_43_P14103	-0.258105	0.00212367	GE12545	-0.112475	0.4087
RGD1359691	HYPOTHETICAL LOC287534	NM_001007611	A_42_P667000	-0.889566	1.60426e-06	GE1217498	-0.182459	0.3209
CART	COCAINE AND AMPHETAMINE REGULATED TRANSCRIPT	NM_017110	A_42_P636627	-0.458633	0.000128142	GE20347	-0.92139	1.94e-05
CART	COCAINE AND AMPHETAMINE REGULATED TRANSCRIPT	NM_017110	A_42_P636627	-0.458633	0.000128142	GE20347	-0.92139	1.94e-05
NR3C2	NUCLEAR RECEPTOR SUBFAMILY 3, GROUP C, MEMBER 2	NM_013131	A_43_P15261	-0.355698	0.0032428	GE21803	0.0236102	0.8934
RGD1304579	SIMILAR TO 9230105E10RIK PROTEIN	NM_001014023	A_42_P798500	0.252018	0.015526	GE1108771	0.647453	0.0013
CPG2	CPG2 PROTEIN	NM_001029909	A_42_P807826	-0.736439	0.000534461	GE20680	-0.247937	0.0623
RGD1308626	SIMILAR TO 9630044O09RIK PROTEIN	NM_001014139	A_42_P662046	0.541948	5.90329e-05	GE1211904	0.436268	0.0128
NEFL	NEUROFILAMENT, LIGHT POLYPEPTIDE	NM_031783	A_43_P12677	-0.513072	0.000421417	GE13224	-0.127053	0.3672
ANXA2	ANNEXIN A2	NM_019905	A_42_P532103	0.271242	0.0420095	GE20706	0.873104	0.0028
PIB5PA	PHOSPHATIDYLINOSITOL (4,5) BISPHOSPHATE 5-PHOSPHATASE, A	NM_133562	A_42_P760182	-0.493657	8.1691e-05	GE13106	-0.147362	0.2464
FATH	FAT TUMOR SUPPRESSOR HOMOLOG (DROSOPHILA)	NM_031819	A_42_P592144	0.457007	0.00144499	GE13339	0.349931	0.0264
GPC4	SIMILAR TO GLYPICAN 4	NM_001014108	A_42_P547976	-0.672418	0.000335931	GE1242550	-0.246909	0.2093
LAP3	LEUCINE AMINOPEPTIDASE 3	NM_001011910	A_43_P14115	0.631314	3.49547e-05	GE1255725	0.660198	0.0024
LAP3	LEUCINE AMINOPEPTIDASE 3	NM_001011910	A_43_P14115	0.631314	3.49547e-05	GE1255725	0.660198	0.0024
BHLHB2	BASIC HELIX-LOOP-HELIX DOMAIN CONTAINING, CLASS B2	NM_053328	A_43_P12768	0.202433	0.000873811	GE1154285	0.393636	0.0148
TIMP2	TISSUE INHIBITOR OF METALLOPROTEINASE 2	NM_021989	A_43_P12142	0.610635	1.54062e-05	GE21722	0.729705	0.0002
TIMP2	TISSUE INHIBITOR OF METALLOPROTEINASE 2	NM_021989	A_43_P12142	0.610635	1.54062e-05	GE21722	0.729705	0.0002
DCIR3	DENDRITIC CELL INHIBITORY RECEPTOR 3	NM_001005891	A_42_P829324	0.278722	0.0076834	GE18476	0.94703	2.25e-05
ABCG3	ATP-BINDING CASSETTE, SUB-FAMILY G (WHITE), MEMBER 3	NM_001004076	A_42_P561699	0.226142	0.014888	GE1106740	0.603407	0.0009
SLC30A3	ZINC TRANSPORTER ZNT-3	NM_001013243	A_42_P803391	-0.912847	0.000107002	GE1240421	-0.132104	0.4122
TMEM123	SIMILAR TO RIKEN CDNA 2310075C12	NM_001014205	A_42_P598511	0.437687	0.000683645	GE14284	0.83996	7.91e-05
TMEM123	SIMILAR TO RIKEN CDNA 2310075C12	NM_001014205	A_42_P598511	0.437687	0.000683645	GE14284	0.83996	7.91e-05
PRDX4	PEROXIREDOXIN 4	NM_053512	A_42_P476686	0.366488	0.000871169	GE21414	0.461948	0.0054
LOC499749	SIMILAR TO RIKEN CDNA C430004E15	NM_001024309	A_42_P577600	0.48494	0.000244436	GE1258984	0.690641	0.0021
LOC499749	SIMILAR TO RIKEN CDNA C430004E15	NM_001024309	A_42_P577600	0.48494	0.000244436	GE1258984	0.690641	0.0021
PRKWNK1	PROTEIN KINASE, LYSINE DEFICIENT 1	NM_053794	A_42_P742581	0.433435	1.35531e-05	GE1259772	0.333653	0.0108
HSD17B4	HYDROXYSTEROID (17-BETA) DEHYDROGENASE 4	NM_024392	A_43_P12440	0.413747	7.87672e-06	GE1160861	0.451857	0.002
IGSF8	IMMUNOGLOBULIN SUPERFAMILY, MEMBER 8	NM_001014787	A_43_P14103	-0.258105	0.00212367	GE1269586	-0.213571	0.2033
EDNRB	ENDOTHELIN RECEPTOR TYPE B	NM_017333	A_42_P524460	0.439652	0.00546564	GE20507	0.770195	1.47e-05
EDNRB	ENDOTHELIN RECEPTOR TYPE B	NM_017333	A_42_P524460	0.439652	0.00546564	GE20507	0.770195	1.47e-05
S100A1	S100 CALCIUM BINDING PROTEIN A1	NM_001007636	A_43_P15752	0.285849	0.00186541	GE14674	0.620586	0.0005
S100A1	S100 CALCIUM BINDING PROTEIN A1	NM_001007636	A_43_P15752	0.285849	0.00186541	GE14674	0.620586	0.0005
ST3GAL4	ALPHA-2,3-SIALYLTRANSFERASE ST3GAL IV	NM_203337	A_42_P740939	0.402961	0.000137991	GE1105405	0.705137	0.0088
A2M	ALPHA-2-MACROGLOBULIN	NM_012488	A_43_P14162	0.479926	0.0587197	GE21634	1.43429	4.52e-10
APOD	APOLIPOPROTEIN D	NM_012777	A_43_P11558	0.907297	4.3988e-05	GE19962	1.1832	9.83e-06
APOD	APOLIPOPROTEIN D	NM_012777	A_43_P11558	0.907297	4.3988e-05	GE19962	1.1832	9.83e-06
ASPA	ASPARTOACYLASE	NM_024399	A_43_P12442	0.542728	0.000187473	GE13086	0.91265	0.0005
ASPA	ASPARTOACYLASE	NM_024399	A_43_P12442	0.542728	0.000187473	GE13086	0.91265	0.0005
OLFM1	OLFACTOMEDIN 1	NM_053573	A_43_P12855	-0.823916	0.000156965	GE20838	-0.112943	0.445
P2RY6	PYRIMIDINERGIC RECEPTOR P2Y, G-PROTEIN COUPLED, 6	NM_057124	A_42_P814235	0.274918	0.00226334	GE19511	0.500802	0.0051
LAPTM5	LYSOSOMAL-ASSOCIATED PROTEIN TRANSMEMBRANE 5	NM_053538	A_43_P12842	0.305323	0.0133161	GE13135	0.67229	0.0033
VTN	VITRONECTIN	NM_019156	A_43_P14771	0.173813	0.210413	GE21982	1.00295	7.5e-06
PPP1R1A	PROTEIN PHOSPHATASE 1, REGULATORY (INHIBITOR) SUBUNIT 1A	NM_022676	A_43_P12287	-0.552776	0.000309822	GE1282787	-0.0646157	0.6558
ARL11	ADP-RIBOSYLATION FACTOR-LIKE 11	NM_001013433	A_43_P15174	0.407116	0.000387089	GE1126064	1.18764	5.53e-05
ARL11	ADP-RIBOSYLATION FACTOR-LIKE 11	NM_001013433	A_43_P15174	0.407116	0.000387089	GE1126064	1.18764	5.53e-05
PCSK2	PROPROTEIN CONVERTASE SUBTILISIN/KEXIN TYPE 2	NM_012746	A_43_P11544	-0.41839	0.00279251	GE19938	-0.0323887	0.7779
ARPC1B	ACTIN RELATED PROTEIN 2/3 COMPLEX, SUBUNIT 1B	NM_019289	A_43_P12008	0.561581	0.00080144	GE21395	0.661385	0.0045
ARPC1B	ACTIN RELATED PROTEIN 2/3 COMPLEX, SUBUNIT 1B	NM_019289	A_43_P12008	0.561581	0.00080144	GE21395	0.661385	0.0045
RT1-A2	RT1 CLASS IB, LOCUS AW2	NM_012645	A_43_P11501	0.71659	0.000137807	GE1304105	0.623492	0.0012
RT1-A2	RT1 CLASS IB, LOCUS AW2	NM_012645	A_43_P11501	0.71659	0.000137807	GE1304105	0.623492	0.0012
BZRP	BENZODIAZEPINE RECEPTOR, PERIPHERAL	NM_012515	A_42_P544601	0.496792	0.000133944	GE19794	1.17383	1.38e-05
BZRP	BENZODIAZEPINE RECEPTOR, PERIPHERAL	NM_012515	A_42_P544601	0.496792	0.000133944	GE19794	1.17383	1.38e-05
TYROBP	TYRO PROTEIN TYROSINE KINASE BINDING PROTEIN	NM_212525	A_42_P807697	0.50463	6.47464e-05	GE13920	0.949348	6.14e-05
TYROBP	TYRO PROTEIN TYROSINE KINASE BINDING PROTEIN	NM_212525	A_42_P807697	0.50463	6.47464e-05	GE13920	0.949348	6.14e-05
NNAT	NEURONATIN	NM_053601	A_42_P542412	0.452326	0.00121789	GE20850	0.19497	0.2331
GPD1	GLYCEROL-3-PHOSPHATE DEHYDROGENASE 1 (SOLUBLE)	NM_022215	A_42_P480224	0.315106	0.0010069	GE1166453	0.747516	0.0073
PPP1R14A	PROTEIN PHOSPHATASE 1, REGULATORY (INHIBITOR) SUBUNIT 14A	NM_130403	A_42_P766909	0.623502	9.03215e-07	GE13599	1.08161	0.0001
PPP1R14A	PROTEIN PHOSPHATASE 1, REGULATORY (INHIBITOR) SUBUNIT 14A	NM_130403	A_42_P766909	0.623502	9.03215e-07	GE13599	1.08161	0.0001
CCNG1	CYCLIN G1	NM_012923	A_43_P11620	-0.338677	0.00146858	GE22179	0.0353424	0.7599
NA	NA	NM_001044287	A_42_P669572	0.810486	1.13962e-05	GE14269	0.919988	9.89e-05
CTSB	CATHEPSIN B	NM_022597	A_43_P15292	0.402484	0.000536799	GE1184511	0.302407	0.0005
CTSB	CATHEPSIN B	NM_022597	A_43_P15292	0.402484	0.000536799	GE1184511	0.302407	0.0005
ARPC1B	ACTIN RELATED PROTEIN 2/3 COMPLEX, SUBUNIT 1B	NM_019289	A_43_P12008	0.561581	0.00080144	GE20638	0.818523	0.0003
ARPC1B	ACTIN RELATED PROTEIN 2/3 COMPLEX, SUBUNIT 1B	NM_019289	A_43_P12008	0.561581	0.00080144	GE20638	0.818523	0.0003
RT1-A2	RT1 CLASS IB, LOCUS AW2	NM_012645	A_43_P11501	0.71659	0.000137807	GE1110010	0.984115	6.78e-05
RT1-A2	RT1 CLASS IB, LOCUS AW2	NM_012645	A_43_P11501	0.71659	0.000137807	GE1110010	0.984115	6.78e-05
IFNGR1	INTERFERON GAMMA RECEPTOR 1	NM_053783	A_42_P658552	0.294244	0.000752415	GE21481	0.324926	0.0078
GAP43	GROWTH ASSOCIATED PROTEIN 43	NM_017195	A_42_P833045	0.560516	0.0177032	GE20412	-0.590745	0.0016
RGD1305117	SIMILAR TO HN1-LIKE PROTEIN	NM_001013182	A_42_P679433	0.146271	0.00526913	GE18038	0.612777	0.0025
DEGS1	DEGENERATIVE SPERMATOCYTE HOMOLOG (DROSOPHILA)	NM_053323	A_43_P12764	0.205049	0.00497288	GE14518	0.151079	0.1999
PRG1	PLASTICITY RELATED GENE 1	NM_001001508	A_42_P547215	-0.843509	2.70716e-05	GE1201262	-0.0363779	0.7259
SLC2A5	SOLUTE CARRIER FAMILY 2, MEMBER 5	NM_031741	A_43_P15380	0.356143	0.000485712	GE19467	0.560128	0.004
CATNA1	CATENIN (CADHERIN-ASSOCIATED PROTEIN), ALPHA 1, 102KDA	NM_001007145	A_42_P669549	0.519825	1.6135e-05	GE1249788	0.515107	0.0003
CATNA1	CATENIN (CADHERIN-ASSOCIATED PROTEIN), ALPHA 1, 102KDA	NM_001007145	A_42_P669549	0.519825	1.6135e-05	GE1249788	0.515107	0.0003
FOS	FBJ MURINE OSTEOSARCOMA VIRAL ONCOGENE HOMOLOG	NM_022197	A_42_P552092	0.485025	1.84621e-05	GE16552	0.536749	0.0297
RDX	RADIXIN	NM_001005889	A_42_P774728	0.499726	0.000167071	GE1236169	0.600365	0.0002
RDX	RADIXIN	NM_001005889	A_42_P774728	0.499726	0.000167071	GE1236169	0.600365	0.0002
HMOX1	HEME OXYGENASE (DECYCLING) 1	NM_012580	A_42_P652275	0.483497	0.00018822	GE19836	0.739675	0.0013
HMOX1	HEME OXYGENASE (DECYCLING) 1	NM_012580	A_42_P652275	0.483497	0.00018822	GE19836	0.739675	0.0013
LOC652955	GOLIATH	NM_001037658	A_42_P548921	0.583467	6.84121e-05	GE15099	0.792855	4.65e-05
LOC652955	GOLIATH	NM_001037658	A_42_P548921	0.583467	6.84121e-05	GE15099	0.792855	4.65e-05
CSRP2	CYSTEINE AND GLYCINE-RICH PROTEIN 2	NM_177425	A_42_P727191	0.209263	0.0622316	GE20941	0.449112	0.0045
GPD1	GLYCEROL-3-PHOSPHATE DEHYDROGENASE 1 (SOLUBLE)	NM_022215	A_42_P480224	0.315106	0.0010069	GE1192413	0.506196	0.0363
C2	COMPLEMENT COMPONENT 2	NM_172222	A_42_P484186	0.334925	0.00507587	GE17071	1.26159	1.05e-05
C2	COMPLEMENT COMPONENT 2	NM_172222	A_42_P484186	0.334925	0.00507587	GE17071	1.26159	1.05e-05
BDNF	BRAIN DERIVED NEUROTROPHIC FACTOR	NM_012513	A_42_P552037	-0.786668	0.000178362	GE1141171	-0.797112	0.0052
TYRO3	TYRO3 PROTEIN TYROSINE KINASE 3	NM_017092	A_42_P674860	0.404692	0.000178547	GE20334	0.161049	0.4044
CCNG1	CYCLIN G1	NM_012923	A_43_P11620	-0.338677	0.00146858	GE1234535	-0.0539429	0.6116
RGD1306991	SIMILAR TO PROTEIN C20ORF103 PRECURSOR	NM_001014183	A_43_P23179	0.112696	0.178615	GE1111232	-0.602088	0.0012
NELF	NASAL EMBRYONIC LHRH FACTOR	NM_057190	A_42_P582963	-0.616317	2.02484e-05	GE1282959	-0.11904	0.1481
TYRO3	TYRO3 PROTEIN TYROSINE KINASE 3	NM_017092	A_43_P15227	0.361055	0.00233529	GE1152599	0.136716	0.4599
SGCG	GAMMA SARCOGLYCAN	NM_001006993	A_42_P743601	0.275995	0.0113643	GE1223550	2.11547	2.32e-06
DECR1	2,4-DIENOYL COA REDUCTASE 1, MITOCHONDRIAL	NM_057197	A_43_P14197	0.309472	0.000712742	GE19454	0.385707	0.0015
DECR1	2,4-DIENOYL COA REDUCTASE 1, MITOCHONDRIAL	NM_057197	A_43_P14197	0.309472	0.000712742	GE19454	0.385707	0.0015
CCNG1	CYCLIN G1	NM_012923	A_43_P11620	-0.338677	0.00146858	GE20061	0.0710762	0.5963
SCN7A	SODIUM CHANNEL, VOLTAGE-GATED, TYPE 6, ALPHA POLYPEPTIDE	NM_031686	A_42_P804822	0.319754	0.00735032	GE21193	4.70191	1.23e-09
SLC17A7	SOLUTE CARRIER FAMILY 17 (SODIUM-DEPENDENT INORGANIC PHOSPHATE COTRANSPORTER), MEMBER 7	NM_053859	A_43_P12962	-0.417841	0.000360073	GE20847	-0.152965	0.3011
PADI2	PEPTIDYL ARGININE DEIMINASE, TYPE II	NM_017226	A_42_P499767	0.684505	3.79937e-05	GE1204676	0.895458	1.99e-05
PADI2	PEPTIDYL ARGININE DEIMINASE, TYPE II	NM_017226	A_42_P499767	0.684505	3.79937e-05	GE1204676	0.895458	1.99e-05
LAPTM5	LYSOSOMAL-ASSOCIATED PROTEIN TRANSMEMBRANE 5	NM_053538	A_43_P12842	0.305323	0.0133161	GE12766	0.70044	0.001
CRIP2	CYSTEINE-RICH PROTEIN 2	NM_022501	A_43_P12227	0.464203	4.45568e-05	GE1274638	0.318693	0.0096
NTRK3	NEUROTROPHIC TYROSINE KINASE, RECEPTOR, TYPE 3	NM_019248	A_43_P11992	-0.364592	0.000583711	GE20612	-0.138283	0.2493
PIB5PA	PHOSPHATIDYLINOSITOL (4,5) BISPHOSPHATE 5-PHOSPHATASE, A	NM_133562	A_42_P760182	-0.493657	8.1691e-05	GE1275592	-0.121549	0.3274
CDW92	CDW92 ANTIGEN	NM_001033852	A_42_P657606	0.714763	3.65984e-06	GE12321	0.328377	0.0166
GPX1	GLUTATHIONE PEROXIDASE 1	NM_030826	A_42_P805300	0.243672	0.00665467	GE1222528	0.392867	0.004
GSTM5	GLUTATHIONE S-TRANSFERASE, MU 5	NM_172038	A_42_P456915	0.351557	0.0170158	GE22063	0.445833	0.0017
LDHB	LACTATE DEHYDROGENASE B	NM_012595	A_43_P14088	0.230632	0.000513773	GE19848	0.0517201	0.584
SLC12A2	SOLUTE CARRIER FAMILY 12, MEMBER 2	NM_031798	A_42_P742882	0.498934	9.59276e-05	GE21358	0.547746	0.0019
SLC12A2	SOLUTE CARRIER FAMILY 12, MEMBER 2	NM_031798	A_42_P742882	0.498934	9.59276e-05	GE21358	0.547746	0.0019
GAP43	GROWTH ASSOCIATED PROTEIN 43	NM_017195	A_42_P833045	0.560516	0.0177032	GE22094	-0.671164	0.0011
CYBRD1	CYTOCHROME B REDUCTASE 1	NM_001011954	A_43_P14622	0.205448	0.0562293	GE13677	0.660381	0.0004
TEP1	TELOMERASE ASSOCIATED PROTEIN 1	NM_022591	A_43_P14844	0.354968	0.000526744	GE22067	0.582267	0.0029
TEP1	TELOMERASE ASSOCIATED PROTEIN 1	NM_022591	A_43_P14844	0.354968	0.000526744	GE22067	0.582267	0.0029
ANKRD13	ANKYRIN REPEAT DOMAIN 13	NM_001012148	A_42_P499273	0.347249	0.000928426	GE17559	0.418676	0.0027
ANKRD13	ANKYRIN REPEAT DOMAIN 13	NM_001012148	A_42_P499273	0.347249	0.000928426	GE17559	0.418676	0.0027
ECE1	ENDOTHELIN CONVERTING ENZYME 1	NM_053596	A_42_P839121	0.263854	0.00209337	GE21591	0.196103	0.1857
G10	MATERNAL G10 TRANSCRIPT	NM_053936	A_42_P794928	0.595006	0.000490671	GE13320	0.360196	0.1127
RPS3A	RIBOSOMAL PROTEIN S3A	NM_017153	A_42_P504090	0.264947	0.000269606	GE20379	0.156267	0.0582
TYRO3	TYRO3 PROTEIN TYROSINE KINASE 3	NM_017092	A_42_P674860	0.404692	0.000178547	GE1152599	0.136716	0.4599
SCAMP2	SECRETORY CARRIER MEMBRANE PROTEIN 2	NM_023955	A_43_P10923	0.365254	0.00826178	GE12306	0.562279	0.003
RXRG	RETINOID X RECEPTOR GAMMA	NM_031765	A_43_P15844	0.0714325	0.404094	GE21319	-0.607793	0.0039
RPS3A	RIBOSOMAL PROTEIN S3A	NM_017153	A_43_P14247	0.312749	0.000185716	GE20379	0.156267	0.0582
SPSB2	GENE RICH CLUSTER, C9 GENE	NM_001009660	A_42_P463844	0.314181	0.00199299	GE1131878	0.646347	0.0003
SPSB2	GENE RICH CLUSTER, C9 GENE	NM_001009660	A_42_P463844	0.314181	0.00199299	GE1131878	0.646347	0.0003
ACSBG1	LIPIDOSIN	NM_134389	A_43_P13257	0.28863	0.00023417	GE1184652	0.276794	0.0341
GRIK5	GLUTAMATE RECEPTOR, IONOTROPIC, KAINATE 5	NM_017262	A_43_P11887	-0.304648	0.000797534	GE20456	-0.238204	0.1001
LAP3	LEUCINE AMINOPEPTIDASE 3	NM_001011910	A_43_P16921	0.339393	0.00099782	GE1255725	0.660198	0.0024
LAP3	LEUCINE AMINOPEPTIDASE 3	NM_001011910	A_43_P16921	0.339393	0.00099782	GE1255725	0.660198	0.0024
SMPDL3A	ACID SPHINGOMYELINASE-LIKE PHOSPHODIESTERASE 3A	NM_001005539	A_42_P502489	0.337887	0.00370635	GE18126	0.671656	0.0008
SMPDL3A	ACID SPHINGOMYELINASE-LIKE PHOSPHODIESTERASE 3A	NM_001005539	A_42_P502489	0.337887	0.00370635	GE18126	0.671656	0.0008
CTSD	CATHEPSIN D	NM_134334	A_43_P13241	0.553566	7.49579e-05	GE1208880	0.662114	0.0005
CTSD	CATHEPSIN D	NM_134334	A_43_P13241	0.553566	7.49579e-05	GE1208880	0.662114	0.0005
NT5E	5 NUCLEOTIDASE	NM_021576	A_42_P702198	0.282218	0.00640588	GE20739	0.762987	0.0028
CPG2	CPG2 PROTEIN	NM_001029909	A_42_P807826	-0.736439	0.000534461	GE16192	-0.29956	0.0932
NELF	NASAL EMBRYONIC LHRH FACTOR	NM_057190	A_42_P582963	-0.616317	2.02484e-05	GE15728	-0.122491	0.1636
VTN	VITRONECTIN	NM_019156	A_43_P14771	0.173813	0.210413	GE20554	1.07341	3.17e-06
WASF1	WAS PROTEIN FAMILY, MEMBER 1	NM_001025114	A_42_P546700	-0.508699	0.000761349	GE18322	-0.131787	0.3179
RT1-A2	RT1 CLASS IB, LOCUS AW2	NM_012645	A_43_P11501	0.71659	0.000137807	GE1136694	1.02105	4.06e-06
RT1-A2	RT1 CLASS IB, LOCUS AW2	NM_012645	A_43_P11501	0.71659	0.000137807	GE1136694	1.02105	4.06e-06
LAMB2	LAMININ, BETA 2	NM_012974	A_43_P11640	0.333453	0.00536976	GE1287675	0.8024	0.0002
LAMB2	LAMININ, BETA 2	NM_012974	A_43_P11640	0.333453	0.00536976	GE1287675	0.8024	0.0002
VIM	VIMENTIN	NM_031140	A_42_P509365	0.927318	0.000478315	GE22154	2.06233	1.76e-09
VIM	VIMENTIN	NM_031140	A_42_P509365	0.927318	0.000478315	GE22154	2.06233	1.76e-09
TJP2	TIGHT JUNCTION PROTEIN 2	NM_053773	A_42_P676364	0.287832	0.00618793	GE1196990	0.551787	0.0013
PALMD	PALMDELPHIN	NM_001025688	A_42_P667862	-0.364792	0.00104806	GE14785	-0.492484	0.0107
MGST1	MICROSOMAL GLUTATHIONE S-TRANSFERASE 1	NM_134349	A_42_P567189	0.355879	0.0114307	GE21645	0.770026	0.0001
DBI	DIAZEPAM BINDING INHIBITOR	NM_031853	A_42_P638374	0.492196	0.000127699	GE1171596	0.528971	0.0001
STX4A	SYNTAXIN 4A (PLACENTAL)	NM_031125	A_43_P12528	0.346927	0.00487236	GE19631	0.288299	0.0672
TUBB6	SIMILAR TO RIKEN CDNA 2310057H16	NM_001025675	A_42_P768467	0.285612	0.0297068	GE1106781	0.910426	3.63e-05
NA	NA	NM_001080150	A_42_P706844	0.443297	0.000279124	GE16700	1.05644	0.0002
RGD1304579	SIMILAR TO 9230105E10RIK PROTEIN	NM_001014023	A_42_P798500	0.252018	0.015526	GE12877	0.682394	0.0003
SCAP2	SRC FAMILY ASSOCIATED PHOSPHOPROTEIN 2	NM_130413	A_43_P13111	0.467516	6.86567e-05	GE13685	0.579277	0.0047
SCAP2	SRC FAMILY ASSOCIATED PHOSPHOPROTEIN 2	NM_130413	A_43_P13111	0.467516	6.86567e-05	GE13685	0.579277	0.0047
RXRA	RETINOID X RECEPTOR ALPHA	NM_012805	A_42_P717482	0.374897	0.000192605	GE1177132	0.220949	0.2838
FABP7	FATTY ACID BINDING PROTEIN 7, BRAIN	NM_030832	A_43_P12450	0.479249	0.00459804	GE20835	0.703987	1.98e-05
FABP7	FATTY ACID BINDING PROTEIN 7, BRAIN	NM_030832	A_43_P12450	0.479249	0.00459804	GE20835	0.703987	1.98e-05
STXBP3	SYNTAXIN BINDING PROTEIN 3	NM_053637	A_42_P774878	0.452443	4.16114e-05	GE13134	0.441377	0.0098
SERPINF1	SERINE (OR CYSTEINE) PROTEINASE INHIBITOR, CLADE F), MEMBER 1	NM_177927	A_42_P709525	0.19862	0.253517	GE1180452	1.37122	0.0001
LYZ	LYSOZYME	NM_012771	A_43_P10020	0.359777	0.000294887	GE19957	0.435309	0.0184
ZFP36L1	ZINC FINGER PROTEIN 36, C3H TYPE-LIKE 1	NM_017172	A_43_P11846	0.119555	0.104947	GE22125	0.694747	5.59e-05
AMPD3	ADENOSINE MONOPHOSPHATE DEAMINASE 3	NM_031544	A_42_P610788	0.326634	0.00163383	GE21063	0.223793	0.1475
LRRN3	LEUCINE RICH REPEAT PROTEIN 3, NEURONAL	NM_030856	A_43_P12460	-0.341831	1.86758e-05	GE13559	-0.363457	0.0224
CDH13	CADHERIN 13	NM_138889	A_42_P749820	-0.269046	0.00439204	GE1223994	-0.0961904	0.5441
CACNB3	CALCIUM CHANNEL, VOLTAGE-DEPENDENT, BETA 3 SUBUNIT	NM_012828	A_43_P14187	-0.285406	0.00370801	GE19992	-0.324274	0.0234
TBXAS1	THROMBOXANE A SYNTHASE 1	NM_012687	A_42_P823722	0.229931	0.00978821	GE21589	0.759582	0.0006
CHRM3	CHOLINERGIC RECEPTOR, MUSCARINIC 3	NM_012527	A_42_P455531	-0.254459	0.0707301	GE19802	-0.643856	0.0022
GBP2	GUANYLATE NUCLEOTIDE BINDING PROTEIN 2	NM_133624	A_42_P793024	0.232469	0.0229562	GE19742	1.51364	7.72e-06
AMPD3	ADENOSINE MONOPHOSPHATE DEAMINASE 3	NM_031544	A_42_P610788	0.326634	0.00163383	GE1184706	0.245252	0.0309
CNN3	CALPONIN 3, ACIDIC	NM_019359	A_42_P761125	0.54011	6.31823e-05	GE21897	0.524966	0.0022
CNN3	CALPONIN 3, ACIDIC	NM_019359	A_42_P761125	0.54011	6.31823e-05	GE21897	0.524966	0.0022
RGD1308212	HYPOTHETICAL LOC287466	NM_001024234	A_42_P478451	0.40229	9.43796e-06	GE1215166	0.413919	0.033
NFE2L2	NUCLEAR FACTOR, ERYTHROID DERIVED 2, LIKE 2	NM_031789	A_42_P541213	0.482855	0.000213308	GE13241	0.639047	7.84e-05
NFE2L2	NUCLEAR FACTOR, ERYTHROID DERIVED 2, LIKE 2	NM_031789	A_42_P541213	0.482855	0.000213308	GE13241	0.639047	7.84e-05
SDC4	SYNDECAN 4	NM_012649	A_42_P687190	0.362806	0.00596417	GE1192382	0.639788	9.97e-05
SDC4	SYNDECAN 4	NM_012649	A_42_P687190	0.362806	0.00596417	GE1192382	0.639788	9.97e-05
CACNB3	CALCIUM CHANNEL, VOLTAGE-DEPENDENT, BETA 3 SUBUNIT	NM_012828	A_42_P783520	-0.30089	0.000199964	GE19992	-0.324274	0.0234
LPL	LIPOPROTEIN LIPASE	NM_012598	A_43_P11479	-0.0214007	0.924224	GE1301531	-0.915391	0.0042
STOM	STOMATIN	NM_001011965	A_42_P469564	0.119978	0.00803669	GE1161426	1.02538	3.86e-05
GPC4	SIMILAR TO GLYPICAN 4	NM_001014108	A_43_P21658	-0.270097	0.000500334	GE13839	-0.384772	0.0847
VCAM1	VASCULAR CELL ADHESION MOLECULE 1	NM_012889	A_42_P499158	0.435139	0.000706256	GE21849	0.210638	0.1319
CNKSR3	MEMBRANE ASSOCIATED GUANYLATE KINASE INTERACTING PROTEIN-LIKE 1	NM_001012061	A_42_P477632	0.279099	0.00194324	GE1120242	0.502636	0.0029
CNKSR3	MEMBRANE ASSOCIATED GUANYLATE KINASE INTERACTING PROTEIN-LIKE 1	NM_001012061	A_42_P477632	0.279099	0.00194324	GE1120242	0.502636	0.0029
SH3BP5	SH3-DOMAIN BINDING PROTEIN 5 (BTK-ASSOCIATED)	NM_054011	A_42_P473292	-0.503753	5.90278e-05	GE1121741	-0.159718	0.2976
CD53	CD53 ANTIGEN	NM_012523	A_43_P11446	0.191317	0.0925019	GE19799	0.704164	0.001
CHGB	CHROMOGRANIN B	NM_012526	A_42_P485961	-0.327717	0.000922022	GE19801	-0.121863	0.3424
LAMP1	LYSOSOMAL MEMBRANE GLYCOPROTEIN 1	NM_012857	A_42_P526083	0.363469	0.00126248	GE20013	0.374288	0.0058
FKBP5	FK506 BINDING PROTEIN 5	NM_001012174	A_42_P493879	-0.268622	0.000551298	GE19218	-0.10067	0.6336
TEP1	TELOMERASE ASSOCIATED PROTEIN 1	NM_022591	A_42_P544167	NA	NA	GE22067	0.582267	0.0029
BRINP2	BMP/RETINOIC ACID-INDUCIBLE NEURAL-SPECIFIC PROTEIN 2	NM_173115	A_42_P828538	-0.279489	0.000916599	GE1125426	-0.186557	0.1114
F13A1	COAGULATION FACTOR XIII, A1 SUBUNIT	NM_021698	A_43_P12107	0.102215	0.0337962	GE1117365	1.98503	1.35e-05
S100A3	S100 CALCIUM BINDING PROTEIN A3	NM_053681	A_43_P12895	0.397527	0.0113478	GE1129316	0.82985	9.2e-05
PTPRF	PROTEIN TYROSINE PHOSPHATASE, RECEPTOR TYPE, F	NM_019249	A_43_P11993	0.378224	0.00384619	GE1193437	0.27011	0.0564
P2RX4	PURINERGIC RECEPTOR P2X, LIGAND-GATED ION CHANNEL 4	NM_031594	A_43_P12605	0.33812	0.00248163	GE1286904	0.448795	0.0095
SLC1A1	SOLUTE CARRIER FAMILY 1 (NEURONAL/EPITHELIAL HIGH AFFINITY GLUTAMATE TRANSPORTER, SYSTEM XAG), MEMBER 1	NM_013032	A_42_P785289	-0.263937	0.00101976	GE19513	-0.0332742	0.7902
RXRG	RETINOID X RECEPTOR GAMMA	NM_031765	A_43_P15844	0.0714325	0.404094	GE21527	-0.765376	0.0027
PSAT1	PHOSPHOSERINE AMINOTRANSFERASE 1	NM_198738	A_43_P16569	0.3601	0.00029231	GE14709	0.566766	0.0003
PSAT1	PHOSPHOSERINE AMINOTRANSFERASE 1	NM_198738	A_43_P16569	0.3601	0.00029231	GE14709	0.566766	0.0003
C4A	COMPLEMENT COMPONENT 4A	NM_031504	A_43_P21634	0.211759	0.0118402	GE1211637	1.42417	1.56e-06
ENC1	ECTODERMAL-NEURAL CORTEX 1	NM_001003401	A_43_P18880	NA	NA	GE14609	-0.35679	0.0018
CLDN1	CLAUDIN 1	NM_031699	A_42_P669779	-0.287995	0.00422371	GE1236786	-0.217591	0.2187
ACSL1	ACYL-COA SYNTHETASE LONG-CHAIN FAMILY MEMBER 1	NM_012820	A_43_P14632	0.334345	0.000631144	GE1161545	-0.0980422	0.4437
CST6	CYSTATIN E/M	NM_133566	A_43_P13213	-0.328678	0.0409773	GE1263786	-0.515192	0.0006
BZRP	BENZODIAZEPINE RECEPTOR, PERIPHERAL	NM_012515	A_42_P544601	0.496792	0.000133944	GE21660	1.17639	4.18e-06
BZRP	BENZODIAZEPINE RECEPTOR, PERIPHERAL	NM_012515	A_42_P544601	0.496792	0.000133944	GE21660	1.17639	4.18e-06
FBXO2	F-BOX ONLY PROTEIN 2	NM_053511	A_43_P12830	0.292369	0.00547339	GE13335	0.520548	0.0043
FBXO2	F-BOX ONLY PROTEIN 2	NM_053511	A_43_P12830	0.292369	0.00547339	GE13335	0.520548	0.0043
ABCA2	ATP-BINDING CASSETTE, SUB-FAMILY A (ABC1), MEMBER 2	NM_024396	A_42_P664259	0.376805	6.92046e-05	GE13119	0.399226	0.0384
RGD1308059	SIMILAR TO DNA SEGMENT, CHR 4, BRIGHAM & WOMENS GENETICS 0951 EXPRESSED	NM_001025022	A_42_P636616	-0.237628	0.000301748	GE15126	-0.0289991	0.8908
ZFP36L1	ZINC FINGER PROTEIN 36, C3H TYPE-LIKE 1	NM_017172	A_43_P11846	0.119555	0.104947	GE1239852	0.640991	0.0002
LOC498564	SIMILAR TO INTEGRIN, BETA-LIKE 1	NM_001017505	A_43_P18549	-0.265538	0.0279841	GE15951	-0.909689	0.0002
SCD2	STEAROYL-COENZYME A DESATURASE 2	NM_031841	A_42_P813567	0.389115	0.00031668	GE1272576	0.133695	0.1907
CXCL10	CHEMOKINE (C-X-C MOTIF) LIGAND 10	NM_139089	A_42_P597580	0.165661	0.335723	GE21938	1.90396	0.0005
RGS12	REGULATOR OF G-PROTEIN SIGNALING 12	NM_019339	A_43_P12027	-0.0926389	0.570387	GE1182422	-0.440459	0.0038
MSX1	HOMEO BOX, MSH-LIKE 1	NM_031059	A_43_P12497	0.261264	0.0196208	GE21611	0.894682	1.95e-05
RPL32	RIBOSOMAL PROTEIN L32	NM_013226	A_43_P11760	0.28354	0.00312525	GE20255	0.19497	0.1082
TAGLN	TRANSGELIN	NM_031549	A_43_P12581	0.56165	0.000664543	GE19749	1.58909	4.06e-05
TAGLN	TRANSGELIN	NM_031549	A_43_P12581	0.56165	0.000664543	GE19749	1.58909	4.06e-05
VTN	VITRONECTIN	NM_019156	A_42_P518441	0.144912	0.1689	GE21982	1.00295	7.5e-06
DECR1	2,4-DIENOYL COA REDUCTASE 1, MITOCHONDRIAL	NM_057197	A_42_P526030	0.342736	0.000233588	GE19454	0.385707	0.0015
DECR1	2,4-DIENOYL COA REDUCTASE 1, MITOCHONDRIAL	NM_057197	A_42_P526030	0.342736	0.000233588	GE19454	0.385707	0.0015
ACBD4	ACYL-COENZYME A BINDING DOMAIN CONTAINING 4	NM_001012013	A_42_P482542	-0.214497	0.00061849	GE1285349	-0.10036	0.4279
ADRA1D	ADRENERGIC RECEPTOR, ALPHA 1D	NM_024483	A_42_P501233	-0.734686	0.000743063	GE1156715	-0.122334	0.3431
GPC4	SIMILAR TO GLYPICAN 4	NM_001014108	A_43_P21658	-0.270097	0.000500334	GE1242550	-0.246909	0.2093
TRPC6	TRANSIENT RECEPTOR PROTEIN 6	NM_053559	A_43_P15582	-0.498918	8.54117e-05	GE1110643	-0.30793	0.0945
IL11RA1	INTERLEUKIN 11 RECEPTOR, ALPHA CHAIN 1	NM_139116	A_42_P569822	0.264479	0.00214672	GE15485	0.643856	0.0016
IL11RA1	INTERLEUKIN 11 RECEPTOR, ALPHA CHAIN 1	NM_139116	A_42_P569822	0.264479	0.00214672	GE15485	0.643856	0.0016
CATNA1	CATENIN (CADHERIN-ASSOCIATED PROTEIN), ALPHA 1, 102KDA	NM_001007145	A_42_P669549	0.519825	1.6135e-05	GE12339	0.082975	0.6063
PHYHIP	PHYTANOYL-COA HYDROXYLASE INTERACTING PROTEIN	NM_001017376	A_42_P547785	-0.543809	9.26399e-05	GE1169587	-0.426625	0.0854
TEKT1	TEKTIN 1	NM_053508	A_43_P12828	0.185742	0.000563284	GE17134	0.769264	0.0003
GPR149	G PROTEIN-COUPLED RECEPTOR 149	NM_138891	A_43_P13325	0.267987	0.020582	GE1288957	0.849759	5.73e-05
NR4A3	NEURON-DERIVED ORPHAN RECEPTOR	NM_017352	A_43_P12619	-0.31341	0.00555234	GE1181675	-1.10005	1.2e-05
NR4A3	NEURON-DERIVED ORPHAN RECEPTOR	NM_017352	A_43_P12619	-0.31341	0.00555234	GE1181675	-1.10005	1.2e-05
ARAF	V-RAF ONCOGENE HOMOLOG 1 (MURINE SARCOMA 3611 VIRUS)	NM_001033663	A_42_P674623	0.226635	0.00176985	GE1145981	0.725959	0.0003
ARAF	V-RAF ONCOGENE HOMOLOG 1 (MURINE SARCOMA 3611 VIRUS)	NM_001033663	A_42_P674623	0.226635	0.00176985	GE1145981	0.725959	0.0003
LOC502894	HYPOTHETICAL PROTEIN LOC502894	NM_001025064	A_42_P675139	-0.492245	0.000285526	GE17670	-0.393084	0.0067
NT5DC2	SIMILAR TO HYPOTHETICAL PROTEIN FLJ12442	NM_001009271	A_43_P11350	0.102252	0.0760463	GE1163989	0.477677	0.0048
AQP4	AQUAPORIN 4	NM_012825	A_42_P716047	NA	NA	GE1292531	0.863066	1.13e-06
GNG11	GUANINE NUCLEOTIDE BINDING PROTEIN (G PROTEIN), GAMMA 11	NM_022396	A_42_P790405	0.204449	0.0956825	GE1286367	0.620962	0.0007
RAB3B	RAB3B, MEMBER RAS ONCOGENE FAMILY	NM_031091	A_43_P12510	0.0312604	0.729063	GE1220199	0.645702	0.0023
F13A1	COAGULATION FACTOR XIII, A1 SUBUNIT	NM_021698	A_43_P12107	0.102215	0.0337962	GE18298	1.43914	7.04e-05
FXYD5	FXYD DOMAIN-CONTAINING ION TRANSPORT REGULATOR 5	NM_021909	A_42_P685287	0.27004	0.00740616	GE1212886	0.479541	0.0023
IGSF10	IMMUNOGLOBULIN SUPERFAMILY, MEMBER 10	NM_198768	A_42_P469969	NA	NA	GE1205849	0.529571	0.0039
ACBD4	ACYL-COENZYME A BINDING DOMAIN CONTAINING 4	NM_001012013	A_42_P482542	-0.214497	0.00061849	GE1234962	-0.044836	0.7761
LAPTM4A	LYSOSOMAL-ASSOCIATED PROTEIN TRANSMEMBRANE 4A	NM_199384	A_42_P588927	0.343836	0.000225847	GE1192904	0.304978	0.0019
LAPTM4A	LYSOSOMAL-ASSOCIATED PROTEIN TRANSMEMBRANE 4A	NM_199384	A_42_P588927	0.343836	0.000225847	GE1192904	0.304978	0.0019
PLAT	PLASMINOGEN ACTIVATOR, TISSUE	NM_013151	A_43_P11738	-0.00464937	0.949031	GE20211	0.562768	0.0005
TPP1	CEROID-LIPOFUSCINOSIS, NEURONAL 2	NM_031357	A_43_P12565	0.18503	0.00215335	GE14203	0.543199	0.0003
ENC1	ECTODERMAL-NEURAL CORTEX 1	NM_001003401	A_42_P640277	-0.743465	1.35018e-05	GE14609	-0.35679	0.0018
ENC1	ECTODERMAL-NEURAL CORTEX 1	NM_001003401	A_42_P640277	-0.743465	1.35018e-05	GE14609	-0.35679	0.0018
KCNH1	POTASSIUM VOLTAGE-GATED CHANNEL, SUBFAMILY H (EAG-RELATED), MEMBER 1	NM_031742	A_43_P12658	-0.389858	0.000750309	GE1179146	-0.48076	0.0098
SLN	SARCOLIPIN	NM_001013247	A_43_P10021	-0.199736	0.00428282	GE12365	-0.748796	0.001
SLC15A3	PEPTIDE/HISTIDINE TRANSPORTER PHT2	NM_139341	A_43_P13389	0.152612	0.0133853	GE16659	0.732747	0.0044
VKORC1	VITAMIN K EPOXIDE REDUCTASE COMPLEX, SUBUNIT 1	NM_203335	A_43_P10257	0.301469	0.00287047	GE13636	0.358284	0.0144
SLC27A5	BILE ACID COA LIGASE	NM_024143	A_43_P12402	0.255491	0.00360901	GE1233646	1.46603	0.0002
SLC27A5	BILE ACID COA LIGASE	NM_024143	A_43_P12402	0.255491	0.00360901	GE1233646	1.46603	0.0002
FKBP1A	FK506 BINDING PROTEIN 1A	NM_013102	A_43_P11713	-0.213626	0.0059667	GE17999	-0.113411	0.4173
ST3GAL5	SIALYLTRANSFERASE 9 (CMP-NEUAC:LACTOSYLCERAMIDE ALPHA-2,3-SIALYLTRANSFERASE)	NM_031337	A_42_P611397	-0.32196	0.000174235	GE13063	-0.293182	0.0837
NELL2	NEL-LIKE 2 HOMOLOG (CHICKEN)	NM_031070	A_43_P12500	-0.685592	1.64655e-05	GE20947	-0.0110064	0.9335
TGIF	TG INTERACTING FACTOR	NM_001015020	A_42_P479328	0.244379	0.00141004	GE12919	1.01035	4.52e-05
TGIF	TG INTERACTING FACTOR	NM_001015020	A_42_P479328	0.244379	0.00141004	GE12919	1.01035	4.52e-05
MIG12	MID1 INTERACTING G12-LIKE PROTEIN	NM_206950	A_42_P807033	0.493641	0.00196812	GE1232275	0.474358	0.0013
MIG12	MID1 INTERACTING G12-LIKE PROTEIN	NM_206950	A_42_P807033	0.493641	0.00196812	GE1232275	0.474358	0.0013
PPP1R1A	PROTEIN PHOSPHATASE 1, REGULATORY (INHIBITOR) SUBUNIT 1A	NM_022676	A_43_P12287	-0.552776	0.000309822	GE16198	-0.0575418	0.697
CD44	CD44 ANTIGEN	NM_012924	A_43_P11621	0.418811	0.0365222	GE21378	1.4197	3.07e-05
NA	NA	NM_001047085	A_42_P838973	0.426466	0.000186742	GE1148436	0.497229	0.0011
FKBP1A	FK506 BINDING PROTEIN 1A	NM_013102	A_43_P11713	-0.213626	0.0059667	GE22031	-0.131155	0.2526
SOD1	SUPEROXIDE DISMUTASE 1	NM_017050	A_42_P764584	0.24686	0.00511572	GE20304	-0.0365259	0.7308
CATNA1	CATENIN (CADHERIN-ASSOCIATED PROTEIN), ALPHA 1, 102KDA	NM_001007145	A_43_P19010	0.102621	0.111289	GE1249788	0.515107	0.0003
DGAT2	DIACYLGLYCEROL O-ACYLTRANSFERASE HOMOLOG 2 (MOUSE)	NM_001012345	A_42_P733209	-0.343593	0.00216286	GE1252523	-0.00346663	0.9823
RPL10	RIBOSOMAL PROTEIN L10	NM_031100	A_42_P552949	0.328687	0.000798898	GE21165	0.147958	0.0995
CNTF	CILIARY NEUROTROPHIC FACTOR	NM_013166	A_42_P643868	0.300276	0.0129374	GE20218	1.41419	1.9e-06
VCAM1	VASCULAR CELL ADHESION MOLECULE 1	NM_012889	A_42_P499158	0.435139	0.000706256	GE20039	0.46069	0.0024
VCAM1	VASCULAR CELL ADHESION MOLECULE 1	NM_012889	A_42_P499158	0.435139	0.000706256	GE20039	0.46069	0.0024
RCN2	RETICULOCALBIN 2	NM_017132	A_42_P707230	0.38622	0.000337433	GE20363	0.137241	0.2484
PPP3CA	PROTEIN PHOSPHATASE 3, CATALYTIC SUBUNIT, ALPHA ISOFORM	NM_017041	A_42_P777177	-0.569726	1.7521e-06	GE16096	-0.146563	0.324
EDNRB	ENDOTHELIN RECEPTOR TYPE B	NM_017333	A_42_P524460	0.439652	0.00546564	GE22139	0.64284	0.0012
EDNRB	ENDOTHELIN RECEPTOR TYPE B	NM_017333	A_42_P524460	0.439652	0.00546564	GE22139	0.64284	0.0012
RAC2	RAS-RELATED C3 BOTULINUM SUBSTRATE 2	NM_001008384	A_43_P15000	0.359204	0.00158694	GE15774	0.330329	0.0384
DYRK3	DUAL-SPECIFICITY TYROSINE-(Y)-PHOSPHORYLATION REGULATED KINASE 3	NM_001024767	A_42_P723540	-0.342093	0.00279692	GE1232687	-0.175436	0.2343
WNT4	WINGLESS-RELATED MMTV INTEGRATION SITE 4	NM_053402	A_42_P559414	-0.648605	0.000148019	GE13445	-0.234296	0.2375
ICAM1	INTERCELLULAR ADHESION MOLECULE 1	NM_012967	A_43_P15253	0.067503	0.291011	GE1228520	0.945982	5.44e-05
RPS6	RIBOSOMAL PROTEIN S6	NM_017160	A_43_P10050	0.357241	0.000173992	GE20384	0.284988	0.0065
SOD1	SUPEROXIDE DISMUTASE 1	NM_017050	A_42_P764584	0.24686	0.00511572	GE21779	0.0458623	0.6494
TPP1	CEROID-LIPOFUSCINOSIS, NEURONAL 2	NM_031357	A_43_P12565	0.18503	0.00215335	GE13131	0.714663	0.0007
GRN	GRANULIN	NM_017113	A_43_P11827	0.12053	0.032518	GE22152	0.599413	0.0038
LGALS1	LECTIN, GALACTOSE BINDING, SOLUBLE 1	NM_019904	A_42_P759159	0.165695	0.267503	GE20705	1.02638	5.44e-05
GABBR2	G PROTEIN-COUPLED RECEPTOR 51	NM_031802	A_42_P467277	-0.37623	9.83778e-05	GE13267	-0.128787	0.289
DPP7	DIPEPTIDYLPEPTIDASE 7	NM_031973	A_43_P15574	0.292694	0.0312082	GE13139	0.454597	0.0015
RASD2	RASD FAMILY, MEMBER 2	NM_133568	A_42_P540711	0.703905	0.000947097	GE1151848	0.0426443	0.838
NUAK2	SNF1/AMP-ACTIVATED PROTEIN KINASE	NM_001007617	A_42_P770175	0.162888	0.0245692	GE1294860	0.765959	0.0005
VTN	VITRONECTIN	NM_019156	A_42_P518441	0.144912	0.1689	GE20554	1.07341	3.17e-06
ACAA2	ACETYL-COENZYME A ACYLTRANSFERASE 2 (MITOCHONDRIAL 3-OXOACYL-COENZYME A THIOLASE)	NM_130433	A_42_P526004	0.234954	0.00390499	GE21084	0.398788	0.0147
MPEG1	MACROPHAGE EXPRESSED GENE 1	NM_022617	A_43_P12264	0.0698855	0.16122	GE14234	0.749577	0.001
CTE1	CYTOSOLIC ACYL-COA THIOESTERASE 1	NM_031315	A_42_P548410	0.208919	0.0103095	GE1292545	0.708496	0.0018
PMP22	PERIPHERAL MYELIN PROTEIN 22	NM_017037	A_42_P459428	0.294955	0.00274039	GE20294	0.430713	0.001
PMP22	PERIPHERAL MYELIN PROTEIN 22	NM_017037	A_42_P459428	0.294955	0.00274039	GE20294	0.430713	0.001
RGD1303232	PHYTN_DEHYDRO AND PYR_REDOX DOMAIN CONTAINING PROTEIN RGD1303232	NM_001004261	A_42_P830729	0.305854	0.00214865	GE14038	0.625364	0.0005
RGD1303232	PHYTN_DEHYDRO AND PYR_REDOX DOMAIN CONTAINING PROTEIN RGD1303232	NM_001004261	A_42_P830729	0.305854	0.00214865	GE14038	0.625364	0.0005
NEUROD1	NEUROGENIC DIFFERENTIATION 1	NM_019218	A_42_P533161	-0.725153	7.28818e-05	GE20591	-0.410045	0.0236
CHRNA7	CHOLINERGIC RECEPTOR, NICOTINIC, ALPHA POLYPEPTIDE 7	NM_012832	A_42_P825460	-0.298477	0.0339888	GE1104649	-0.949533	7.43e-06
MT1A	METALLOTHIONEIN 1A	NM_138826	A_43_P13297	0.133219	0.282036	GE21633	0.836086	0.0004
ANXA3	ANNEXIN A3	NM_012823	A_43_P11577	0.215789	0.013604	GE1293779	0.82546	0.0007
EHD3	EH-DOMAIN CONTAINING 3	NM_138890	A_43_P13324	-0.269307	0.0021697	GE1255605	-0.121392	0.3486
OPLAH	5-OXOPROLINASE (ATP-HYDROLYSING)	NM_053904	A_42_P614689	0.0825097	0.204547	GE21014	0.467279	0.0037
ENC1	ECTODERMAL-NEURAL CORTEX 1	NM_001003401	A_42_P640277	-0.743465	1.35018e-05	GE1133361	-0.522841	0.0014
ENC1	ECTODERMAL-NEURAL CORTEX 1	NM_001003401	A_42_P640277	-0.743465	1.35018e-05	GE1133361	-0.522841	0.0014
PRDX1	PEROXIREDOXIN 1	NM_057114	A_42_P608062	0.395744	0.000581741	GE19485	0.256044	0.0353
NR4A3	NEURON-DERIVED ORPHAN RECEPTOR	NM_017352	A_43_P12619	-0.31341	0.00555234	GE1192279	-1.28244	3.16e-05
NR4A3	NEURON-DERIVED ORPHAN RECEPTOR	NM_017352	A_43_P12619	-0.31341	0.00555234	GE1192279	-1.28244	3.16e-05
PPP3CA	PROTEIN PHOSPHATASE 3, CATALYTIC SUBUNIT, ALPHA ISOFORM	NM_017041	A_42_P777177	-0.569726	1.7521e-06	GE21625	-0.150721	0.1846
FZD1	FRIZZLED HOMOLOG 1 (DROSOPHILA)	NM_021266	A_42_P628953	0.153121	0.0266392	GE1134565	0.796182	0.0004
FOS	FBJ MURINE OSTEOSARCOMA VIRAL ONCOGENE HOMOLOG	NM_022197	A_42_P552092	0.485025	1.84621e-05	GE18981	1.42245	8.01e-06
FOS	FBJ MURINE OSTEOSARCOMA VIRAL ONCOGENE HOMOLOG	NM_022197	A_42_P552092	0.485025	1.84621e-05	GE18981	1.42245	8.01e-06
CAMK2A	CALCIUM/CALMODULIN-DEPENDENT PROTEIN KINASE II ALPHA SUBUNIT	NM_012920	A_43_P11618	-0.313598	0.000552777	GE13501	-0.149601	0.2728
ASNS	ASPARAGINE SYNTHETASE	NM_013079	A_43_P15258	-0.271336	0.000501411	GE21899	-0.120451	0.2672
SPON1	SPONDIN 1	NM_172067	A_43_P13420	-0.290143	0.00466768	GE19762	0.128425	0.2997
MGMT	O-6-METHYLGUANINE-DNA METHYLTRANSFERASE	NM_012861	A_42_P837214	0.233413	0.00384879	GE22132	0.915253	6.72e-05
MGMT	O-6-METHYLGUANINE-DNA METHYLTRANSFERASE	NM_012861	A_42_P837214	0.233413	0.00384879	GE22132	0.915253	6.72e-05
MIG12	MID1 INTERACTING G12-LIKE PROTEIN	NM_206950	A_43_P21354	0.278835	0.000295565	GE1232275	0.474358	0.0013
MIG12	MID1 INTERACTING G12-LIKE PROTEIN	NM_206950	A_43_P21354	0.278835	0.000295565	GE1232275	0.474358	0.0013
SYN2	SYNAPSIN II	NM_001034020	A_43_P11955	-0.338867	0.0109464	GE18667	-0.37202	0.003
F2R	COAGULATION FACTOR II (THROMBIN) RECEPTOR	NM_012950	A_43_P11629	0.273539	0.00223297	GE1294377	0.299596	0.0846
NA	NA	NM_001047085	A_42_P838973	0.426466	0.000186742	GE16944	0.347779	0.0285
MVP	MAJOR VAULT PROTEIN	NM_022715	A_42_P517667	0.417911	0.000253512	GE1300012	0.907429	4.95e-05
MVP	MAJOR VAULT PROTEIN	NM_022715	A_42_P517667	0.417911	0.000253512	GE1300012	0.907429	4.95e-05
CORO1B	CORONIN, ACTIN-BINDING PROTEIN, 1B	NM_019222	A_43_P11982	0.240127	0.00393791	GE20595	0.323543	0.0286
VAMP8	VESICLE-ASSOCIATED MEMBRANE PROTEIN 8	NM_031827	A_43_P12697	0.248063	0.00660124	GE13368	0.620774	8.55e-05
RXRG	RETINOID X RECEPTOR GAMMA	NM_031765	A_43_P15844	0.0714325	0.404094	GE17943	-0.801632	0.0007
HSD11B1	HYDROXYSTEROID 11-BETA DEHYDROGENASE 1	NM_017080	A_42_P814965	-0.340604	0.000210546	GE20326	-0.0289991	0.8338
RTN4R	RETICULON 4 RECEPTOR	NM_053613	A_43_P12871	-0.371404	0.000352464	GE1210735	-0.190503	0.1913
TNFRSF1A	TUMOR NECROSIS FACTOR RECEPTOR SUPERFAMILY, MEMBER 1A	NM_013091	A_43_P15259	0.341522	0.00171948	GE21825	0.505484	0.0036
TNFRSF1A	TUMOR NECROSIS FACTOR RECEPTOR SUPERFAMILY, MEMBER 1A	NM_013091	A_43_P15259	0.341522	0.00171948	GE21825	0.505484	0.0036
FKBP5	FK506 BINDING PROTEIN 5	NM_001012174	A_42_P493879	-0.268622	0.000551298	GE1229133	0.0364682	0.8371
LOC498564	SIMILAR TO INTEGRIN, BETA-LIKE 1	NM_001017505	A_43_P17599	-0.0701249	0.471679	GE15951	-0.909689	0.0002
LAPTM4A	LYSOSOMAL-ASSOCIATED PROTEIN TRANSMEMBRANE 4A	NM_199384	A_42_P588927	0.343836	0.000225847	GE1305148	0.361544	0.0312
SLC2A4	SOLUTE CARRIER FAMILY 2 (FACILITATED GLUCOSE TRANSPORTER), MEMBER 4	NM_012751	A_42_P757990	0.0485048	0.404534	GE19942	1.10923	0.0009
WNT4	WINGLESS-RELATED MMTV INTEGRATION SITE 4	NM_053402	A_42_P559414	-0.648605	0.000148019	GE1246404	-0.163429	0.261
FATH	FAT TUMOR SUPPRESSOR HOMOLOG (DROSOPHILA)	NM_031819	A_42_P592144	0.457007	0.00144499	GE1164503	0.487383	0.1863
DGKZ	DIACYLGLYCEROL KINASE ZETA	NM_031143	A_43_P12540	-0.274458	0.00270166	GE19516	-0.0920326	0.6692
EMB	EMBIGIN	NM_053719	A_42_P683757	0.244351	0.0625795	GE15693	0.564232	0.0007
KCNV1	POTASSIUM CHANNEL, SUBFAMILY V, MEMBER 1	NM_021697	A_42_P762445	-0.302124	0.00727107	GE20781	-0.629501	0.0002
PPP3CA	PROTEIN PHOSPHATASE 3, CATALYTIC SUBUNIT, ALPHA ISOFORM	NM_017041	A_43_P11790	-0.416264	0.000824001	GE1296551	-0.166503	0.2081
EMP3	EPITHELIAL MEMBRANE PROTEIN 3	NM_030847	A_42_P517399	0.2309	0.0252788	GE1120759	0.96798	0.0003
SOD1	SUPEROXIDE DISMUTASE 1	NM_017050	A_43_P14620	0.25202	0.00239667	GE20304	-0.0365259	0.7308
ENC1	ECTODERMAL-NEURAL CORTEX 1	NM_001003401	A_43_P18880	NA	NA	GE1133361	-0.522841	0.0014
SERPINI1	SERINE (OR CYSTEINE) PEPTIDASE INHIBITOR, CLADE I, MEMBER 1	NM_053779	A_42_P549721	-0.0575078	0.723448	GE13451	-0.624154	0.0005
SLC12A4	SOLUTE CARRIER FAMILY 12, MEMBER 4	NM_019229	A_42_P467994	0.269539	0.0231711	GE20598	0.849038	1.79e-05
ATP2B1	ATPASE, CA++ TRANSPORTING, PLASMA MEMBRANE 1	NM_053311	A_43_P12761	-0.383491	0.000470684	GE1107602	-0.209395	0.1841
GRN	GRANULIN	NM_017113	A_43_P11827	0.12053	0.032518	GE20350	0.703278	0.0006
G10	MATERNAL G10 TRANSCRIPT	NM_053936	A_43_P12986	0.635168	0.000430079	GE13320	0.360196	0.1127
GIT2	SIMILAR TO GIT2 PROTEIN	NM_001005553	A_43_P16552	0.0157262	0.858351	GE1269429	0.890641	0.0009
LMO7	LIM DOMAIN ONLY PROTEIN 7	NM_001001515	A_42_P469142	-0.365535	0.00388263	GE1111796	-0.16246	0.3207
ANXA4	ANNEXIN A4	NM_024155	A_43_P12409	0.224653	0.012381	GE1126565	0.892585	0.0007
LAMP2	LYSOSOMAL MEMBRANE GLYCOPROTEIN 2	NM_017068	A_42_P612001	0.522517	0.000245787	GE20317	0.735955	6.33e-05
LAMP2	LYSOSOMAL MEMBRANE GLYCOPROTEIN 2	NM_017068	A_42_P612001	0.522517	0.000245787	GE20317	0.735955	6.33e-05
CDH13	CADHERIN 13	NM_138889	A_42_P749820	-0.269046	0.00439204	GE18291	0.0140696	0.9507
SOD1	SUPEROXIDE DISMUTASE 1	NM_017050	A_43_P14620	0.25202	0.00239667	GE21779	0.0458623	0.6494
CA2	CARBONIC ANHYDRASE 2	NM_019291	A_42_P545943	0.503209	1.20168e-06	GE20640	0.285935	0.1155
PDLIM3	PDZ AND LIM DOMAIN 3	NM_053650	A_42_P810541	0.311319	0.00168293	GE1176364	1.03626	0.0006
PDLIM3	PDZ AND LIM DOMAIN 3	NM_053650	A_42_P810541	0.311319	0.00168293	GE1176364	1.03626	0.0006
KCNH1	POTASSIUM VOLTAGE-GATED CHANNEL, SUBFAMILY H (EAG-RELATED), MEMBER 1	NM_031742	A_43_P12658	-0.389858	0.000750309	GE22257	-0.16715	0.3344
CTSS	CATHEPSIN S	NM_017320	A_43_P11914	0.0311691	0.693051	GE20497	0.473215	0.0023
ARL2	ADP-RIBOSYLATION FACTOR-LIKE 2	NM_031711	A_42_P819411	0.239697	0.001467	GE21197	0.15017	0.2802
ATP1B3	ATPASE, NA+/K+ TRANSPORTING, BETA 3 POLYPEPTIDE	NM_012913	A_42_P555125	0.368155	0.000286884	GE20053	0.233643	0.1047
SERPING1	SERINE (OR CYSTEINE) PEPTIDASE INHIBITOR, CLADE G, MEMBER 1	NM_199093	A_43_P16428	0.147478	0.0316831	GE16641	2.94323	2.07e-09
GPM6B	GLYCOPROTEIN M6B	NM_138846	A_43_P13307	0.425197	0.000516939	GE1149344	0.400866	0.095
PPP3CA	PROTEIN PHOSPHATASE 3, CATALYTIC SUBUNIT, ALPHA ISOFORM	NM_017041	A_43_P11790	-0.416264	0.000824001	GE17365	-0.320306	0.1617
RARRES2	RETINOIC ACID RECEPTOR RESPONDER (TAZAROTENE INDUCED) 2	NM_001013427	A_42_P628853	0.168829	0.0866138	GE16529	0.498251	0.0036
ACAA2	ACETYL-COENZYME A ACYLTRANSFERASE 2 (MITOCHONDRIAL 3-OXOACYL-COENZYME A THIOLASE)	NM_130433	A_42_P526004	0.234954	0.00390499	GE1183079	0.0912598	0.5989
RPE65	RETINAL PIGMENT EPITHELIUM 65	NM_053562	A_42_P540235	0.068159	0.468604	GE1232643	0.719841	0.0008
RAB13	RAB13, MEMBER RAS ONCOGENE FAMILY	NM_031092	A_43_P15701	0.25139	0.00467519	GE19755	0.601697	0.0004
RAB13	RAB13, MEMBER RAS ONCOGENE FAMILY	NM_031092	A_43_P15701	0.25139	0.00467519	GE19755	0.601697	0.0004
SLC7A7	SOLUTE CARRIER FAMILY 7 (CATIONIC AMINO ACID TRANSPORTER, Y+ SYSTEM), MEMBER 7	NM_031341	A_42_P776713	0.25761	0.00136841	GE21264	0.206518	0.1786
LRRC7	LEUCINE RICH REPEAT CONTAINING 7	NM_057142	A_43_P15485	-0.24697	0.000276551	GE20999	-0.115129	0.5085
NTRK3	NEUROTROPHIC TYROSINE KINASE, RECEPTOR, TYPE 3	NM_019248	A_43_P18426	-0.487266	0.000156317	GE20612	-0.138283	0.2493
LOC313519	SIMILAR TO RIKEN CDNA 5330440M15	NM_001014067	A_42_P757606	0.130926	0.0916952	GE16583	0.509747	0.0021
MCAM	MELANOMA CELL ADHESION MOLECULE	NM_001034009	A_43_P12383	0.0037235	0.950996	GE1275540	1.04768	0.0011
PSMB8	PROTEOSOME (PROSOME, MACROPAIN) SUBUNIT, BETA TYPE 8	NM_080767	A_42_P761035	0.284536	0.0100599	GE1237531	0.879	3.32e-05
SERPINH1	SERINE (OR CYSTEINE) PROTEINASE INHIBITOR, CLADE H, MEMBER 1	NM_017173	A_43_P11847	0.348343	0.000247958	GE20393	0.473527	0.0246
GEFT	RAC/CDC42 EXCHANGE FACTOR	NM_199395	A_43_P17978	-0.327356	0.00121122	GE14063	-0.493703	0.0148
RPL11	RIBOSOMAL PROTEIN L11	NM_001025739	A_42_P694644	0.268343	0.00153867	GE1263702	0.231432	0.062
CLSTN2	CALSYNTENIN 2	NM_134377	A_43_P15490	-0.39487	0.00107987	GE1220567	-0.585107	0.005
CLSTN2	CALSYNTENIN 2	NM_134377	A_43_P15490	-0.39487	0.00107987	GE1220567	-0.585107	0.005
LAMP2	LYSOSOMAL MEMBRANE GLYCOPROTEIN 2	NM_017068	A_42_P612001	0.522517	0.000245787	GE1148786	0.37529	0.022
PSAT1	PHOSPHOSERINE AMINOTRANSFERASE 1	NM_198738	A_43_P16569	0.3601	0.00029231	GE1284998	0.620493	8.83e-05
PSAT1	PHOSPHOSERINE AMINOTRANSFERASE 1	NM_198738	A_43_P16569	0.3601	0.00029231	GE1284998	0.620493	8.83e-05
LOC298643	IGFBP-2-BINDING PROTEIN, IIP45	NM_001017450	A_42_P827057	-0.0498436	0.428536	GE1233125	0.913033	0.0002
MT3	METALLOTHIONEIN 3	NM_053968	A_43_P13002	0.0395111	0.607917	GE22200	0.266157	0.0005
DBCCR1	DELETED IN BLADDER CANCER CHROMOSOME REGION CANDIDATE 1 (HUMAN)	NM_080482	A_43_P13073	-0.45725	3.72392e-05	GE1228781	-0.316348	0.0379
GIT2	SIMILAR TO GIT2 PROTEIN	NM_001005553	A_43_P17980	-0.0192194	0.677077	GE1269429	0.890641	0.0009
CD48	CD48 ANTIGEN	NM_139103	A_42_P646305	0.608338	0.000417979	GE21087	0.729879	0.003
CD48	CD48 ANTIGEN	NM_139103	A_42_P646305	0.608338	0.000417979	GE21087	0.729879	0.003
PGRMC1	PROGESTERONE RECEPTOR MEMBRANE COMPONENT 1	NM_021766	A_42_P674786	0.274233	0.000357006	GE20803	-0.0516982	0.7151
AGT	ANGIOTENSINOGEN	NM_134432	A_43_P13272	0.430827	0.00381129	GE19165	0.399554	0.0133
CSRP1	CYSTEINE AND GLYCINE-RICH PROTEIN 1	NM_017148	A_43_P11838	0.609469	2.27043e-05	GE20374	0.755058	0.0008
CSRP1	CYSTEINE AND GLYCINE-RICH PROTEIN 1	NM_017148	A_43_P11838	0.609469	2.27043e-05	GE20374	0.755058	0.0008
ADRA1D	ADRENERGIC RECEPTOR, ALPHA 1D	NM_024483	A_42_P501233	-0.734686	0.000743063	GE21721	-0.296368	0.0746
TUBB6	SIMILAR TO RIKEN CDNA 2310057H16	NM_001025675	A_43_P13701	-0.0438687	0.477795	GE1106781	0.910426	3.63e-05
PPP3R1	PROTEIN PHOSPHATASE 3, REGULATORY SUBUNIT B, ALPHA ISOFORM (CALCINEURIN B, TYPE I)	NM_017309	A_43_P11907	-0.157401	0.0559283	GE21570	-0.640479	0.0044
SH3GL3	SH3 DOMAIN PROTEIN 2 C1	NM_031238	A_43_P12546	0.29273	0.00231918	GE13487	-0.345198	0.0475
SERPINH1	SERINE (OR CYSTEINE) PROTEINASE INHIBITOR, CLADE H, MEMBER 1	NM_017173	A_43_P11847	0.348343	0.000247958	GE21834	0.370945	0.1029
PPP3R1	PROTEIN PHOSPHATASE 3, REGULATORY SUBUNIT B, ALPHA ISOFORM (CALCINEURIN B, TYPE I)	NM_017309	A_43_P10391	-0.447753	0.0118995	GE21570	-0.640479	0.0044
BIN2	BRIDGING INTEGRATOR 2	NM_001012223	A_42_P778347	0.289416	0.00295379	GE1274621	0.536948	0.0161
RGD1310323	SIMILAR TO RIKEN CDNA 1200004M23	NM_001008348	A_43_P17740	0.0495581	0.316229	GE1266351	0.552967	0.0012
DGKZ	DIACYLGLYCEROL KINASE ZETA	NM_031143	A_43_P12540	-0.274458	0.00270166	GE1168994	-0.0421597	0.8225
GPM6B	GLYCOPROTEIN M6B	NM_138846	A_43_P13307	0.425197	0.000516939	GE13116	0.246469	0.0764
DNASE2	DEOXYRIBONUCLEASE II	NM_138539	A_42_P462299	0.106027	0.0638265	GE13429	0.557484	0.0022
BOK	BCL-2-RELATED OVARIAN KILLER PROTEIN	NM_017312	A_43_P11910	-0.17265	0.101944	GE14639	-1.15746	9.79e-07
PHYHD1	PHYTANOYL-COA DIOXYGENASE DOMAIN CONTAINING 1	NM_001013081	A_43_P11297	0.205558	0.00493044	GE1262802	0.337197	0.16
SLC1A3	SOLUTE CARRIER FAMILY 1 (GLIAL HIGH AFFINITY GLUTAMATE TRANSPORTER), MEMBER 3	NM_019225	A_42_P533183	0.265563	0.00401405	GE1270504	0.35095	0.2552
GPM6B	GLYCOPROTEIN M6B	NM_138846	A_43_P13307	0.425197	0.000516939	GE1203394	0.198997	0.2548
GNA15	GUANINE NUCLEOTIDE BINDING PROTEIN, ALPHA 15	NM_053542	A_42_P485309	0.307579	0.00128402	GE13051	0.148218	0.3204
NTRK3	NEUROTROPHIC TYROSINE KINASE, RECEPTOR, TYPE 3	NM_019248	A_43_P11992	-0.364592	0.000583711	GE1247404	-0.0292936	0.8422
NA	NA	NM_001042354	A_42_P674534	-0.609096	2.48467e-05	GE20786	-0.0875801	0.6209
GABBR2	G PROTEIN-COUPLED RECEPTOR 51	NM_031802	A_42_P467277	-0.37623	9.83778e-05	GE1290169	-0.166179	0.2645
ZMYND10	ZINC FINGER, MYND DOMAIN-CONTAINING 10	NM_001004284	A_43_P21489	0.045945	0.582861	GE1147767	0.799253	0.0012
SLC20A2	SOLUTE CARRIER FAMILY 20, MEMBER 2	NM_017223	A_43_P10047	0.522448	1.34307e-05	GE20434	0.295135	0.1114
IFIT1	INTERFERON-INDUCED PROTEIN WITH TETRATRICOPEPTIDE REPEATS 1	NM_020096	A_43_P15499	0.0570927	0.486339	GE21536	0.901417	0.0035
EYA2	EYES ABSENT 2 HOMOLOG (DROSOPHILA)	NM_130427	A_43_P22267	0.0182912	0.766814	GE16962	1.51546	4.55e-05
SPNA2	ALPHA-SPECTRIN 2	NM_171983	A_43_P10409	-0.425589	0.000102457	GE1156379	-0.0822246	0.4418
FAH	FUMARYLACETOACETATE HYDROLASE	NM_017181	A_43_P11851	0.55415	2.00015e-05	GE1262648	0.0409625	0.8037
GPD1	GLYCEROL-3-PHOSPHATE DEHYDROGENASE 1 (SOLUBLE)	NM_022215	A_42_P480224	0.315106	0.0010069	GE1206187	0.278698	0.1605
PARP3	ADP-RIBOSYLTRANSFERASE (NAD+, POLY (ADP-RIBOSE POLYMERASE)-LIKE 3	NM_001008328	A_43_P19979	0.0730135	0.362639	GE1169819	0.665211	0.0005
TAGLN3	TRANSGELIN 3	NM_001035236	A_43_P12633	-0.239254	0.00293388	GE1116098	-0.253085	0.1141
MADD	MAP-KINASE ACTIVATING DEATH DOMAIN	NM_053585	A_43_P12859	-0.243491	0.00435421	GE21021	-0.322108	0.0698
ACCN1	AMILORIDE-SENSITIVE CATION CHANNEL 1, NEURONAL (DEGENERIN)	NM_001034014	A_42_P473253	0.465598	0.00123558	GE1271601	-0.0259113	0.8765
NA	NA	NM_001042354	A_42_P674534	-0.609096	2.48467e-05	GE18690	-0.20307	0.0875
PRDX1	PEROXIREDOXIN 1	NM_057114	A_43_P14194	0.354416	9.91596e-05	GE19485	0.256044	0.0353
PLP	PROTEOLIPID PROTEIN	NM_030990	A_42_P741139	1.06491	2.21206e-05	GE1304252	0.0985543	0.7049
ACSL1	ACYL-COA SYNTHETASE LONG-CHAIN FAMILY MEMBER 1	NM_012820	A_43_P14632	0.334345	0.000631144	GE21628	-0.198262	0.4821
PRDX2	PEROXIREDOXIN 2	NM_017169	A_43_P14135	0.207369	0.00389575	GE20391	0.0515809	0.6342
RPS24	RIBOSOMAL PROTEIN S24	NM_031112	A_43_P12518	0.32796	0.000174432	GE1279982	-0.0673341	0.5666
KCNJ13	POTASSIUM INWARDLY-RECTIFYING CHANNEL, SUBFAMILY J, MEMBER 13	NM_053608	A_42_P774782	0.046491	0.411683	GE13048	2.3191	5.39e-06
SLC20A2	SOLUTE CARRIER FAMILY 20, MEMBER 2	NM_017223	A_43_P10047	0.522448	1.34307e-05	GE1279335	0.0574156	0.7685
CTSD	CATHEPSIN D	NM_134334	A_43_P13241	0.553566	7.49579e-05	GE21105	0.519944	0.0203
COLEC12	COLLECTIN SUB-FAMILY MEMBER 12	NM_001025721	A_42_P598365	0.275745	0.000906844	GE1238694	0.167486	0.2102
ENC1	ECTODERMAL-NEURAL CORTEX 1	NM_001003401	A_43_P17474	-0.132075	0.0478422	GE1133361	-0.522841	0.0014
BCAN	BREVICAN	NM_001033665	A_42_P764157	0.0172183	0.799116	GE1144831	0.427177	0.0027
NFKB2	SIMILAR TO NUCLEAR FACTOR KAPPA B SUBUNIT P100	NM_001008349	A_43_P23273	-0.00533747	0.945342	GE1186357	0.582749	0.0014
CPG2	CPG2 PROTEIN	NM_001029909	A_42_P807826	-0.736439	0.000534461	GE1172171	-0.0414171	0.8549
LOC360627	SIMILAR TO 65KDA FK506-BINDING PROTEIN	NM_001014120	A_43_P20667	-0.0307673	0.571803	GE1196834	0.620962	0.0012
RENBP	RENIN BINDING PROTEIN	NM_031095	A_42_P837288	0.0793341	0.529422	GE21544	0.63385	0.0028
PTHR1	PARATHYROID HORMONE RECEPTOR 1	NM_020073	A_43_P12055	0.0105279	0.836175	GE20709	0.902498	0.0004
RCN2	RETICULOCALBIN 2	NM_017132	A_42_P707230	0.38622	0.000337433	GE1115724	0.330214	0.0522
CIB1	CALCIUM AND INTEGRIN BINDING 1 (CALMYRIN)	NM_031145	A_43_P12541	0.383956	0.000958051	GE21442	0.422341	0.0043
CIB1	CALCIUM AND INTEGRIN BINDING 1 (CALMYRIN)	NM_031145	A_43_P12541	0.383956	0.000958051	GE21442	0.422341	0.0043
MUCDHL	MUCIN AND CADHERIN LIKE	NM_138525	A_43_P13288	0.113857	0.215933	GE13480	0.882134	0.0027
AKAP2	A KINASE (PRKA) ANCHOR PROTEIN 2	NM_001011974	A_43_P21674	-0.261235	0.00471317	GE18586	0.0961269	0.4488
RPS8	RIBOSOMAL PROTEIN S8	NM_031706	A_42_P656468	0.246316	0.00487067	GE22095	0.103397	0.3597
ETFA	ELECTRON TRANSFERRING FLAVOPROTEIN, ALPHA POLYPEPTIDE	NM_001009668	A_42_P745378	0.329649	0.000678344	GE1254380	-0.140666	0.6172
CABP1	CALCIUM BINDING PROTEIN 1	NM_001033675	A_43_P13200	0.00171936	0.982981	GE21203	-0.490659	0.0003
BCAS1	BREAST CARCINOMA AMPLIFIED SEQUENCE 1	NM_145670	A_42_P831542	0.870392	7.47463e-07	GE1174323	1.09058	0.0318
FCNA	FICOLIN A	NM_031348	A_42_P780934	0.125947	0.225389	GE13092	0.892896	0.0005
KCNH1	POTASSIUM VOLTAGE-GATED CHANNEL, SUBFAMILY H (EAG-RELATED), MEMBER 1	NM_031742	A_43_P12658	-0.389858	0.000750309	GE1287672	-0.0111517	0.9553
GTF2F2	GENERAL TRANSCRIPTION FACTOR IIF, POLYPEPTIDE 2	NM_031042	A_42_P678263	0.037683	0.499029	GE1181980	-0.507788	0.003
CD82	KANGAI 1	NM_031797	A_42_P739970	0.394855	0.00385109	GE1188959	-0.0388953	0.8966
CLSTN2	CALSYNTENIN 2	NM_134377	A_43_P15490	-0.39487	0.00107987	GE1113381	-0.292475	0.1877
SLC16A1	SOLUTE CARRIER FAMILY 16 (MONOCARBOXYLIC ACID TRANSPORTERS), MEMBER 1	NM_012716	A_43_P11528	-0.0200424	0.760421	GE19920	0.83212	7.23e-05
PGRMC1	PROGESTERONE RECEPTOR MEMBRANE COMPONENT 1	NM_021766	A_42_P674786	0.274233	0.000357006	GE21461	-0.0988145	0.521
GEFT	RAC/CDC42 EXCHANGE FACTOR	NM_199395	A_43_P17978	-0.327356	0.00121122	GE1174035	-0.144808	0.2992
RPL28	RIBOSOMAL PROTEIN L28	NM_022697	A_43_P12302	0.244943	0.00225421	GE16392	-0.202572	0.1947
RCN2	RETICULOCALBIN 2	NM_017132	A_42_P707230	0.38622	0.000337433	GE1212797	-0.0906493	0.6442
GSN	GELSOLIN	NM_001004080	A_43_P10899	NA	NA	GE1306001	0.973281	4.01e-05
GIT2	SIMILAR TO GIT2 PROTEIN	NM_001005553	A_43_P18546	-0.0225105	0.743619	GE1269429	0.890641	0.0009
LOC290549	HEAT SHOCK PROTEIN	NM_207589	A_42_P711641	0.254099	4.13607e-05	GE1139481	0.127633	0.5454
C11ORF8H	PUTATIVE C11ORF8 HOMOLOG (HUMAN)	NM_198778	A_43_P17155	-0.643543	0.000118699	GE1146866	-0.236673	0.2646
SLC20A2	SOLUTE CARRIER FAMILY 20, MEMBER 2	NM_017223	A_43_P10047	0.522448	1.34307e-05	GE1158984	0.154583	0.3023
ATP2B1	ATPASE, CA++ TRANSPORTING, PLASMA MEMBRANE 1	NM_053311	A_43_P12761	-0.383491	0.000470684	GE19573	-0.233108	0.0499
SPSB2	GENE RICH CLUSTER, C9 GENE	NM_001009660	A_43_P20639	0.0264187	0.629412	GE1131878	0.646347	0.0003
RETSAT	ALL-TRANS-13,14-DIHYDRORETINOL SATURASE	NM_145084	A_42_P835630	0.00874289	0.844987	GE18154	0.497842	0.0024
HSPB8	HEAT SHOCK 22KDA PROTEIN 8	NM_053612	A_43_P12870	-0.0704545	0.446143	GE16019	1.1151	2.89e-06
GNG8	GUANINE NUCLEOTIDE BINDING PROTEIN (G PROTEIN), GAMMA 8 SUBUNIT	NM_139185	A_43_P13371	-0.0252693	0.538637	GE19655	0.695994	0.0003
CDH19	CADHERIN 19, TYPE 2	NM_001009448	A_43_P13646	0.10133	0.133977	GE1126702	1.98885	1.1e-06
RGD1306873	SIMILAR TO RIKEN CDNA 2210010N04 GENE	NM_001037191	A_43_P21138	0.0495831	0.350586	GE16043	-0.379883	0.0039
GRIK5	GLUTAMATE RECEPTOR, IONOTROPIC, KAINATE 5	NM_017262	A_43_P11887	-0.304648	0.000797534	GE1100475	-0.149761	0.5078
PCSK2	PROPROTEIN CONVERTASE SUBTILISIN/KEXIN TYPE 2	NM_012746	A_43_P11544	-0.41839	0.00279251	GE1293991	-0.0368218	0.8686
ENPP2	ECTONUCLEOTIDE PYROPHOSPHATASE/PHOSPHODIESTERASE 2	NM_057104	A_43_P13028	-0.0728593	0.396224	GE19483	0.93327	0.0012
NECAP2	UNKNOWN (PROTEIN FOR MGC:72598)	NM_199096	A_43_P17830	0.0120358	0.796603	GE1236131	0.520749	0.0023
ATP2B1	ATPASE, CA++ TRANSPORTING, PLASMA MEMBRANE 1	NM_053311	A_43_P12761	-0.383491	0.000470684	GE1135439	-0.169907	0.4594
SCD2	STEAROYL-COENZYME A DESATURASE 2	NM_031841	A_42_P813567	0.389115	0.00031668	GE13104	0.0284277	0.8594
KCND2	POTASSIUM VOLTAGE GATED CHANNEL, SHAL-RELATED FAMILY, MEMBER 2	NM_031730	A_42_P539787	-0.398203	0.000212282	GE1131828	0.245496	0.2907
PCSK2	PROPROTEIN CONVERTASE SUBTILISIN/KEXIN TYPE 2	NM_012746	A_43_P11544	-0.41839	0.00279251	GE1241149	-0.00173227	0.9921
NFKB2	SIMILAR TO NUCLEAR FACTOR KAPPA B SUBUNIT P100	NM_001008349	A_43_P18492	-0.0385433	0.470039	GE1186357	0.582749	0.0014
SAMSN1	SAM DOMAIN, SH3 DOMAIN AND NUCLEAR LOCALISATION SIGNALS, 1	NM_130821	A_42_P767031	0.072101	0.177265	GE1204577	1.29971	0.0039
INPP5D	INOSITOL POLYPHOSPHATE-5-PHOSPHATASE D	NM_019311	A_43_P12016	-0.0157266	0.745327	GE20655	0.676087	0.0042
F10	COAGULATION FACTOR X	NM_017143	A_42_P504656	-0.00928011	0.881495	GE20371	1.4499	8.46e-05
SCARB2	CD36 ANTIGEN (COLLAGEN TYPE I RECEPTOR, THROMBOSPONDIN RECEPTOR)-LIKE 2	NM_054001	A_42_P781535	0.231093	0.00320561	GE1287049	0.119821	0.5001
GEFT	RAC/CDC42 EXCHANGE FACTOR	NM_199395	A_42_P588915	-0.636624	9.97588e-06	GE1174035	-0.144808	0.2992
LOC313519	SIMILAR TO RIKEN CDNA 5330440M15	NM_001014067	A_43_P20779	-0.00335314	0.958489	GE16583	0.509747	0.0021
APOD	APOLIPOPROTEIN D	NM_012777	A_43_P10347	-0.0215562	0.664507	GE1126219	1.25882	4.87e-06
C4A	COMPLEMENT COMPONENT 4A	NM_031504	A_43_P18711	-0.00693465	0.912288	GE1211637	1.42417	1.56e-06
CD37	CD37 ANTIGEN	NM_017124	A_43_P11829	0.034074	0.555836	GE20357	0.981122	0.0002
CD86	CD86 ANTIGEN	NM_020081	A_43_P12058	0.0023781	0.976803	GE20716	1.11237	0.0032
LCP1	LYMPHOCYTE CYTOSOLIC PROTEIN 1	NM_001012044	A_43_P22080	0.0246018	0.752192	GE1228066	1.0536	0.0006
ZMYND10	ZINC FINGER, MYND DOMAIN-CONTAINING 10	NM_001004284	A_43_P19567	0.0367693	0.577553	GE1147767	0.799253	0.0012
RGD1303232	PHYTN_DEHYDRO AND PYR_REDOX DOMAIN CONTAINING PROTEIN RGD1303232	NM_001004261	A_43_P19486	0.0568779	0.327827	GE14038	0.625364	0.0005
RXRG	RETINOID X RECEPTOR GAMMA	NM_031765	A_43_P15925	-0.0667305	0.426203	GE21319	-0.607793	0.0039
PVRL2	POLIOVIRUS RECEPTOR-RELATED 2 (HERPESVIRUS ENTRY MEDIATOR B)	NM_001012064	A_43_P17054	-0.0241695	0.78743	GE12514	0.697596	0.0004
SLC20A2	SOLUTE CARRIER FAMILY 20, MEMBER 2	NM_017223	A_43_P10047	0.522448	1.34307e-05	GE1296629	0.257735	0.3034
LCP1	LYMPHOCYTE CYTOSOLIC PROTEIN 1	NM_001012044	A_43_P20376	NA	NA	GE1228066	1.0536	0.0006
TIM2	T-CELL IMMUNOGLOBULIN AND MUCIN DOMAIN CONTAINING 2	NM_001013855	A_43_P18639	0.134669	0.0773391	GE1108252	1.81762	0.0028
RGD1359713	HYPOTHETICAL RNA BINDING PROTEIN RGD1359713	NM_001005882	A_42_P541618	0.149811	0.119952	GE1128780	0.650305	0.0019
EMR1	EGF-LIKE MODULE CONTAINING, MUCIN-LIKE, HORMONE RECEPTOR-LIKE SEQUENCE 1	NM_001007557	A_43_P19985	0.0122163	0.820573	GE1292466	0.861003	0.0004
RXRG	RETINOID X RECEPTOR GAMMA	NM_031765	A_43_P15925	-0.0667305	0.426203	GE21527	-0.765376	0.0027
GLUD1	GLUTAMATE DEHYDROGENASE 1	NM_012570	A_42_P660048	0.407842	0.000194885	GE19830	0.229465	0.1616
RPL37	RIBOSOMAL PROTEIN L37	NM_031106	A_43_P12513	0.234142	0.00197129	GE1250875	0.0377336	0.8351
GGTL3	GAMMA-GLUTAMYLTRANSFERASE-LIKE 3	NM_130423	A_42_P660698	-0.333669	0.000138915	GE1262984	0.231432	0.4903
C11ORF8H	PUTATIVE C11ORF8 HOMOLOG (HUMAN)	NM_198778	A_43_P17155	-0.643543	0.000118699	GE1162039	0.19131	0.3832
LOC501110	SIMILAR TO GLUTATHIONE S-TRANSFERASE A1 (GTH1) (HA SUBUNIT 1) (GST-EPSILON) (GSTA1-1) (GST CLASS-ALPHA)	NM_001024361	A_42_P623733	0.300815	0.000973908	GE1283744	0.20364	0.4795
LMO7	LIM DOMAIN ONLY PROTEIN 7	NM_001001515	A_42_P469142	-0.365535	0.00388263	GE1305580	-0.0539429	0.8013
HCRT	HYPOCRETIN	NM_013179	A_43_P11745	-0.0321217	0.66675	GE20229	3.17445	0.0016
CD44	CD44 ANTIGEN	NM_012924	A_43_P16007	-0.136434	0.020333	GE21378	1.4197	3.07e-05
APOD	APOLIPOPROTEIN D	NM_012777	A_43_P11389	-0.00421414	0.915867	GE1126219	1.25882	4.87e-06
KCNH1	POTASSIUM VOLTAGE-GATED CHANNEL, SUBFAMILY H (EAG-RELATED), MEMBER 1	NM_031742	A_43_P12658	-0.389858	0.000750309	GE1108954	-0.173319	0.2998
RXRG	RETINOID X RECEPTOR GAMMA	NM_031765	A_43_P15925	-0.0667305	0.426203	GE17943	-0.801632	0.0007
ATP2B1	ATPASE, CA++ TRANSPORTING, PLASMA MEMBRANE 1	NM_053311	A_43_P12761	-0.383491	0.000470684	GE1173578	-0.129734	0.5379
CD1D1	CD1D1 ANTIGEN	NM_017079	A_42_P773816	0.204202	0.00364054	GE20325	2.65931	0.0513
C11ORF8H	PUTATIVE C11ORF8 HOMOLOG (HUMAN)	NM_198778	A_43_P17155	-0.643543	0.000118699	GE1154818	-0.0506518	0.8225
ANKRD13	ANKYRIN REPEAT DOMAIN 13	NM_001012148	A_42_P499273	0.347249	0.000928426	GE1269615	-0.180168	0.3354
NFKB2	SIMILAR TO NUCLEAR FACTOR KAPPA B SUBUNIT P100	NM_001008349	A_42_P658264	-0.0545724	0.443908	GE1186357	0.582749	0.0014
BRINP2	BMP/RETINOIC ACID-INDUCIBLE NEURAL-SPECIFIC PROTEIN 2	NM_173115	A_42_P828538	-0.279489	0.000916599	GE1185573	0.0325241	0.8889
REN1	RENIN 1	NM_012642	A_42_P623358	0.033294	0.632306	GE21429	0.891575	0.0016
PDE10A	PHOSPHODIESTERASE 10A	NM_022236	A_42_P584045	-0.280584	0.00367522	GE1256473	-0.00173227	0.9921
TXNIP	UPREGULATED BY 1,25-DIHYDROXYVITAMIN D-3	NM_001008767	A_43_P17829	-0.139539	0.0217588	GE20904	1.70615	3.01e-07
LOC290549	HEAT SHOCK PROTEIN	NM_207589	A_42_P711641	0.254099	4.13607e-05	GE17557	0.091666	0.4665
RGD1309360	HYPOTHETICAL LOC294715	NM_001012347	A_43_P22144	-0.22146	0.00220634	GE12987	0.118094	0.2923
DDAH2	DIMETHYLARGININE DIMETHYLAMINOHYDROLASE 2	NM_212532	A_42_P828102	0.272952	6.77475e-05	GE1255632	0.307778	0.1258
HIVEP2	HUMAN IMMUNODEFICIENCY VIRUS TYPE I ENHANCER BINDING PROTEIN 2	NM_024137	A_42_P601021	-0.273772	0.00377744	GE1158524	0.100843	0.7207
RELA	V-REL RETICULOENDOTHELIOSIS VIRAL ONCOGENE HOMOLOG A (AVIAN)	NM_199267	A_43_P15858	-0.075978	0.422044	GE18206	0.573278	0.0024
HS3ST2	HEPARAN SULFATE (GLUCOSAMINE) 3-O-SULFOTRANSFERASE 2	NM_181370	A_43_P22151	0.0341608	0.585035	GE1147162	1.94804	0.0038
SPON1	SPONDIN 1	NM_172067	A_43_P13420	-0.290143	0.00466768	GE1278456	0.252658	0.3013
ECEL1	METALLOPEPTIDASE	NM_021776	A_43_P12124	0.264254	0.00592937	GE20809	-0.165046	0.3267
MOG	MYELIN OLIGODENDROCYTE GLYCOPROTEIN	NM_022668	A_43_P12283	0.863365	2.06947e-06	GE1107130	-0.149121	0.2405
PPP3CA	PROTEIN PHOSPHATASE 3, CATALYTIC SUBUNIT, ALPHA ISOFORM	NM_017041	A_43_P11790	-0.416264	0.000824001	GE1136653	-0.233617	0.1542
RELA	V-REL RETICULOENDOTHELIOSIS VIRAL ONCOGENE HOMOLOG A (AVIAN)	NM_199267	A_43_P15858	-0.075978	0.422044	GE1280732	0.591488	0.003
CPG2	CPG2 PROTEIN	NM_001029909	A_42_P807826	-0.736439	0.000534461	GE1243570	-0.271949	0.3661
ALCAM	ACTIVATED LEUKOCYTE CELL ADHESION MOLECULE	NM_031753	A_43_P12662	0.124274	0.0276094	GE13032	0.434775	0.0041
LMO7	LIM DOMAIN ONLY PROTEIN 7	NM_001001515	A_42_P469142	-0.365535	0.00388263	GE1221945	-0.105628	0.7249
BRINP2	BMP/RETINOIC ACID-INDUCIBLE NEURAL-SPECIFIC PROTEIN 2	NM_173115	A_42_P828538	-0.279489	0.000916599	GE1230794	-0.231752	0.4346
CPG2	CPG2 PROTEIN	NM_001029909	A_42_P807826	-0.736439	0.000534461	GE1262951	0.0926134	0.7813
ARG2	ARGINASE 2	NM_019168	A_43_P11960	0.285773	0.00472478	GE1304842	-0.183605	0.2645
PRDX2	PEROXIREDOXIN 2	NM_017169	A_42_P568992	0.212138	0.000337549	GE20391	0.0515809	0.6342
COL23A1	PROCOLLAGEN, TYPE XXIII, ALPHA 1	NM_181636	NA	NA	NA	GE1254015	0.932364	0.0001
DCI	DODECENOYL-COENZYME A DELTA ISOMERASE	NM_017306	NA	NA	NA	GE1254568	0.398022	0.0031
SPON1	SPONDIN 1	NM_172067	A_43_P13420	-0.290143	0.00466768	GE1223983	NA	NA
RT1-A2	RT1 CLASS IB, LOCUS AW2	NM_012645	A_43_P11501	0.71659	0.000137807	GE1293979	NA	NA
CDW92	CDW92 ANTIGEN	NM_001033852	A_42_P657606	0.714763	3.65984e-06	GE14031	NA	NA
ADCY4	ADENYLATE CYCLASE 4	NM_019285	A_43_P15384	-0.153869	0.148564	GE20636	1.03182	4.13e-05
C3	COMPLEMENT COMPONENT 3	NM_016994	A_42_P500681	0.787135	0.000930522	GE1253181	NA	NA
BLNK	B-CELL LINKER	NM_001025767	A_42_P507455	0.459678	0.00156846	GE1146129	NA	NA
CP	CERULOPLASMIN	NM_012532	A_43_P11448	0.0822199	0.306126	GE19806	1.9735	4.46e-10
LRRC7	LEUCINE RICH REPEAT CONTAINING 7	NM_057142	A_43_P15485	-0.24697	0.000276551	GE1168032	NA	NA
SPARCL1	SPARC-LIKE 1 (MAST9, HEVIN)	NM_012946	A_42_P683634	0.447441	0.000385858	GE20075	NA	NA
RPS24	RIBOSOMAL PROTEIN S24	NM_031112	A_43_P12518	0.32796	0.000174432	GE1302880	NA	NA
DECR1	2,4-DIENOYL COA REDUCTASE 1, MITOCHONDRIAL	NM_057197	A_43_P14197	0.309472	0.000712742	GE1283067	NA	NA
SP140	SP140 NUCLEAR BODY PROTEIN	NM_001012133	NA	NA	NA	GE1248639	0.733615	0.0004
DBI	DIAZEPAM BINDING INHIBITOR	NM_031853	A_43_P14621	0.521476	0.000291747	GE1171596	0.528971	0.0001
METTL7A	SIMILAR TO DKFZP586A0522 PROTEIN	NM_001037355	NA	NA	NA	GE12292	0.601221	0.0011
LCP1	LYMPHOCYTE CYTOSOLIC PROTEIN 1	NM_001012044	A_43_P11353	0.625374	0.000129618	GE1228066	1.0536	0.0006
CDW92	CDW92 ANTIGEN	NM_001033852	A_42_P657606	0.714763	3.65984e-06	GE15717	NA	NA
TCF4	TRANSCRIPTION FACTOR 4	NM_053369	A_43_P13828	-0.338693	0.00041039	GE1258402	NA	NA
DNAH1	DYNEIN, AXONEMAL, HEAVY POLYPEPTIDE 1	NM_001033655	NA	NA	NA	GE1219879	1.7066	0.0012
SLC17A7	SOLUTE CARRIER FAMILY 17 (SODIUM-DEPENDENT INORGANIC PHOSPHATE COTRANSPORTER), MEMBER 7	NM_053859	A_43_P12962	-0.417841	0.000360073	GE1163759	NA	NA
PPP3CA	PROTEIN PHOSPHATASE 3, CATALYTIC SUBUNIT, ALPHA ISOFORM	NM_017041	A_43_P11790	-0.416264	0.000824001	GE1123921	NA	NA
PRDX2	PEROXIREDOXIN 2	NM_017169	A_42_P568992	0.212138	0.000337549	GE21893	0.0380147	0.756
MPDZ	MULTIPLE PDZ DOMAIN PROTEIN	NM_019196	A_43_P14529	-0.395173	0.000247946	GE20577	NA	NA
PHGDH	3-PHOSPHOGLYCERATE DEHYDROGENASE	NM_031620	A_42_P710738	0.456934	0.000297688	GE1260634	NA	NA
RSNL2	SIMILAR TO RIKEN CDNA 4833417L20	NM_001013942	A_43_P23317	-0.270559	0.00116897	GE1130722	NA	NA
S100A10	S100 CALCIUM BINDING PROTEIN A10 (CALPACTIN)	NM_031114	A_43_P12519	0.318696	0.00215374	GE19572	0.132774	0.5888
NDRG2	N-MYC DOWNSTREAM REGULATED GENE 2	NM_133583	A_42_P547616	0.385551	0.00271603	GE1144096	NA	NA
GLUD1	GLUTAMATE DEHYDROGENASE 1	NM_012570	A_43_P14157	0.42083	0.000236304	GE1165677	0.492417	0.0025
NA	NA	NM_001077656	NA	NA	NA	GE1280639	1.16395	0.0028
NA	NA	NM_001047085	A_42_P838973	0.426466	0.000186742	GE1106648	NA	NA
GPC4	SIMILAR TO GLYPICAN 4	NM_001014108	A_43_P21658	-0.270097	0.000500334	GE1286745	NA	NA
PRSS35	PROTEASE, SERINE, 35	NM_001008560	NA	NA	NA	GE1125898	-0.868806	9.18e-05
DECR1	2,4-DIENOYL COA REDUCTASE 1, MITOCHONDRIAL	NM_057197	A_42_P526030	0.342736	0.000233588	GE1283067	NA	NA
CLECSF6	C-TYPE (CALCIUM DEPENDENT, CARBOHYDRATE RECOGNITION DOMAIN) LECTIN, SUPERFAMILY MEMBER 6	NM_001005899	NA	NA	NA	GE18382	0.781653	0.0009
SDFR1	STROMAL CELL DERIVED FACTOR RECEPTOR 1	NM_019380	A_43_P12047	-0.277025	0.00208553	GE1210217	NA	NA
GLRA2	GLYCINE RECEPTOR, ALPHA 2 SUBUNIT	NM_012568	NA	NA	NA	GE19828	-0.714302	0.0035
PTMA	PROTHYMOSIN ALPHA	NM_021740	A_42_P486763	0.372307	0.000632496	GE1133397	NA	NA
ANXA1	ANNEXIN A1	NM_012904	A_43_P11614	0.834284	0.00472136	GE20046	NA	NA
GGTA1	GLYCOPROTEIN GALACTOSYLTRANSFERASE ALPHA 1, 3	NM_145674	A_43_P21803	NA	NA	GE1292830	0.90134	0.0002
ARHGDIB	RHO, GDP DISSOCIATION INHIBITOR (GDI) BETA	NM_001009600	NA	NA	NA	GE16644	0.639695	0.0023
LAMB2	LAMININ, BETA 2	NM_012974	A_43_P11640	0.333453	0.00536976	GE20094	NA	NA
CD1D1	CD1D1 ANTIGEN	NM_017079	A_42_P773816	0.204202	0.00364054	GE1132329	NA	NA
TPT1	TUMOR PROTEIN, TRANSLATIONALLY-CONTROLLED 1	NM_053867	A_43_P14300	0.306393	0.0049836	GE20884	0.203765	0.0312
GFRA2	GLIAL CELL LINE DERIVED NEUROTROPHIC FACTOR FAMILY RECEPTOR ALPHA 2	NM_012750	A_42_P791436	0.58354	0.000363328	GE19941	NA	NA
LOC361596	SIMILAR TO NADP+-SPECIFIC ISOCITRATE DEHYDROGENASE	NM_001014161	NA	NA	NA	GE1220366	0.490159	0.0041
SLC20A2	SOLUTE CARRIER FAMILY 20, MEMBER 2	NM_017223	A_43_P10047	0.522448	1.34307e-05	GE21699	NA	NA
ID3	INHIBITOR OF DNA BINDING 3	NM_013058	NA	NA	NA	GE20145	1.26255	1.5e-08
LMO7	LIM DOMAIN ONLY PROTEIN 7	NM_001001515	A_42_P469142	-0.365535	0.00388263	GE1228635	NA	NA
MAP2K1	MITOGEN ACTIVATED PROTEIN KINASE KINASE 1	NM_031643	A_42_P638191	-0.31804	0.000864335	GE22249	-0.242465	0.0465
ACCN1	AMILORIDE-SENSITIVE CATION CHANNEL 1, NEURONAL (DEGENERIN)	NM_001034014	A_42_P473253	0.465598	0.00123558	GE20042	NA	NA
RGD1311260	HYPOTHETICAL LOC303211	NM_001013967	NA	NA	NA	GE14205	0.799419	8.09e-05
ITM2B	INTEGRAL MEMBRANE PROTEIN 2B	NM_001006963	A_42_P688583	0.236898	0.00345544	GE1135235	0.0911243	0.6652
GPR37	G PROTEIN-COUPLED RECEPTOR 37	NM_057201	A_42_P803529	0.410654	0.000108722	GE13315	NA	NA
PPP3CA	PROTEIN PHOSPHATASE 3, CATALYTIC SUBUNIT, ALPHA ISOFORM	NM_017041	A_43_P11790	-0.416264	0.000824001	GE1303378	NA	NA
ACCN1	AMILORIDE-SENSITIVE CATION CHANNEL 1, NEURONAL (DEGENERIN)	NM_001034014	A_42_P473253	0.465598	0.00123558	GE1243949	NA	NA
PPP3CA	PROTEIN PHOSPHATASE 3, CATALYTIC SUBUNIT, ALPHA ISOFORM	NM_017041	A_42_P645092	-0.585464	8.28387e-06	GE1136653	-0.233617	0.1542
PLCB4	PHOSPHOLIPASE C, BETA 4	NM_024353	A_42_P537534	0.484608	0.00017717	GE1203515	NA	NA
GLUD1	GLUTAMATE DEHYDROGENASE 1	NM_012570	A_43_P14157	0.42083	0.000236304	GE1150205	NA	NA
TCF4	TRANSCRIPTION FACTOR 4	NM_053369	A_43_P13828	-0.338693	0.00041039	GE1287722	NA	NA
EMP2	EPITHELIAL MEMBRANE PROTEIN 2	NM_001007721	A_42_P593153	0.264044	0.00103901	GE17738	NA	NA
TIMP2	TISSUE INHIBITOR OF METALLOPROTEINASE 2	NM_021989	A_43_P12142	0.610635	1.54062e-05	GE1233465	NA	NA
PLD1	PHOSPHOLIPASE D1	NM_030992	A_42_P567164	0.274426	0.000325328	GE1291208	NA	NA
FATH	FAT TUMOR SUPPRESSOR HOMOLOG (DROSOPHILA)	NM_031819	A_42_P592144	0.457007	0.00144499	GE1199711	NA	NA
GABRB1	GAMMA-AMINOBUTYRIC ACID RECEPTOR, SUBUNIT BETA 1	NM_012956	A_43_P11632	-0.242093	0.00435707	GE22112	NA	NA
TSPAN2	TETRASPAN 2	NM_022589	A_42_P692798	0.841852	1.10325e-05	GE1235296	NA	NA
SLC7A3	SOLUTE CARRIER FAMILY 7 (CATIONIC AMINO ACID TRANSPORTER, Y+ SYSTEM), MEMBER 3	NM_017217	A_42_P700209	0.534667	0.00482976	GE20429	NA	NA
LOC502894	HYPOTHETICAL PROTEIN LOC502894	NM_001025064	A_42_P675139	-0.492245	0.000285526	GE1192166	NA	NA
CLIC1	CHLORIDE INTRACELLULAR CHANNEL 1	NM_001002807	NA	NA	NA	GE1265065	0.703278	0.0009
EGR2	EARLY GROWTH RESPONSE 2	NM_053633	NA	NA	NA	GE13105	0.69893	0.0049
LCP2	LYMPHOCYTE CYTOSOLIC PROTEIN 2	NM_130421	A_42_P671389	0.206584	0.00235199	GE1134521	NA	NA
BAIAP2	BRAIN-SPECIFIC ANGIOGENESIS INHIBITOR 1-ASSOCIATED PROTEIN 2	NM_057196	A_43_P13057	-0.255072	3.06209e-05	GE18820	NA	NA
LAPTM5	LYSOSOMAL-ASSOCIATED PROTEIN TRANSMEMBRANE 5	NM_053538	A_43_P11236	0.463007	0.000147624	GE13135	0.67229	0.0033
FNDC1	FIBRONECTIN TYPE III DOMAIN CONTAINING 1 (PREDICTED)	NM_001038615	NA	NA	NA	GE15296	1.55895	3.84e-05
CST3	CYSTATIN C	NM_012837	A_42_P596305	0.524601	0.000105813	GE1203759	NA	NA
SLC6A1	SOLUTE CARRIER FAMILY 6 (NEUROTRANSMITTER TRANSPORTER, GABA), MEMBER 1	NM_024371	A_42_P713231	0.356288	0.000577988	GE1202030	NA	NA
PRDX2	PEROXIREDOXIN 2	NM_017169	A_43_P14135	0.207369	0.00389575	GE1265698	NA	NA
SERPINB1A	SERINE (OR CYSTEINE) PROTEINASE INHIBITOR, CLADE B, MEMBER 1A	NM_001031642	NA	NA	NA	GE1177727	0.987976	5.36e-05
FILIP1	FILAMIN A INTERACTING PROTEIN 1	NM_145682	A_42_P596942	-0.385519	0.00318572	GE17099	NA	NA
RPN2	RIBOPHORIN II	NM_031698	A_42_P755806	0.214369	0.00281236	GE1226815	0.259785	0.0516
GUSB	GLUCURONIDASE, BETA	NM_017015	A_42_P696769	0.00456507	0.961434	GE20275	0.784253	0.0001
PTGDS	PROSTAGLANDIN D2 SYNTHASE	NM_013015	A_43_P15529	1.0912	0.000884345	GE20119	1.85348	3.44e-05
SP140	SP140 NUCLEAR BODY PROTEIN	NM_001012133	NA	NA	NA	GE18900	1.03555	7.33e-06
CFH	COMPLEMENT COMPONENT FACTOR H	NM_130409	A_42_P819656	0.382127	0.00392861	GE1161723	0.584193	0.0008
RT1-A2	RT1 CLASS IB, LOCUS AW2	NM_012645	A_43_P11501	0.71659	0.000137807	GE1249249	NA	NA
RPS23	RIBOSOMAL PROTEIN S23	NM_078617	A_42_P565385	0.32606	0.00151818	GE1111303	0.171591	0.1567
RT1-CE10	RT1 CLASS I, CE10	NM_001008833	NA	NA	NA	GE1246348	1.04383	6.31e-05
FTH1	FERRITIN, HEAVY POLYPEPTIDE 1	NM_012848	A_43_P13974	0.420896	0.00255428	GE20007	0.402395	0.005
HOD	HOMEOBOX ONLY DOMAIN	NM_133621	A_42_P658986	0.356456	0.00310647	GE13933	0.896698	1.09e-06
FXYD3	FXYD DOMAIN-CONTAINING ION TRANSPORT REGULATOR 3	NM_172317	NA	NA	NA	GE13647	1.39105	1.79e-08
GGTA1	GLYCOPROTEIN GALACTOSYLTRANSFERASE ALPHA 1, 3	NM_145674	A_43_P21803	NA	NA	GE1191437	0.960289	0.0002
MAP2K1	MITOGEN ACTIVATED PROTEIN KINASE KINASE 1	NM_031643	A_42_P638191	-0.31804	0.000864335	GE1282407	-0.0218044	0.8611
CPG2	CPG2 PROTEIN	NM_001029909	A_42_P807826	-0.736439	0.000534461	GE1248643	NA	NA
PLSCR4	PHOSPHOLIPID SCRAMBLASE 4	NM_001012000	NA	NA	NA	GE1184188	0.609377	0.0005
RPL30	RIBOSOMAL PROTEIN L30	NM_022699	A_43_P12303	0.31548	0.000681993	GE1228128	-0.123905	0.4252
ARG2	ARGINASE 2	NM_019168	A_43_P11960	0.285773	0.00472478	GE1218643	-0.268122	0.2678
MPDZ	MULTIPLE PDZ DOMAIN PROTEIN	NM_019196	A_43_P14529	-0.395173	0.000247946	GE1179418	NA	NA
GPC4	SIMILAR TO GLYPICAN 4	NM_001014108	A_42_P547976	-0.672418	0.000335931	GE1286745	NA	NA
SLC6A9	SOLUTE CARRIER FAMILY 6 (NEUROTRANSMITTER TRANSPORTER, GLYCINE), MEMBER 9	NM_053818	NA	NA	NA	GE1272697	0.890563	0.0004
FKBP1A	FK506 BINDING PROTEIN 1A	NM_013102	A_43_P11287	-0.240559	0.00183154	GE1127868	-0.207728	0.1
PLEK	PLECKSTRIN	NM_001025750	NA	NA	NA	GE1163815	0.930548	0.0012
GABBR2	G PROTEIN-COUPLED RECEPTOR 51	NM_031802	A_42_P467277	-0.37623	9.83778e-05	GE1266460	NA	NA
RGD1309360	HYPOTHETICAL LOC294715	NM_001012347	A_43_P22144	-0.22146	0.00220634	GE1165033	NA	NA
PGRMC1	PROGESTERONE RECEPTOR MEMBRANE COMPONENT 1	NM_021766	A_42_P674786	0.274233	0.000357006	GE1300019	NA	NA
GALC	GALACTOSYLCERAMIDASE	NM_001005888	A_43_P18701	-0.0772182	0.168127	GE1209107	0.480989	0.0028
MYO1D	MYOSIN ID	NM_012983	A_42_P730229	0.880898	3.14057e-05	GE1246654	1.14757	0.0002
GLUD1	GLUTAMATE DEHYDROGENASE 1	NM_012570	A_43_P14157	0.42083	0.000236304	GE19830	0.229465	0.1616
LAPTM5	LYSOSOMAL-ASSOCIATED PROTEIN TRANSMEMBRANE 5	NM_053538	A_43_P11236	0.463007	0.000147624	GE12766	0.70044	0.001
FTL1	FERRITIN LIGHT CHAIN 1	NM_022500	NA	NA	NA	GE1266242	0.566279	0.0004
MAN1A_PREDICTED	MANNOSIDASE 1, ALPHA (PREDICTED)	NM_001033656	A_42_P724231	0.394781	0.00140675	GE1300050	NA	NA
LOC501665	SIMILAR TO PROTEIN P3	NM_001024368	NA	NA	NA	GE1137732	1.13665	0.0046
CSRP1	CYSTEINE AND GLYCINE-RICH PROTEIN 1	NM_017148	A_43_P11838	0.609469	2.27043e-05	GE1294403	NA	NA
RT1-A2	RT1 CLASS IB, LOCUS AW2	NM_012645	A_43_P11501	0.71659	0.000137807	GE1124806	NA	NA
SAA4	HERMANSKY-PUDLAK SYNDROME 5	NM_001009478	A_42_P841623	0.203049	0.000320622	GE1103615	NA	NA
TMEM98	SIMILAR TO RIKEN CDNA 6530411B15	NM_001007672	NA	NA	NA	GE15924	1.03097	0.0005
DGKA	DIACYLGLYCEROL KINASE, ALPHA (80 KDA)	NM_080787	A_42_P715592	-0.227907	0.00341848	GE1250335	NA	NA
STS	STEROID SULFATASE	NM_012661	A_42_P702550	0.245259	0.0208935	GE19885	0.541713	0.0004
PRSS35	PROTEASE, SERINE, 35	NM_001008560	NA	NA	NA	GE1289191	-0.839854	0.0002
MPDZ	MULTIPLE PDZ DOMAIN PROTEIN	NM_019196	A_43_P14529	-0.395173	0.000247946	GE1270671	-0.258943	0.3877
MGC72974	UNKNOWN (PROTEIN FOR MGC:72974)	NM_198772	NA	NA	NA	GE1250579	0.728051	0.0002
TMEM10	TRANSMEMBRANE PROTEIN 10	NM_001017386	NA	NA	NA	GE1216844	1.19774	0.0007
MBP	MYELIN BASIC PROTEIN	NM_001025289	A_43_P11782	1.05772	1.41712e-05	GE1154421	NA	NA
MYO1D	MYOSIN ID	NM_012983	A_42_P730229	0.880898	3.14057e-05	GE1271873	NA	NA
HOD	HOMEOBOX ONLY DOMAIN	NM_133621	A_42_P658986	0.356456	0.00310647	GE1171588	NA	NA
BAIAP2	BRAIN-SPECIFIC ANGIOGENESIS INHIBITOR 1-ASSOCIATED PROTEIN 2	NM_057196	A_43_P13057	-0.255072	3.06209e-05	GE1228771	NA	NA
RGD1309360	HYPOTHETICAL LOC294715	NM_001012347	A_43_P22144	-0.22146	0.00220634	GE1264597	NA	NA
SPARCL1	SPARC-LIKE 1 (MAST9, HEVIN)	NM_012946	A_42_P683634	0.447441	0.000385858	GE1158572	NA	NA
RGS3	REGULATOR OF G-PROTEIN SIGNALLING 3	NM_019340	A_43_P12028	0.587519	0.000129976	GE1195156	NA	NA
UGP2	UDP-GLUCOSE PYROPHOSPHORYLASE 2	NM_001024743	A_42_P672480	0.209697	0.0016033	GE14248	NA	NA
RT1-A2	RT1 CLASS IB, LOCUS AW2	NM_012645	A_43_P11501	0.71659	0.000137807	GE13775	NA	NA
ATP2B1	ATPASE, CA++ TRANSPORTING, PLASMA MEMBRANE 1	NM_053311	A_43_P12761	-0.383491	0.000470684	GE1300652	NA	NA
FCGR2B	FC RECEPTOR, IGG, LOW AFFINITY IIB	NM_175756	A_42_P735417	0.700914	0.00199326	GE22185	0.911883	0.0019
CARHSP1	CALCIUM REGULATED HEAT STABLE PROTEIN 1	NM_152790	A_42_P775829	0.549585	8.94774e-05	GE1260678	NA	NA
FKBP1A	FK506 BINDING PROTEIN 1A	NM_013102	A_43_P11287	-0.240559	0.00183154	GE22031	-0.131155	0.2526
CALCB	CALCITONIN-RELATED POLYPEPTIDE, BETA	NM_138513	NA	NA	NA	GE1197193	-0.56918	0.0038
COLEC12	COLLECTIN SUB-FAMILY MEMBER 12	NM_001025721	A_42_P598365	0.275745	0.000906844	GE1110126	NA	NA
KCNA2	POTASSIUM VOLTAGE-GATED CHANNEL, SHAKER-RELATED SUBFAMILY, MEMBER 2	NM_012970	NA	NA	NA	GE19579	0.767146	4.33e-05
CATNA1	CATENIN (CADHERIN-ASSOCIATED PROTEIN), ALPHA 1, 102KDA	NM_001007145	A_42_P669549	0.519825	1.6135e-05	GE1273318	NA	NA
ENO2	ENOLASE 2, GAMMA	NM_139325	NA	NA	NA	GE1293166	0.996389	0.002
KITL	KIT LIGAND	NM_021843	A_43_P14111	-0.498805	0.00145723	GE1246772	NA	NA
PPP3CA	PROTEIN PHOSPHATASE 3, CATALYTIC SUBUNIT, ALPHA ISOFORM	NM_017041	A_42_P777177	-0.569726	1.7521e-06	GE1123921	NA	NA
PHYHIP	PHYTANOYL-COA HYDROXYLASE INTERACTING PROTEIN	NM_001017376	A_42_P547785	-0.543809	9.26399e-05	GE1258945	NA	NA
CFH	COMPLEMENT COMPONENT FACTOR H	NM_130409	A_42_P819656	0.382127	0.00392861	GE1175142	-0.235994	0.3336
PPP3CA	PROTEIN PHOSPHATASE 3, CATALYTIC SUBUNIT, ALPHA ISOFORM	NM_017041	A_42_P645092	-0.585464	8.28387e-06	GE1198331	NA	NA
LOC498365	HYPOTHETICAL PROTEIN LOC498365	NM_001025138	NA	NA	NA	GE1167695	0.679604	0.0032
CLDN11	CLAUDIN 11	NM_053457	A_43_P12808	0.436534	0.000309405	GE13590	NA	NA
TCF4	TRANSCRIPTION FACTOR 4	NM_053369	A_43_P13828	-0.338693	0.00041039	GE1110686	NA	NA
CDW92	CDW92 ANTIGEN	NM_001033852	A_42_P657606	0.714763	3.65984e-06	GE1142288	NA	NA
SLC6A9	SOLUTE CARRIER FAMILY 6 (NEUROTRANSMITTER TRANSPORTER, GLYCINE), MEMBER 9	NM_053818	NA	NA	NA	GE1126789	0.817132	0.0002
CRYL1	CRYSTALLIN, LAMDA 1	NM_175757	NA	NA	NA	GE1133354	-0.553214	0.0002
PLCB4	PHOSPHOLIPASE C, BETA 4	NM_024353	A_42_P537534	0.484608	0.00017717	GE1162690	NA	NA
CLDN9	CLAUDIN 9	NM_001011889	NA	NA	NA	GE1186239	0.702658	0.0014
PPP3CA	PROTEIN PHOSPHATASE 3, CATALYTIC SUBUNIT, ALPHA ISOFORM	NM_017041	A_42_P645092	-0.585464	8.28387e-06	GE1123921	NA	NA
SLC27A2	SOLUTE CARRIER FAMILY 27 (FATTY ACID TRANSPORTER), MEMBER 2	NM_031736	A_43_P12655	0.262887	0.00135391	GE21616	NA	NA
PDE8A	PHOSPHODIESTERASE 8A	NM_198767	A_42_P802988	0.530701	1.76995e-05	GE1293463	NA	NA
CSRP1	CYSTEINE AND GLYCINE-RICH PROTEIN 1	NM_017148	A_43_P11838	0.609469	2.27043e-05	GE1176678	NA	NA
PPP3CA	PROTEIN PHOSPHATASE 3, CATALYTIC SUBUNIT, ALPHA ISOFORM	NM_017041	A_42_P645092	-0.585464	8.28387e-06	GE17365	-0.320306	0.1617
ALDH2	ALDEHYDE DEHYDROGENASE 2	NM_032416	A_43_P12726	0.533097	4.4372e-05	GE1233937	NA	NA
IDI1	ISOPENTENYL-DIPHOSPHATE DELTA ISOMERASE	NM_053539	A_43_P12843	-0.286237	0.00506213	GE14924	NA	NA
LAMP1	LYSOSOMAL MEMBRANE GLYCOPROTEIN 1	NM_012857	A_42_P526083	0.363469	0.00126248	GE1122166	NA	NA
TSPAN2	TETRASPAN 2	NM_022589	A_42_P692798	0.841852	1.10325e-05	GE1124435	NA	NA
PYCARD	APOPTOSIS-ASSOCIATED SPECK-LIKE PROTEIN CONTAINING A CARD	NM_172322	NA	NA	NA	GE15248	1.04278	0.0002
OSTF1	OSTEOCLAST STIMULATING FACTOR 1	NM_148892	A_42_P835665	0.332959	0.000429051	GE1303283	NA	NA
LOC309891	SIMILAR TO SEPTIN 10 ISOFORM 1	NM_001014033	NA	NA	NA	GE1107807	0.525868	0.0032
FTH1	FERRITIN, HEAVY POLYPEPTIDE 1	NM_012848	A_43_P13974	0.420896	0.00255428	GE20007	0.402395	0.005
CSTB	CYSTATIN B	NM_012838	A_42_P671171	0.256532	0.00119291	GE19999	0.301939	0.0119
CYP2D1	CYTOCHROME P450, FAMILY 2, SUBFAMILY D, POLYPEPTIDE 9	NM_153313	NA	NA	NA	GE1297897	0.931607	0.0018
G10	MATERNAL G10 TRANSCRIPT	NM_053936	A_42_P794928	0.595006	0.000490671	GE21312	NA	NA
SYT1	SYNAPTOTAGMIN 1	NM_001033680	NA	NA	NA	GE1271718	-0.62638	0.0047
RT1-A2	RT1 CLASS IB, LOCUS AW2	NM_012645	A_43_P11501	0.71659	0.000137807	GE1142034	NA	NA
GP1BB	GLYCOPROTEIN IB, BETA POLYPEPTIDE	NM_053930	A_43_P12985	-0.307041	0.00132774	GE13094	0.0908534	0.5636
ATP1B2	ATPASE, NA+/K+ TRANSPORTING, BETA 2 POLYPEPTIDE	NM_012507	A_43_P10996	0.319323	0.00136857	GE21654	0.416191	0.0291
UGP2	UDP-GLUCOSE PYROPHOSPHORYLASE 2	NM_001024743	A_42_P672480	0.209697	0.0016033	GE1260430	NA	NA
EFEMP1	EPIDERMAL GROWTH FACTOR-CONTAINING FIBULIN-LIKE EXTRACELLULAR MATRIX PROTEIN 1	NM_001012039	A_43_P10333	0.423301	0.00398233	GE1119911	NA	NA
PTHLH	PARATHYROID HORMONE-LIKE PEPTIDE	NM_012636	A_43_P15246	0.211927	0.00137241	GE19875	NA	NA
RGD1310725	HYPOTHETICAL LOC297077	NM_001039008	NA	NA	NA	GE17185	0.863621	0.0005
GPCR12	G-PROTEIN COUPLED RECEPTOR 12	NM_001037295	A_42_P736628	-0.290453	0.000424879	GE20858	NA	NA
MPDZ	MULTIPLE PDZ DOMAIN PROTEIN	NM_019196	A_43_P14529	-0.395173	0.000247946	GE1229765	-0.128945	0.6772
CACNA2D3	CALCIUM CHANNEL, VOLTAGE-DEPENDENT, ALPHA 2/DELTA 3 SUBUNIT	NM_175595	NA	NA	NA	GE18761	-0.504919	0.0012
RGD1310892	SIMILAR TO AXONEME CENTRAL APPARATUS PROTEIN	NM_001034960	NA	NA	NA	GE1305956	2.69089	0.0011
CFH	COMPLEMENT COMPONENT FACTOR H	NM_130409	A_42_P819656	0.382127	0.00392861	GE1159139	NA	NA
GRIK5	GLUTAMATE RECEPTOR, IONOTROPIC, KAINATE 5	NM_017262	A_43_P11887	-0.304648	0.000797534	GE1282323	NA	NA
RGD1309362	SIMILAR TO INTERFERON-INDUCIBLE GTPASE	NM_001024884	NA	NA	NA	GE12929	1.67197	1.3e-05
CCL4	SMALL INDUCIBLE CYTOKINE A4	NM_053858	NA	NA	NA	GE21895	1.79115	4.69e-05
PPP3CA	PROTEIN PHOSPHATASE 3, CATALYTIC SUBUNIT, ALPHA ISOFORM	NM_017041	A_42_P645092	-0.585464	8.28387e-06	GE1296551	-0.166503	0.2081
MAN2B1	MANNOSIDASE 2, ALPHA B1	NM_199404	NA	NA	NA	GE1114931	0.549718	0.0005
DBP	D SITE ALBUMIN PROMOTER BINDING PROTEIN	NM_012543	A_43_P11456	0.285816	0.000440551	GE19809	0.240864	0.103
KLK6	KALLIKREIN 6	NM_019175	A_43_P14904	0.501316	3.55535e-05	GE20566	NA	NA
RGD1303130	KIDNEY PREDOMINANT PROTEIN NCU-G1	NM_001004226	NA	NA	NA	GE18803	0.415651	0.0028
BRINP2	BMP/RETINOIC ACID-INDUCIBLE NEURAL-SPECIFIC PROTEIN 2	NM_173115	A_42_P828538	-0.279489	0.000916599	GE1165093	NA	NA
MRGPRF	MAS-RELATED GPR, MEMBER F	NM_153722	NA	NA	NA	GE18756	0.977683	0.0049
RGS3	REGULATOR OF G-PROTEIN SIGNALLING 3	NM_019340	A_43_P12028	0.587519	0.000129976	GE1179874	NA	NA
CLDN19	CLAUDIN 19	NM_001008514	NA	NA	NA	GE1263821	1.4878	0.0002
PTPRD	PROTEIN TYROSINE PHOSPHATASE, RECEPTOR TYPE, D	NM_019140	NA	NA	NA	GE1194593	1.45875	6.97e-05
ADAMTSL4	THROMBOSPONDIN REPEAT PROTEIN 1	NM_001034012	NA	NA	NA	GE15308	1.03844	2.56e-05
GSTA3	GLUTATHIONE S-TRANSFERASE A3	NM_031509	A_43_P12568	0.557504	0.000199955	GE1112235	NA	NA
CSRP2	CYSTEINE AND GLYCINE-RICH PROTEIN 2	NM_177425	A_43_P14891	0.236445	0.00409924	GE1237701	NA	NA
EMP2	EPITHELIAL MEMBRANE PROTEIN 2	NM_001007721	A_43_P13924	0.263823	0.00458637	GE17738	NA	NA
HRASLS3	HRAS LIKE SUPPRESSOR	NM_017060	NA	NA	NA	GE20310	0.597698	0.0004
RPL24	RIBOSOMAL PROTEIN L24	NM_022515	A_42_P791328	0.240551	0.000894504	GE1182308	NA	NA
LOC499806	SIMILAR TO RIKEN CDNA 4933404M02	NM_001024311	NA	NA	NA	GE1105693	0.625925	0.0016
ITIH3	INTER-ALPHA TRYPSIN INHIBITOR, HEAVY CHAIN 3	NM_017351	A_42_P464378	0.987976	3.12303e-06	GE1240672	NA	NA
RGD1309362	SIMILAR TO INTERFERON-INDUCIBLE GTPASE	NM_001024884	NA	NA	NA	GE1190631	1.51162	3.31e-05
GCSH	GLYCINE CLEAVAGE SYSTEM PROTEIN H (AMINOMETHYL CARRIER)	NM_133598	A_43_P13225	0.297749	0.00105828	GE1135034	NA	NA
CHI3L1	CHITINASE 3-LIKE 1	NM_053560	NA	NA	NA	GE1147453	0.970633	3.15e-06
RGD1308212	HYPOTHETICAL LOC287466	NM_001024234	A_42_P478451	0.40229	9.43796e-06	GE15198	NA	NA
RGS3	REGULATOR OF G-PROTEIN SIGNALLING 3	NM_019340	A_43_P12028	0.587519	0.000129976	GE15929	NA	NA
TMEM24	TRANSMEMBRANE PROTEIN 24	NM_001011996	A_43_P10694	-0.360049	4.74258e-05	GE1230920	-0.0384508	0.8239
RPS11	RIBOSOMAL PROTEIN S11	NM_031110	A_42_P471239	0.233411	0.00271647	GE19587	0.169925	0.0791
ITIH3	INTER-ALPHA TRYPSIN INHIBITOR, HEAVY CHAIN 3	NM_017351	A_42_P464378	0.987976	3.12303e-06	GE1102376	NA	NA
FCGR2B	FC RECEPTOR, IGG, LOW AFFINITY IIB	NM_175756	A_42_P735417	0.700914	0.00199326	GE22185	0.911883	0.0019
GPC4	SIMILAR TO GLYPICAN 4	NM_001014108	A_43_P18740	-0.488515	0.00126646	GE13839	-0.384772	0.0847
LAPTM5	LYSOSOMAL-ASSOCIATED PROTEIN TRANSMEMBRANE 5	NM_053538	A_43_P11236	0.463007	0.000147624	GE12766	0.70044	0.001
TCF4	TRANSCRIPTION FACTOR 4	NM_053369	A_43_P13828	-0.338693	0.00041039	GE1103641	NA	NA
F2R	COAGULATION FACTOR II (THROMBIN) RECEPTOR	NM_012950	A_43_P11629	0.273539	0.00223297	GE21841	NA	NA
RHOG	RAS HOMOLOG GENE FAMILY, MEMBER G	NM_001037195	NA	NA	NA	GE17940	0.679694	0.0002
TMEM10	TRANSMEMBRANE PROTEIN 10	NM_001017386	NA	NA	NA	GE1123660	1.30258	0.0047
TNFSF15	TUMOR NECROSIS FACTOR (LIGAND) SUPERFAMILY, MEMBER 15	NM_145765	NA	NA	NA	GE1248232	-0.983646	0.0004
RPL19	RIBOSOMAL PROTEIN L19	NM_031103	A_43_P14985	0.354295	9.2463e-05	GE1140362	0.220082	0.1139
MMP14	MATRIX METALLOPROTEINASE 14 (MEMBRANE-INSERTED)	NM_031056	A_42_P639027	0.278426	0.00457229	GE1182623	NA	NA
RT1-A2	RT1 CLASS IB, LOCUS AW2	NM_012645	A_43_P11501	0.71659	0.000137807	GE1270956	NA	NA
SLC13A5	SOLUTE CARRIER FAMILY 13 (SODIUM-DEPENDENT CITRATE TRANSPORTER), MEMBER 5	NM_170668	A_42_P508810	0.304743	0.00307388	GE1248418	NA	NA
CAMK2A	CALCIUM/CALMODULIN-DEPENDENT PROTEIN KINASE II ALPHA SUBUNIT	NM_012920	A_43_P11618	-0.313598	0.000552777	GE20058	NA	NA
PTGDS	PROSTAGLANDIN D2 SYNTHASE	NM_013015	A_43_P15529	1.0912	0.000884345	GE20119	1.85348	3.44e-05
GPC4	SIMILAR TO GLYPICAN 4	NM_001014108	A_43_P18740	-0.488515	0.00126646	GE1242550	-0.246909	0.2093
OLFM3	OLFACTOMEDIN 3	NM_145777	A_42_P675802	0.793214	0.00012068	GE1271766	NA	NA
CACNA2D3	CALCIUM CHANNEL, VOLTAGE-DEPENDENT, ALPHA 2/DELTA 3 SUBUNIT	NM_175595	NA	NA	NA	GE1157750	-0.421593	0.0028
CFH	COMPLEMENT COMPONENT FACTOR H	NM_130409	A_42_P819656	0.382127	0.00392861	GE1161723	0.584193	0.0008
ITGAL	INTEGRIN ALPHA L	NM_001033998	NA	NA	NA	GE1191810	1.29213	7.33e-05
SPARCL1	SPARC-LIKE 1 (MAST9, HEVIN)	NM_012946	A_42_P683634	0.447441	0.000385858	GE1207735	NA	NA
G10	MATERNAL G10 TRANSCRIPT	NM_053936	A_43_P12986	0.635168	0.000430079	GE21312	NA	NA
CXCL16	SIMILAR TO CHEMOKINE (C-X-C MOTIF) LIGAND 16	NM_001017478	A_43_P15660	0.144406	0.279797	GE14838	0.719315	0.0026
PPP3CA	PROTEIN PHOSPHATASE 3, CATALYTIC SUBUNIT, ALPHA ISOFORM	NM_017041	A_42_P645092	-0.585464	8.28387e-06	GE16482	-0.24366	0.0474
PLCB4	PHOSPHOLIPASE C, BETA 4	NM_024353	A_42_P537534	0.484608	0.00017717	GE1194274	NA	NA
NCR3	NATURAL CYTOTOXICITY TRIGGERING RECEPTOR 3	NM_181822	NA	NA	NA	GE1165622	1.05095	0.0026
RT1-A2	RT1 CLASS IB, LOCUS AW2	NM_012645	A_43_P11501	0.71659	0.000137807	GE1191706	NA	NA
LGI4	LEUCINE-RICH REPEAT LGI FAMILY, MEMBER 4	NM_199499	A_42_P824208	0.386366	0.00276495	GE1115878	NA	NA
MAG	MYELIN-ASSOCIATED GLYCOPROTEIN	NM_017190	A_42_P646991	0.779346	1.39848e-05	GE1126016	NA	NA
GPR64	G PROTEIN-COUPLED RECEPTOR 64	NM_181366	NA	NA	NA	GE1101396	0.529571	0.0013
RT1-A2	RT1 CLASS IB, LOCUS AW2	NM_012645	A_43_P11501	0.71659	0.000137807	GE1218241	NA	NA
ACSL1	ACYL-COA SYNTHETASE LONG-CHAIN FAMILY MEMBER 1	NM_012820	A_43_P14632	0.334345	0.000631144	GE1289301	NA	NA
ARG2	ARGINASE 2	NM_019168	A_43_P11960	0.285773	0.00472478	GE20564	NA	NA
CSND	CASEIN DELTA	NM_173106	NA	NA	NA	GE1258683	0.610322	0.0009
CD82	KANGAI 1	NM_031797	A_42_P739970	0.394855	0.00385109	GE1196459	NA	NA
HOD	HOMEOBOX ONLY DOMAIN	NM_133621	A_42_P658986	0.356456	0.00310647	GE13933	0.896698	1.09e-06
IDI1	ISOPENTENYL-DIPHOSPHATE DELTA ISOMERASE	NM_053539	A_43_P12843	-0.286237	0.00506213	GE13152	-0.307037	0.2029
PPP3CA	PROTEIN PHOSPHATASE 3, CATALYTIC SUBUNIT, ALPHA ISOFORM	NM_017041	A_42_P645092	-0.585464	8.28387e-06	GE21625	-0.150721	0.1846
PRDX2	PEROXIREDOXIN 2	NM_017169	A_42_P568992	0.212138	0.000337549	GE1265698	NA	NA
WSB1	WD REPEAT AND SOCS BOX-CONTAINING 1	NM_001025664	NA	NA	NA	GE1179373	0.488618	0.0014
ATP1B2	ATPASE, NA+/K+ TRANSPORTING, BETA 2 POLYPEPTIDE	NM_012507	A_43_P10996	0.319323	0.00136857	GE1110766	0.393855	0.0017
MALL	SIMILAR TO BENE PROTEIN	NM_001014182	NA	NA	NA	GE1257513	0.913952	0.0018
GLUD1	GLUTAMATE DEHYDROGENASE 1	NM_012570	A_43_P14157	0.42083	0.000236304	GE1165677	0.492417	0.0025
CPA2_PREDICTED	CARBOXYPEPTIDASE A2 (PANCREATIC) (PREDICTED)	NM_001013083	NA	NA	NA	GE1259081	0.470927	0.0016
RGD1310623	SIMILAR TO RIKEN CDNA 2010005O13	NM_001034011	NA	NA	NA	GE18157	1.16813	8.39e-06
MBP	MYELIN BASIC PROTEIN	NM_001025289	A_43_P11782	1.05772	1.41712e-05	GE1119541	NA	NA
CITED2	CBP/P300-INTERACTING TRANSACTIVATOR, WITH GLU/ASP-RICH CARBOXY-TERMINAL DOMAIN, 2	NM_053698	A_43_P12901	-0.21669	0.000524935	GE1246185	NA	NA
GATM	GLYCINE AMIDINOTRANSFERASE (L-ARGININE:GLYCINE AMIDINOTRANSFERASE)	NM_031031	A_42_P623688	0.320908	0.00211412	GE16563	NA	NA
CNP1	CYCLIC NUCLEOTIDE PHOSPHODIESTERASE 1	NM_012809	A_42_P803280	0.768577	6.35646e-06	GE19621	0.790772	3.49e-05
PCAF	P300/CBP-ASSOCIATED FACTOR	NM_001024252	A_43_P14623	0.416486	0.000344184	GE1302908	NA	NA
ATP6V0E1	ATPASE, H+ TRANSPORTING, V0 SUBUNIT E ISOFORM 1	NM_053578	A_42_P460281	0.303682	0.00255636	GE1169318	0.318461	0.0746
GSTM4	GLUTATHIONE S-TRANSFERASE M4	NM_020540	NA	NA	NA	GE1114249	0.466862	0.0026
TTC12	TETRATRICOPEPTIDE REPEAT DOMAIN 12	NM_001004246	NA	NA	NA	GE1142199	0.900413	0.0002
MYO7A	MYOSIN VIIA	NM_153473	NA	NA	NA	GE1283476	0.923339	0.0018
MMP16	MATRIX METALLOPROTEINASE 16	NM_080776	A_42_P552640	-0.334536	0.000191848	GE1151688	NA	NA
RGS3	REGULATOR OF G-PROTEIN SIGNALLING 3	NM_019340	A_43_P12028	0.587519	0.000129976	GE1127630	NA	NA
MAN1A_PREDICTED	MANNOSIDASE 1, ALPHA (PREDICTED)	NM_001033656	A_42_P724231	0.394781	0.00140675	GE1122326	NA	NA
C2	COMPLEMENT COMPONENT 2	NM_172222	A_42_P484186	0.334925	0.00507587	GE1113076	NA	NA
RT1-A2	RT1 CLASS IB, LOCUS AW2	NM_012645	A_43_P11501	0.71659	0.000137807	GE1217547	NA	NA
LCP1	LYMPHOCYTE CYTOSOLIC PROTEIN 1	NM_001012044	A_43_P11353	0.625374	0.000129618	GE1290293	NA	NA
NPC2	NIEMANN PICK TYPE C2	NM_173118	NA	NA	NA	GE14777	1.0513	9.66e-05
MYO1D	MYOSIN ID	NM_012983	A_42_P730229	0.880898	3.14057e-05	GE20098	NA	NA
ARF3	ADP-RIBOSYLATION FACTOR 3	NM_080904	A_43_P13098	-0.202441	0.00256096	GE1196441	NA	NA
CTSH	CATHEPSIN H	NM_012939	A_43_P11627	0.248635	0.00485438	GE20069	NA	NA
GABRD	GAMMA-AMINOBUTYRIC ACID A RECEPTOR, DELTA	NM_017289	A_43_P11897	-0.281422	0.000760905	GE20478	NA	NA
SP110	SP110 NUCLEAR BODY PROTEIN	NM_001034137	NA	NA	NA	GE15263	0.760349	0.0004
RT1-A2	RT1 CLASS IB, LOCUS AW2	NM_012645	A_43_P11501	0.71659	0.000137807	GE1164318	NA	NA
RPS27	RIBOSOMAL PROTEIN S27	NM_053597	NA	NA	NA	GE13438	0.287118	0.0026
SLC7A3	SOLUTE CARRIER FAMILY 7 (CATIONIC AMINO ACID TRANSPORTER, Y+ SYSTEM), MEMBER 3	NM_017217	A_42_P700209	0.534667	0.00482976	GE21228	NA	NA
HAPLN2	HYALURONAN AND PROTEOGLYCAN LINK PROTEIN 2	NM_022285	A_43_P15779	0.724959	2.80356e-05	GE13140	NA	NA
BST2	BONE MARROW STROMAL CELL ANTIGEN 2	NM_198134	A_42_P696233	0.437738	0.00391777	GE1185939	NA	NA
RGD1303232	PHYTN_DEHYDRO AND PYR_REDOX DOMAIN CONTAINING PROTEIN RGD1303232	NM_001004261	A_42_P830729	0.305854	0.00214865	GE1100320	NA	NA
ARG1	ARGINASE 1	NM_017134	A_42_P758222	-0.669727	6.89241e-05	GE20364	NA	NA
LCP1	LYMPHOCYTE CYTOSOLIC PROTEIN 1	NM_001012044	A_43_P11353	0.625374	0.000129618	GE17594	0.771463	0.0217
RPS15A	RIBOSOMAL PROTEIN S15A	NM_053982	A_43_P13007	0.232235	0.00534045	GE1271709	NA	NA
LOC360910	SIMILAR TO ATP-BINDING CASSETTE TRANSPORTER ABCG3	NM_001014133	NA	NA	NA	GE1263064	0.759071	0.0003
PCSK4	PROPROTEIN CONVERTASE SUBTILISIN/KEXIN TYPE 4	NM_133559	A_42_P506956	-0.15942	0.124867	GE1150641	-0.495532	0.0037
ABI2	ABL-INTERACTOR 2	NM_173143	A_42_P606890	-0.204426	0.00138409	GE1290899	NA	NA
RPL24	RIBOSOMAL PROTEIN L24	NM_022515	A_43_P13936	0.256554	0.000696607	GE1182308	NA	NA
CD81	CD 81 ANTIGEN	NM_013087	A_43_P11704	0.407421	0.000460214	GE1297518	0.552279	7.65e-06
RGD1305061	SIMILAR TO RIKEN CDNA 2700055K07	NM_001009639	A_43_P11040	0.659284	6.74734e-05	GE17225	0.563256	0.0122
TCF4	TRANSCRIPTION FACTOR 4	NM_053369	A_43_P13828	-0.338693	0.00041039	GE20851	NA	NA
NCF1	NEUTROPHIL CYTOSOLIC FACTOR 1	NM_053734	A_43_P12916	0.0510614	0.396443	GE1145076	1.22002	0.0004
TIMP2	TISSUE INHIBITOR OF METALLOPROTEINASE 2	NM_021989	A_43_P12142	0.610635	1.54062e-05	GE1197405	NA	NA
ITPKA	INOSITOL 1,4,5-TRISPHOSPHATE 3-KINASE A	NM_031045	A_43_P12489	-0.370512	0.00114337	GE19685	NA	NA
DLX5	DISTAL-LESS HOMEOBOX 5	NM_012943	A_43_P14887	0.35691	0.00388447	GE1169730	NA	NA
CBLN2	CEREBELLIN 2 PRECURSOR PROTEIN	NM_001012740	A_42_P542985	0.774805	0.00278258	GE1220319	NA	NA
ID3	INHIBITOR OF DNA BINDING 3	NM_013058	NA	NA	NA	GE21288	1.05644	5.41e-07
CH25H	CHOLESTEROL 25-HYDROXYLASE	NM_001025415	NA	NA	NA	GE1174522	0.953824	3.3e-06
PRKAR1A	PROTEIN KINASE, CAMP DEPENDENT REGULATORY, TYPE I, ALPHA	NM_013181	A_42_P722564	0.23564	0.000835603	GE1170510	NA	NA
LRRC23	LEUCINE RICH PROTEIN, B7 GENE	NM_001013165	NA	NA	NA	GE1178232	0.51924	0.0035
C1QA	COMPLEMENT COMPONENT 1, Q SUBCOMPONENT, ALPHA POLYPEPTIDE	NM_001008515	NA	NA	NA	GE19453	0.615981	0.0009
SNAPC2	SMALL NUCLEAR RNA ACTIVATING COMPLEX, POLYPEPTIDE 2	NM_001013121	NA	NA	NA	GE14496	0.561204	0.0014
MAP2K1	MITOGEN ACTIVATED PROTEIN KINASE KINASE 1	NM_031643	A_42_P638191	-0.31804	0.000864335	GE1192993	NA	NA
RT1-A2	RT1 CLASS IB, LOCUS AW2	NM_012645	A_43_P11501	0.71659	0.000137807	GE1134891	NA	NA
SDFR1	STROMAL CELL DERIVED FACTOR RECEPTOR 1	NM_019380	A_43_P12047	-0.277025	0.00208553	GE22222	NA	NA
LDHD	LACTATE DEHYDROGENASE D	NM_001008893	A_43_P18171	0.104566	0.0592083	GE15599	0.656634	0.0008
NR4A3	NEURON-DERIVED ORPHAN RECEPTOR	NM_017352	A_43_P12619	-0.31341	0.00555234	GE1302764	NA	NA
APOE	APOLIPOPROTEIN E	NM_138828	A_43_P13298	0.45918	0.00255985	GE21632	NA	NA
RPL31	RIBOSOMAL PROTEIN L31	NM_022506	A_43_P12229	0.257549	7.24863e-05	GE1123509	NA	NA
ECHS1	ENOYL COENZYME A HYDRATASE, SHORT CHAIN, 1, MITOCHONDRIAL	NM_078623	A_43_P13066	0.298482	0.000275255	GE21094	0.152119	0.2559
RT1-A2	RT1 CLASS IB, LOCUS AW2	NM_012645	A_43_P11501	0.71659	0.000137807	GE1269235	NA	NA
RPS17	RIBOSOMAL PROTEIN S17	NM_017152	A_42_P631128	0.288331	0.000297533	GE20378	0.277152	0.0214
DBP	D SITE ALBUMIN PROMOTER BINDING PROTEIN	NM_012543	A_43_P11456	0.285816	0.000440551	GE1241210	0.256044	0.2062
AXL	AXL RECEPTOR TYROSINE KINASE (PREDICTED)	NM_001013147	A_43_P18268	0.329446	0.00010619	GE21354	NA	NA
ZFP451	ZINC FINGER PROTEIN 451	NM_001033705	A_43_P10498	-0.397067	0.00132788	GE1293604	NA	NA
MAP2K1	MITOGEN ACTIVATED PROTEIN KINASE KINASE 1	NM_031643	A_42_P638191	-0.31804	0.000864335	GE1132798	NA	NA
CA3	CARBONIC ANHYDRASE 3	NM_019292	NA	NA	NA	GE20641	1.40229	1.54e-05
PPP3CA	PROTEIN PHOSPHATASE 3, CATALYTIC SUBUNIT, ALPHA ISOFORM	NM_017041	A_42_P645092	-0.585464	8.28387e-06	GE1303378	NA	NA
FGL2	FIBRINOGEN-LIKE 2	NM_053455	NA	NA	NA	GE12928	0.945533	3.15e-05
ARTS1	TYPE 1 TUMOR NECROSIS FACTOR RECEPTOR SHEDDING AMINOPEPTIDASE REGULATOR	NM_030836	A_43_P15303	0.24412	0.0042254	GE13386	0.255078	0.1609
LGMN	LEGUMAIN	NM_022226	A_43_P12172	0.467525	0.000474486	GE1152996	NA	NA
GPC4	SIMILAR TO GLYPICAN 4	NM_001014108	A_43_P18740	-0.488515	0.00126646	GE1286745	NA	NA
TNFRSF1A	TUMOR NECROSIS FACTOR RECEPTOR SUPERFAMILY, MEMBER 1A	NM_013091	A_43_P15259	0.341522	0.00171948	GE20168	NA	NA
NINJ2	NINJURIN 2	NM_021595	A_42_P503688	0.369781	0.000156175	GE20752	NA	NA
UGP2	UDP-GLUCOSE PYROPHOSPHORYLASE 2	NM_001024743	A_42_P672480	0.209697	0.0016033	GE1119344	NA	NA
CDKN1C	CYCLIN-DEPENDENT KINASE INHIBITOR 1C (P57)	NM_001033757	NA	NA	NA	GE13772	0.953079	5.08e-05
SAA4	HERMANSKY-PUDLAK SYNDROME 5	NM_001009478	A_43_P10051	0.202299	0.00330077	GE1103615	NA	NA
IGFBP5	INSULIN-LIKE GROWTH FACTOR BINDING PROTEIN 5	NM_012817	NA	NA	NA	GE21444	0.937043	0.0009
RPS29	RIBOSOMAL PROTEIN S29	NM_012876	A_43_P11598	0.290373	0.000513365	GE22145	NA	NA
CNP1	CYCLIC NUCLEOTIDE PHOSPHODIESTERASE 1	NM_012809	A_42_P803280	0.768577	6.35646e-06	GE19621	0.790772	3.49e-05
COL23A1	PROCOLLAGEN, TYPE XXIII, ALPHA 1	NM_181636	NA	NA	NA	GE1243380	0.907814	0.0004
RT1-A2	RT1 CLASS IB, LOCUS AW2	NM_012645	A_43_P11501	0.71659	0.000137807	GE1159022	NA	NA
LOC312863	SIMILAR TO RIKEN CDNA 1810060J02	NM_001014061	A_43_P18038	0.404083	0.000824306	GE1291570	0.116099	0.4331
ATP1B2	ATPASE, NA+/K+ TRANSPORTING, BETA 2 POLYPEPTIDE	NM_012507	A_43_P10996	0.319323	0.00136857	GE1206039	NA	NA
CPG2	CPG2 PROTEIN	NM_001029909	A_42_P807826	-0.736439	0.000534461	GE1145539	NA	NA
FKBP1A	FK506 BINDING PROTEIN 1A	NM_013102	A_43_P11287	-0.240559	0.00183154	GE20176	-0.165855	0.2634
SLC12A2	SOLUTE CARRIER FAMILY 12, MEMBER 2	NM_031798	A_42_P742882	0.498934	9.59276e-05	GE1179792	NA	NA
GATM	GLYCINE AMIDINOTRANSFERASE (L-ARGININE:GLYCINE AMIDINOTRANSFERASE)	NM_031031	A_42_P623688	0.320908	0.00211412	GE1116919	NA	NA
ABI3	ABI GENE FAMILY, MEMBER 3	NM_001013118	A_42_P562315	0.274159	0.00334816	GE1302986	NA	NA
C1QB	COMPLEMENT COMPONENT 1, Q SUBCOMPONENT, BETA POLYPEPTIDE	NM_019262	A_42_P781919	0.497242	0.000263394	GE20621	0.697952	8.98e-05
GNA15	GUANINE NUCLEOTIDE BINDING PROTEIN, ALPHA 15	NM_053542	A_42_P485309	0.307579	0.00128402	GE1302592	NA	NA
IGSF1	IMMUNOGLOBULIN SUPERFAMILY, MEMBER 1	NM_175763	A_42_P784294	1.40701	4.67598e-06	GE15772	NA	NA
DGAT2	DIACYLGLYCEROL O-ACYLTRANSFERASE HOMOLOG 2 (MOUSE)	NM_001012345	A_42_P733209	-0.343593	0.00216286	GE16893	NA	NA
SNF1LK	SNF1-LIKE KINASE	NM_021693	A_42_P816576	0.255816	0.00451469	GE20777	NA	NA
LOC311548	SIMILAR TO RIKEN CDNA 4930509O20	NM_001014051	NA	NA	NA	GE1299491	0.904426	0.0005
CYP26B1	CYTOCHROME P450, FAMILY 26, SUBFAMILY B, POLYPEPTIDE 1	NM_181087	A_42_P693964	0.769581	0.00359327	GE1103915	NA	NA
RT1-A2	RT1 CLASS IB, LOCUS AW2	NM_012645	A_43_P11501	0.71659	0.000137807	GE12637	NA	NA
RPL41	RIBOSOMAL PROTEIN L41	NM_139083	A_43_P13356	0.264815	0.00297368	GE1181482	NA	NA
RGD1306195	SIMILAR TO RAN PROTEIN	NM_001014062	A_42_P603524	-0.622479	6.23118e-05	GE1173198	NA	NA
LOC499749	SIMILAR TO RIKEN CDNA C430004E15	NM_001024309	A_42_P577600	0.48494	0.000244436	GE1152612	NA	NA
CATNA1	CATENIN (CADHERIN-ASSOCIATED PROTEIN), ALPHA 1, 102KDA	NM_001007145	A_42_P669549	0.519825	1.6135e-05	GE1168701	NA	NA
SDFR1	STROMAL CELL DERIVED FACTOR RECEPTOR 1	NM_019380	A_43_P12047	-0.277025	0.00208553	GE1131259	NA	NA
NDRG2	N-MYC DOWNSTREAM REGULATED GENE 2	NM_133583	A_42_P547616	0.385551	0.00271603	GE1269371	0.314523	0.018
KITL	KIT LIGAND	NM_021843	A_42_P624522	-0.413524	4.8578e-05	GE1246772	NA	NA
PCP4	PURKINJE CELL PROTEIN 4	NM_013002	A_42_P818792	-0.34117	0.00418789	GE1126416	NA	NA
SPARC	SECRETED ACIDIC CYSTEINE RICH GLYCOPROTEIN	NM_012656	A_42_P669371	0.493233	0.000927466	GE22049	NA	NA
GPM6B	GLYCOPROTEIN M6B	NM_138846	A_43_P13307	0.425197	0.000516939	GE1170021	NA	NA
LCP1	LYMPHOCYTE CYTOSOLIC PROTEIN 1	NM_001012044	A_43_P11353	0.625374	0.000129618	GE1228066	1.0536	0.0006
AKAP5	A KINASE (PRKA) ANCHOR PROTEIN 5	NM_133515	A_42_P507291	-0.275429	0.00557999	GE21002	NA	NA
KLK6	KALLIKREIN 6	NM_019175	A_42_P738431	0.72439	7.3792e-06	GE20566	NA	NA
HSPB1	HEAT SHOCK 27KDA PROTEIN 1	NM_031970	NA	NA	NA	GE1108671	1.09687	0.0013
CALD1	CALDESMON 1	NM_013146	NA	NA	NA	GE13771	0.525668	0.0006
PPP3CA	PROTEIN PHOSPHATASE 3, CATALYTIC SUBUNIT, ALPHA ISOFORM	NM_017041	A_42_P645092	-0.585464	8.28387e-06	GE16096	-0.146563	0.324
RPS13	RIBOSOMAL PROTEIN S13	NM_130432	A_42_P793008	0.24529	0.00579179	GE1168001	NA	NA
GLUD1	GLUTAMATE DEHYDROGENASE 1	NM_012570	A_42_P660048	0.407842	0.000194885	GE1150205	NA	NA
TPT1	TUMOR PROTEIN, TRANSLATIONALLY-CONTROLLED 1	NM_053867	A_42_P514585	0.326949	0.00284227	GE20884	0.203765	0.0312
UBE2L6	UBIQUITIN-CONJUGATING ENZYME E2L 6	NM_001024755	NA	NA	NA	GE14573	0.687509	0.0014
TUBA8	SIMILAR TO TUBULIN ALPHA-8 CHAIN (ALPHA-TUBULIN 8)	NM_001024339	A_42_P656703	-0.339447	0.000614009	GE1103252	NA	NA
TCIRG1	T-CELL, IMMUNE REGULATOR 1	NM_199089	NA	NA	NA	GE1137248	0.640713	0.0013
VPS24	VACUOLAR PROTEIN SORTING 24 (YEAST)	NM_172331	NA	NA	NA	GE1184112	0.524666	0.0016
KITL	KIT LIGAND	NM_021843	A_42_P534961	-0.540267	0.000310983	GE1246772	NA	NA
ATP2B1	ATPASE, CA++ TRANSPORTING, PLASMA MEMBRANE 1	NM_053311	A_43_P12761	-0.383491	0.000470684	GE1201571	NA	NA
FKBP1A	FK506 BINDING PROTEIN 1A	NM_013102	A_43_P11287	-0.240559	0.00183154	GE17999	-0.113411	0.4173
RXRA	RETINOID X RECEPTOR ALPHA	NM_012805	A_42_P717482	0.374897	0.000192605	GE21675	NA	NA
LASS2	LONGEVITY ASSURANCE HOMOLOG 2 (S. CEREVISIAE)	NM_001033700	NA	NA	NA	GE1276726	0.549324	0.0016
PLD1	PHOSPHOLIPASE D1	NM_030992	A_42_P567164	0.274426	0.000325328	GE22033	NA	NA
CNN3	CALPONIN 3, ACIDIC	NM_019359	A_42_P761125	0.54011	6.31823e-05	GE20682	NA	NA
GLIPR1	GLI PATHOGENESIS-RELATED 1 (GLIOMA)	NM_001011987	A_42_P607092	0.272109	0.00504332	GE1138530	NA	NA
CASP4	CASPASE 11	NM_053736	A_43_P12917	0.0746775	0.381156	GE16721	0.831067	2.39e-05
RPN2	RIBOPHORIN II	NM_031698	A_42_P755806	0.214369	0.00281236	GE1172741	0.067914	0.7555
FGL2	FIBRINOGEN-LIKE 2	NM_053455	NA	NA	NA	GE13588	0.789854	0.0003
CDW92	CDW92 ANTIGEN	NM_001033852	A_42_P657606	0.714763	3.65984e-06	GE1215179	NA	NA
ATP1B2	ATPASE, NA+/K+ TRANSPORTING, BETA 2 POLYPEPTIDE	NM_012507	A_43_P10996	0.319323	0.00136857	GE1110766	0.393855	0.0017
UNC13C	UNC-13 HOMOLOG C (C. ELEGANS)	NM_173146	NA	NA	NA	GE21026	-0.882039	0.0011
BIN2	BRIDGING INTEGRATOR 2	NM_001012223	A_42_P778347	0.289416	0.00295379	GE1224452	NA	NA
PAICS	PHOSPHORIBOSYLAMINOIMIDAZOLE CARBOXYLASE, PHOSPHORIBOSYLAMINORIBOSYLAMINOIMIDAZOLE SUCCINOCARBOXAMIDE SYNTHETASE	NM_080910	A_43_P23189	0.251313	0.00147485	GE19491	NA	NA
C1QB	COMPLEMENT COMPONENT 1, Q SUBCOMPONENT, BETA POLYPEPTIDE	NM_019262	A_42_P781919	0.497242	0.000263394	GE20621	0.697952	8.98e-05
CAPG	CAPPING PROTEIN (ACTIN FILAMENT), GELSOLIN-LIKE	NM_001013086	NA	NA	NA	GE17580	1.52411	4.82e-08
LAPTM5	LYSOSOMAL-ASSOCIATED PROTEIN TRANSMEMBRANE 5	NM_053538	A_43_P11236	0.463007	0.000147624	GE13135	0.67229	0.0033
LOC311548	SIMILAR TO RIKEN CDNA 4930509O20	NM_001014051	NA	NA	NA	GE18753	0.947479	0.0004
MYO1D	MYOSIN ID	NM_012983	A_42_P730229	0.880898	3.14057e-05	GE1246654	1.14757	0.0002
GABRB1	GAMMA-AMINOBUTYRIC ACID RECEPTOR, SUBUNIT BETA 1	NM_012956	A_43_P11632	-0.242093	0.00435707	GE20081	0.042084	0.7237
ATP1B3	ATPASE, NA+/K+ TRANSPORTING, BETA 3 POLYPEPTIDE	NM_012913	A_42_P555125	0.368155	0.000286884	GE1280164	NA	NA
TAC1	TACHYKININ 1	NM_012666	A_43_P15247	0.610215	0.00169216	GE19888	NA	NA
EHD4	EH-DOMAIN CONTAINING 4	NM_139324	A_42_P809565	0.2386	0.00417689	GE12483	NA	NA
PPP3CA	PROTEIN PHOSPHATASE 3, CATALYTIC SUBUNIT, ALPHA ISOFORM	NM_017041	A_43_P11790	-0.416264	0.000824001	GE1198331	NA	NA
SCAP2	SRC FAMILY ASSOCIATED PHOSPHOPROTEIN 2	NM_130413	A_43_P13111	0.467516	6.86567e-05	GE1231617	NA	NA
SLC12A2	SOLUTE CARRIER FAMILY 12, MEMBER 2	NM_031798	A_42_P742882	0.498934	9.59276e-05	GE1295817	NA	NA
IGFBP7	INSULIN-LIKE GROWTH FACTOR BINDING PROTEIN 7	NM_001013048	NA	NA	NA	GE1147288	0.45586	0.001
RASSF2	RAS ASSOCIATION (RALGDS/AF-6) DOMAIN FAMILY 2	NM_001037096	NA	NA	NA	GE1280990	0.635615	0.0004
ITM2B	INTEGRAL MEMBRANE PROTEIN 2B	NM_001006963	A_42_P688583	0.236898	0.00345544	GE1184222	0.0874628	0.3642
PPP3CA	PROTEIN PHOSPHATASE 3, CATALYTIC SUBUNIT, ALPHA ISOFORM	NM_017041	A_42_P777177	-0.569726	1.7521e-06	GE1198331	NA	NA
CD81	CD 81 ANTIGEN	NM_013087	A_43_P11704	0.407421	0.000460214	GE1297518	0.552279	7.65e-06
OLFM1	OLFACTOMEDIN 1	NM_053573	A_43_P12855	-0.823916	0.000156965	GE1114588	NA	NA
PGRMC1	PROGESTERONE RECEPTOR MEMBRANE COMPONENT 1	NM_021766	A_42_P674786	0.274233	0.000357006	GE1285080	NA	NA
PPP3CA	PROTEIN PHOSPHATASE 3, CATALYTIC SUBUNIT, ALPHA ISOFORM	NM_017041	A_42_P777177	-0.569726	1.7521e-06	GE1303378	NA	NA
RPL28	RIBOSOMAL PROTEIN L28	NM_022697	A_43_P12302	0.244943	0.00225421	GE1214863	NA	NA
ADAMTS1	A DISINTEGRIN-LIKE AND METALLOPROTEASE (REPROLYSIN TYPE) WITH THROMBOSPONDIN TYPE 1 MOTIF, 1	NM_024400	A_42_P535644	0.421054	9.30616e-05	GE13387	NA	NA
MDK	MIDKINE	NM_030859	A_43_P15307	0.175996	0.0329845	GE13583	0.428678	0.0032
AIF1	ALLOGRAFT INFLAMMATORY FACTOR 1	NM_017196	NA	NA	NA	GE21912	0.603976	0.0005
