# Supplementary material for: A Systems Level, Functional Genomics Analysis of Chronic Epilepsy
Source: PLoS One. 2011 Jun 14;6(6):e20763. doi: 10.1371/journal.pone.0020763 (PMC3114768; doi:10.1371/journal.pone.0020763)
Supplement: Table S6 — Differentially expressed genes due to seizures in the non-lesioned hippocampus. This table summarizes the genes that are differentially expressed between lesioned hippocampi in animals with and without seizures. The gene symbols, gene names, and Refseq identifiers are shown in the first column. The probe on the Agilent platform and the fold change and differential expression p-value for that probe is shown in the fourth, fifth, and sixth columns. The probe on the Codelink platform and the fold change and differential expression p-value for that probe is shown in the seventh, eighth, and ninth columns. (XLS) [file pone.0020763.s008.xls]

## Sheet: Sheet1
Symbol	Gene Name	RefSeq	Agilent	Agi_fc	Agi_pv	Codelink	Cod_fc	Cod_pv
GPR88	G-PROTEIN COUPLED RECEPTOR 88	NM_031696	A_42_P709638	-0.236035	0.54682	GE13127	-1.02885	0.0018
TF	TRANSFERRIN	NM_001013110	A_43_P11796	0.0822342	0.896204	GE1227220	-0.388544	0.0009
QDPR	QUINOID DIHYDROPTERIDINE REDUCTASE	NM_022390	A_43_P12219	0.00453729	0.991779	GE1114043	-0.38496	0.0004
TAC2	TACHYKININ 2	NM_019162	A_42_P503288	1.77762	0.00441405	GE20559	1.09437	0.0846
DDC	DOPA DECARBOXYLASE	NM_012545	A_42_P682435	0.578021	0.00591564	GE19810	0.677621	0.004
GAL	GALANIN	NM_033237	A_42_P614175	1.01344	0.0447515	GE19571	2.425	0.0011
GAS6	GROWTH ARREST SPECIFIC 6	NM_057100	A_43_P13025	0.547311	0.00058759	GE1300029	0.0511633	0.6118
DDC	DOPA DECARBOXYLASE	NM_012545	A_43_P14910	0.777465	0.000938504	GE19810	0.677621	0.004
RGD1306991	SIMILAR TO PROTEIN C20ORF103 PRECURSOR	NM_001014183	A_43_P15047	-0.35686	0.461405	GE1111232	-0.7413	2.71e-06
CATNA1	CATENIN (CADHERIN-ASSOCIATED PROTEIN), ALPHA 1, 102KDA	NM_001007145	A_43_P19010	0.662919	0.000149971	GE12339	0.315914	0.0845
RGD1359691	HYPOTHETICAL LOC287534	NM_001007611	A_42_P667000	1.18027	0.00478723	GE1217498	1.19893	7.37e-07
CART	COCAINE AND AMPHETAMINE REGULATED TRANSCRIPT	NM_017110	A_42_P636627	0.929118	0.00140531	GE20347	1.02517	1.28e-06
CART	COCAINE AND AMPHETAMINE REGULATED TRANSCRIPT	NM_017110	A_42_P636627	0.929118	0.00140531	GE20347	1.02517	1.28e-06
PPP1R1A	PROTEIN PHOSPHATASE 1, REGULATORY (INHIBITOR) SUBUNIT 1A	NM_022676	A_43_P12287	0.946064	0.0100734	GE1282787	0.487795	0.001
TYROBP	TYRO PROTEIN TYROSINE KINASE BINDING PROTEIN	NM_212525	A_42_P807697	-0.142373	0.617	GE13920	-0.363085	0.0011
CCNG1	CYCLIN G1	NM_012923	A_43_P11620	0.693464	0.00794833	GE22179	0.328951	0.0019
CTSB	CATHEPSIN B	NM_022597	A_43_P15292	0.328158	0.226707	GE1184511	-0.22516	0.0012
IFNGR1	INTERFERON GAMMA RECEPTOR 1	NM_053783	A_42_P658552	0.669933	0.00194048	GE21481	-0.0142081	0.8838
RGD1306991	SIMILAR TO PROTEIN C20ORF103 PRECURSOR	NM_001014183	A_43_P23179	0.280608	0.18121	GE1111232	-0.7413	2.71e-06
TYRO3	TYRO3 PROTEIN TYROSINE KINASE 3	NM_017092	A_43_P15227	-0.216924	0.439346	GE1152599	-0.41889	0.0006
PTDSS1	PHOSPHATIDYLSERINE SYNTHASE 1	NM_001012113	A_43_P18150	0.627034	1.2308e-05	GE12525	0.0339339	0.7395
TYRO3	TYRO3 PROTEIN TYROSINE KINASE 3	NM_017092	A_42_P674860	-0.269916	0.27667	GE1152599	-0.41889	0.0006
SMPD1	SPHINGOMYELIN PHOSPHODIESTERASE 1, ACID LYSOSOMAL	NM_001006997	A_42_P781500	0.560994	0.00343089	GE16704	0.207393	0.1358
TUBB6	SIMILAR TO RIKEN CDNA 2310057H16	NM_001025675	A_42_P768467	0.458706	0.155927	GE1106781	0.831472	0.0003
RAB11A	RAB11A, MEMBER RAS ONCOGENE FAMILY	NM_031152	A_43_P12544	0.613716	0.00655979	GE1196985	0.543892	0.0083
LYZ	LYSOZYME	NM_012771	A_43_P10020	0.804992	0.00102148	GE19957	0.436482	0.0153
CDH13	CADHERIN 13	NM_138889	A_42_P749820	-0.302122	0.182921	GE1223994	-0.492079	0.0007
FKBP5	FK506 BINDING PROTEIN 5	NM_001012174	A_43_P20254	0.377567	0.00543913	GE19218	0.200253	0.2778
CHGB	CHROMOGRANIN B	NM_012526	A_42_P485961	0.679888	0.00507068	GE19801	0.046002	0.6806
ALDH3A2	ALDEHYDE DEHYDROGENASE FAMILY 3, SUBFAMILY A2	NM_031731	A_42_P484593	0.594537	0.00502613	GE19734	-0.0700575	0.4645
PSAT1	PHOSPHOSERINE AMINOTRANSFERASE 1	NM_198738	A_43_P16569	0.826658	0.000777211	GE14709	-0.212902	0.0347
NA	NA	NM_001079936	A_42_P795009	0.853896	4.89948e-05	GE1202904	0.206018	0.0617
ACSL1	ACYL-COA SYNTHETASE LONG-CHAIN FAMILY MEMBER 1	NM_012820	A_43_P14632	0.826792	0.000725513	GE1161545	-0.00563751	0.9621
PFKFB2	6-PHOSPHOFRUCTO-2-KINASE/FRUCTOSE-2,6-BIPHOSPHATASE 2	NM_001033964	A_42_P711274	-0.905805	0.000285659	GE1147049	-0.589008	0.0002
PFKFB2	6-PHOSPHOFRUCTO-2-KINASE/FRUCTOSE-2,6-BIPHOSPHATASE 2	NM_001033964	A_42_P711274	-0.905805	0.000285659	GE1147049	-0.589008	0.0002
AZI2	5-AZACYTIDINE INDUCED GENE 2	NM_001025705	A_43_P14849	0.827916	0.00153462	GE1146173	0.118227	0.3076
KPNA4	KARYOPHERIN (IMPORTIN) ALPHA 4	NM_001014793	A_43_P20282	0.402201	0.000232031	GE1118472	0.827006	0.001
KPNA4	KARYOPHERIN (IMPORTIN) ALPHA 4	NM_001014793	A_43_P20282	0.402201	0.000232031	GE1118472	0.827006	0.001
NR4A3	NEURON-DERIVED ORPHAN RECEPTOR	NM_017352	A_43_P12619	-0.234414	0.385996	GE1181675	-0.442222	0.0012
LOC502894	HYPOTHETICAL PROTEIN LOC502894	NM_001025064	A_42_P675139	0.903243	0.00578748	GE17670	0.208767	0.045
UBE2B	UBIQUITIN-CONJUGATING ENZYME E2B, RAD6 HOMOLOG (S. CEREVISIAE)	NM_031138	A_43_P12537	-0.243639	0.060717	GE1244270	-0.73865	0.0013
NID67	PUTATIVE SMALL MEMBRANE PROTEIN NID67	NM_173126	A_43_P13423	0.484378	0.00360749	GE13577	0.283803	0.0625
CDC2A	CELL DIVISION CYCLE 2 HOMOLOG A (S. POMBE)	NM_019296	A_42_P580844	0.317679	0.0506312	GE20644	0.815657	0.0017
TPP1	CEROID-LIPOFUSCINOSIS, NEURONAL 2	NM_031357	A_43_P12565	0.23772	0.0998484	GE14203	-0.320486	0.002
WDR1	SIMILAR TO WDR1 PROTEIN	NM_001014135	A_43_P22174	0.48998	0.000401786	GE14697	0.0915306	0.3186
KCNH1	POTASSIUM VOLTAGE-GATED CHANNEL, SUBFAMILY H (EAG-RELATED), MEMBER 1	NM_031742	A_43_P12658	1.01968	0.000468876	GE1179146	0.223793	0.1518
ADCY5	ADENYLATE CYCLASE 5	NM_022600	A_43_P12256	-0.61304	0.0010031	GE15967	0.0209111	0.9094
STAT1	SIGNAL TRANSDUCER AND ACTIVATOR OF TRANSCRIPTION 1	NM_001034164	A_43_P12727	0.562091	0.00326803	GE13464	0.228849	0.1659
CDC2A	CELL DIVISION CYCLE 2 HOMOLOG A (S. POMBE)	NM_019296	A_42_P580844	0.317679	0.0506312	GE22149	1.58145	0.0001
ZBED3	ZINC FINGER, BED DOMAIN CONTAINING 3	NM_001025729	A_42_P744291	0.481074	0.00383847	GE17642	0.437441	0.0059
SRP54	SIGNAL RECOGNITION PARTICLE 54	NM_053871	A_42_P528002	0.480689	0.00130798	GE1113325	0.231064	0.1949
CATNA1	CATENIN (CADHERIN-ASSOCIATED PROTEIN), ALPHA 1, 102KDA	NM_001007145	A_43_P19010	0.662919	0.000149971	GE1249788	-0.0581425	0.5481
MAP2K2	MITOGEN ACTIVATED PROTEIN KINASE KINASE 2	NM_133283	A_42_P653827	-0.473392	0.00456401	GE19616	0.101381	0.4438
PSMA2	PROTEASOME (PROSOME, MACROPAIN) SUBUNIT, ALPHA TYPE 2	NM_017279	A_42_P565161	0.0435277	0.774743	GE20469	0.477366	0.0012
AZI2	5-AZACYTIDINE INDUCED GENE 2	NM_001025705	A_42_P524676	0.444163	0.000138363	GE1146173	0.118227	0.3076
CSDA	COLD SHOCK DOMAIN PROTEIN A	NM_031979	A_42_P631493	0.713279	0.0041833	GE21940	0.14965	0.2917
CNTN3	CONTACTIN 3	NM_019329	A_43_P12024	0.411916	0.00049261	GE20663	0.136585	0.5172
VDR	VITAMIN D RECEPTOR	NM_017058	A_43_P11799	-1.01164	0.000223654	GE21651	0.246347	0.2802
RPO1-1	RNA POLYMERASE 1-1	NM_001008330	A_43_P15195	0.605675	0.00552905	GE12368	0.235727	0.1091
PMP22	PERIPHERAL MYELIN PROTEIN 22	NM_017037	A_42_P459428	0.673175	0.00587747	GE20294	0.123799	0.2658
NTRK2	NEUROTROPHIC TYROSINE KINASE, RECEPTOR, TYPE 2	NM_012731	A_43_P10774	0.494116	0.00249056	GE19928	-0.0399332	0.7687
GUCY1B3	GUANYLATE CYCLASE 1, SOLUBLE, BETA 3	NM_012769	A_42_P769033	0.481313	0.00549179	GE1128640	0.170053	0.1297
FKBP5	FK506 BINDING PROTEIN 5	NM_001012174	A_43_P20254	0.377567	0.00543913	GE1229133	-0.0142081	0.9184
FOS	FBJ MURINE OSTEOSARCOMA VIRAL ONCOGENE HOMOLOG	NM_022197	A_42_P552092	0.0607665	0.808482	GE18981	-1.0807	0.001
TCF4	TRANSCRIPTION FACTOR 4	NM_053369	A_43_P10045	-0.146849	0.357348	GE1280593	-0.487824	0.0016
KLF10	TGFB INDUCIBLE EARLY GROWTH RESPONSE	NM_031135	A_43_P12535	0.66508	0.00286918	GE1116326	0.400757	0.0714
SPON1	SPONDIN 1	NM_172067	A_43_P13420	0.716993	0.00520004	GE19762	0.141564	0.1978
PSMD9	PROTEASOME (PROSOME, MACROPAIN) 26S SUBUNIT, NON-ATPASE, 9	NM_130430	A_42_P507857	0.600495	0.000797508	GE13282	0.175684	0.0827
ODZ2	NEURESTIN	NM_020088	A_43_P12062	-1.28059	8.65624e-05	GE1100660	-0.9771	0.003
MAOB	MONOAMINE OXIDASE B	NM_013198	A_43_P11752	0.475207	0.00285133	GE21775	-0.209728	0.065
UBLE1A	UBIQUITIN-LIKE 1 (SENTRIN) ACTIVATING ENZYME E1A	NM_001012063	A_42_P505280	0.737559	0.000940088	GE15466	-0.0434972	0.6877
NADSYN1	NAD SYNTHETASE 1	NM_181480	A_43_P21025	-0.406474	0.00386336	GE1153757	0.0836559	0.6223
CAPN7	CALPAIN 7	NM_001030037	A_43_P21347	0.322521	0.00204495	GE18828	-0.00346663	0.9715
MDH2	MALATE DEHYDROGENASE, MITOCHONDRIAL	NM_031151	A_43_P15568	0.473724	0.00252136	GE21081	0.0807941	0.408
ODZ2	NEURESTIN	NM_020088	A_43_P12062	-1.28059	8.65624e-05	GE1122257	-0.90671	2.95e-05
PXK	PX DOMAIN CONTAINING SERINE/THREONINE KINASE	NM_182821	A_43_P22043	-0.682081	0.00617296	GE1234524	-0.311864	0.042
IDH3A	ISOCITRATE DEHYDROGENASE 3 (NAD+) ALPHA	NM_053638	A_43_P12879	0.541619	0.000547144	GE19248	0.0779266	0.3719
HAT1	HISTONE AMINOTRANSFERASE 1	NM_001009657	A_42_P750113	0.526742	0.00146232	GE1189039	0.0692897	0.5183
KCNH1	POTASSIUM VOLTAGE-GATED CHANNEL, SUBFAMILY H (EAG-RELATED), MEMBER 1	NM_031742	A_43_P12658	1.01968	0.000468876	GE22257	0.147567	0.4021
LOC362994	SIMILAR TO NYD-SP28 PROTEIN	NM_001014203	A_42_P485252	0.401478	0.00488158	GE1104121	0.0298416	0.8026
NA	NA	NM_001034926	A_43_P19234	0.629035	0.000338799	GE1240535	-0.0420111	0.6665
CTSS	CATHEPSIN S	NM_017320	A_43_P11914	-0.399647	0.0486854	GE20497	-0.498383	0.0002
TARS	THREONYL-TRNA SYNTHETASE	NM_001006976	A_42_P724600	0.680272	0.000359902	GE16474	0.131458	0.3127
LOC498225	SIMILAR TO LIGATIN	NM_001017489	A_42_P755546	0.508145	0.00471215	GE12207	0.090718	0.4157
KLHL7	KELCH-LIKE 7 (DROSOPHILA)	NM_001012187	A_42_P455053	0.613201	0.00255557	GE1284178	-0.228199	0.0368
CIRH1A	CIRRHOSIS, AUTOSOMAL RECESSIVE 1A (CIRHIN)	NM_001009640	A_42_P704824	0.621306	9.09992e-06	GE17084	0.102188	0.3558
KPNA4	KARYOPHERIN (IMPORTIN) ALPHA 4	NM_001014793	A_43_P18689	0.146928	0.518561	GE1118472	0.827006	0.001
PPP3CA	PROTEIN PHOSPHATASE 3, CATALYTIC SUBUNIT, ALPHA ISOFORM	NM_017041	A_43_P11790	0.126773	0.661729	GE17365	1.14202	0.0007
WDR1	SIMILAR TO WDR1 PROTEIN	NM_001014135	A_43_P22174	0.48998	0.000401786	GE1303932	0.0486547	0.5887
PSMB2	PROTEASOME (PROSOME, MACROPAIN) SUBUNIT, BETA TYPE 2	NM_017284	A_43_P14777	0.317929	0.00167387	GE20474	0.225645	0.0502
SUPV3L1	SUPPRESSOR OF VAR1, 3-LIKE 1 (S. CEREVISIAE)	NM_001012462	A_42_P457895	0.613656	1.67194e-05	GE12243	0.142348	0.2853
ODZ2	NEURESTIN	NM_020088	A_43_P12062	-1.28059	8.65624e-05	GE1192985	-0.896469	1.15e-07
PFKFB2	6-PHOSPHOFRUCTO-2-KINASE/FRUCTOSE-2,6-BIPHOSPHATASE 2	NM_001033964	A_42_P711274	-0.905805	0.000285659	GE1140715	-0.584241	0.0057
RAI14	RETINOIC ACID INDUCED 14	NM_001011947	A_43_P23242	-0.540838	0.00427822	GE1153752	-0.0903421	0.5414
NR3C1	NUCLEAR RECEPTOR SUBFAMILY 3, GROUP C, MEMBER 1	NM_012576	A_43_P15242	-0.0433227	0.86699	GE1186461	-0.706041	9.75e-06
PICALM	PHOSPHATIDYLINOSITOL BINDING CLATHRIN ASSEMBLY PROTEIN	NM_053554	A_43_P12852	0.589929	0.00242271	GE13246	0.0123541	0.9285
SLC3A2	SOLUTE CARRIER FAMILY 3 (ACTIVATORS OF DIBASIC AND NEUTRAL AMINO ACID TRANSPORT), MEMBER 2	NM_019283	A_43_P12007	0.723996	0.00460692	GE21256	-0.133685	0.2335
SCRN1	SECERNIN 1	NM_001025063	A_42_P832159	0.512436	8.38338e-05	GE1121338	0.44615	0.009
PSAT1	PHOSPHOSERINE AMINOTRANSFERASE 1	NM_198738	A_43_P16569	0.826658	0.000777211	GE1284998	-0.245198	0.0389
IFT74	COILED-COIL DOMAIN CONTAINING 2	NM_001007001	A_42_P771533	0.661421	0.000456926	GE1150386	-0.0697547	0.5601
SURF6_PREDICTED	SURFEIT GENE 6 (PREDICTED)	NM_001015014	A_43_P18346	-0.575965	0.000263462	GE1170004	-0.036082	0.7233
ODZ2	NEURESTIN	NM_020088	A_43_P12062	-1.28059	8.65624e-05	GE1247029	-0.563625	0.0011
NTRK2	NEUROTROPHIC TYROSINE KINASE, RECEPTOR, TYPE 2	NM_012731	A_43_P10774	0.494116	0.00249056	GE1263767	0.0342157	0.7637
CREBBP	CREB BINDING PROTEIN	NM_133381	A_43_P20749	-0.2582	0.328377	GE1200421	-0.660406	0.0004
PPP2R2B	PROTEIN PHOSPHATASE 2 (FORMERLY 2A), REGULATORY SUBUNIT B (PR 52), BETA ISOFORM	NM_022209	A_43_P12162	0.331348	0.237945	GE1153173	-0.698061	0.0008
WASPIP	WISKOTT-ALDRICH SYNDROME PROTEIN INTERACTING PROTEIN	NM_057192	A_43_P15351	-0.208326	0.394768	GE1239522	-0.501647	0.0015
CREBBP	CREB BINDING PROTEIN	NM_133381	A_43_P13167	-0.275166	0.0227136	GE1200421	-0.660406	0.0004
TUBB6	SIMILAR TO RIKEN CDNA 2310057H16	NM_001025675	A_43_P13701	0.228882	0.143568	GE1106781	0.831472	0.0003
NARS	ASPARAGINYL-TRNA SYNTHETASE	NM_001025635	A_43_P10894	0.525114	0.00110561	GE1298481	0.0227584	0.8462
PPP2R2A	PROTEIN PHOSPHATASE 2 (FORMERLY 2A), REGULATORY SUBUNIT B (PR 52), ALPHA ISOFORM	NM_053999	A_43_P10171	-0.298688	0.0735002	GE1124945	-0.56811	0.0005
NCAM1	NEURAL CELL ADHESION MOLECULE 1	NM_031521	A_42_P641134	0.155415	0.509579	GE1167460	-0.791857	4.53e-05
ARNTL	ARYL HYDROCARBON RECEPTOR NUCLEAR TRANSLOCATOR-LIKE	NM_024362	A_43_P12424	0.494421	0.00495349	GE1274101	0.215368	0.2224
ADCY5	ADENYLATE CYCLASE 5	NM_022600	A_43_P12256	-0.61304	0.0010031	GE14904	-0.329522	0.216
PPP3R1	PROTEIN PHOSPHATASE 3, REGULATORY SUBUNIT B, ALPHA ISOFORM (CALCINEURIN B, TYPE I)	NM_017309	A_43_P10391	1.62982	0.000449439	GE21570	0.45133	0.0404
SCRN1	SECERNIN 1	NM_001025063	A_42_P832159	0.512436	8.38338e-05	GE1221325	0.218223	0.1642
RAB4B	RAB4B, MEMBER RAS ONCOGENE FAMILY	NM_017355	A_42_P634910	0.454817	0.000887661	GE20523	0.0630887	0.5298
BIN2	BRIDGING INTEGRATOR 2	NM_001012223	A_42_P778347	-0.727196	0.0028788	GE1274621	-0.1181	0.531
PPP2R2A	PROTEIN PHOSPHATASE 2 (FORMERLY 2A), REGULATORY SUBUNIT B (PR 52), ALPHA ISOFORM	NM_053999	A_43_P10171	-0.298688	0.0735002	GE1261730	-0.591179	0.0004
LMO7	LIM DOMAIN ONLY PROTEIN 7	NM_001001515	A_43_P20690	0.0245449	0.853656	GE1305580	-0.575185	0.0012
DLGAP1	DISCS, LARGE (DROSOPHILA) HOMOLOG-ASSOCIATED PROTEIN 1	NM_022946	A_43_P12348	0.953586	1.62427e-05	GE18323	0.302875	0.0421
ITM2A	INTEGRAL MEMBRANE PROTEIN 2A	NM_001025712	A_43_P10269	0.603926	0.00306287	GE1141793	-0.00375589	0.9888
PPP2R2B	PROTEIN PHOSPHATASE 2 (FORMERLY 2A), REGULATORY SUBUNIT B (PR 52), BETA ISOFORM	NM_022209	A_43_P12162	0.331348	0.237945	GE1144404	-0.582728	0.0019
PPP2R2B	PROTEIN PHOSPHATASE 2 (FORMERLY 2A), REGULATORY SUBUNIT B (PR 52), BETA ISOFORM	NM_022209	A_43_P12162	0.331348	0.237945	GE1133262	-0.525538	0.0002
CAMK2G	CALCIUM/CALMODULIN-DEPENDENT PROTEIN KINASE II GAMMA	NM_133605	A_43_P13229	-0.255912	0.0744179	GE1153469	-0.747584	9.46e-05
DLGH2	DISCS, LARGE HOMOLOG 2 (DROSOPHILA)	NM_022282	A_43_P16224	-0.225079	0.0681043	GE1226484	-0.693854	1.89e-05
ODZ2	NEURESTIN	NM_020088	A_43_P12062	-1.28059	8.65624e-05	GE1254946	-0.680845	0.0002
ITGB1	INTEGRIN BETA 1 (FIBRONECTIN RECEPTOR BETA)	NM_017022	A_43_P11780	0.353159	0.00276498	GE21915	0.265917	0.1486
CREBBP	CREB BINDING PROTEIN	NM_133381	A_43_P21909	-0.299093	0.181899	GE1200421	-0.660406	0.0004
TXN1	THIOREDOXIN 1	NM_053800	A_42_P689013	0.562242	0.00352404	GE13574	0.0802483	0.4175
IDE	INSULIN DEGRADING ENZYME	NM_013159	A_43_P11740	NA	NA	GE1174313	-0.60165	0.0012
GAB2	GROWTH FACTOR RECEPTOR BOUND PROTEIN 2-ASSOCIATED PROTEIN 2	NM_053417	A_42_P529077	-0.44448	0.00245903	GE13493	0.028852	0.8427
GTF2I	GENERAL TRANSCRIPTION FACTOR II I	NM_001001512	A_43_P16411	0.659042	0.000215787	GE1217474	-0.0231232	0.8444
IFIT1	INTERFERON-INDUCED PROTEIN WITH TETRATRICOPEPTIDE REPEATS 1	NM_020096	A_43_P15499	0.385227	0.0658242	GE21536	-1.02474	0.0005
PFKFB2	6-PHOSPHOFRUCTO-2-KINASE/FRUCTOSE-2,6-BIPHOSPHATASE 2	NM_001033964	A_42_P711274	-0.905805	0.000285659	GE1123387	0.052555	0.7346
NCAM1	NEURAL CELL ADHESION MOLECULE 1	NM_031521	A_43_P13792	-0.490248	0.0108227	GE1145293	-0.75755	0.0008
SPNA2	ALPHA-SPECTRIN 2	NM_171983	A_43_P10409	-0.8814	0.000950475	GE1156379	0.0805212	0.411
GPD1	GLYCEROL-3-PHOSPHATE DEHYDROGENASE 1 (SOLUBLE)	NM_022215	A_42_P480224	-0.489167	0.0335075	GE1206187	-1.14114	1.62e-05
TERF2IP	TELOMERIC REPEAT BINDING FACTOR 2, INTERACTING PROTEIN	NM_001013143	A_42_P678367	0.735894	0.00211976	GE1295784	-0.0487106	0.6628
PARP3	ADP-RIBOSYLTRANSFERASE (NAD+, POLY (ADP-RIBOSE POLYMERASE)-LIKE 3	NM_001008328	A_43_P19979	-0.638094	0.00263821	GE1169819	0.172872	0.3384
ITGB1	INTEGRIN BETA 1 (FIBRONECTIN RECEPTOR BETA)	NM_017022	A_43_P11780	0.353159	0.00276498	GE20281	0.0250288	0.8623
TCF4	TRANSCRIPTION FACTOR 4	NM_053369	A_42_P524370	NA	NA	GE1276131	-0.671623	0.0001
GAB2	GROWTH FACTOR RECEPTOR BOUND PROTEIN 2-ASSOCIATED PROTEIN 2	NM_053417	A_42_P529077	-0.44448	0.00245903	GE1149092	-0.180332	0.4414
RGD1305984	SIMILAR TO RIKEN CDNA 2610528A15	NM_001034093	A_42_P702581	-0.387467	0.00332823	GE1190839	0.33514	0.1788
ITPR1	INOSITOL 1,4,5-TRIPHOSPHATE RECEPTOR 1	NM_001007235	A_42_P519479	-0.15793	0.315315	GE1257574	-0.417926	0.001
ACSL1	ACYL-COA SYNTHETASE LONG-CHAIN FAMILY MEMBER 1	NM_012820	A_43_P14632	0.826792	0.000725513	GE21628	-0.070815	0.7833
TAF9L	TAF9-LIKE RNA POLYMERASE II, TATA BOX BINDING PROTEIN (TBP)-ASSOCIATED FACTOR, 31KDA	NM_133615	A_43_P13234	-1.61093	0.00162616	GE20927	0.147828	0.3061
PTPRZ1	PROTEIN TYROSINE PHOSPHATASE, RECEPTOR-TYPE, Z POLYPEPTIDE 1	NM_013080	A_42_P475885	0.618481	0.00479421	GE20161	0.03492	0.7722
PXK	PX DOMAIN CONTAINING SERINE/THREONINE KINASE	NM_182821	A_43_P22043	-0.682081	0.00617296	GE1186321	-0.674153	0.0008
PXK	PX DOMAIN CONTAINING SERINE/THREONINE KINASE	NM_182821	A_43_P22043	-0.682081	0.00617296	GE1186321	-0.674153	0.0008
NRCAM	NEURON-GLIA-CAM-RELATED CELL ADHESION MOLECULE	NM_013150	A_43_P17969	0.0620854	0.718136	GE15031	-0.351258	0.0018
TPRKB	SIMILAR TO CGI-121 PROTEIN	NM_001013926	A_42_P810523	0.390401	0.00346628	GE17776	0.194844	0.1792
VPS45	VACUOLAR PROTEIN SORTING 45 (YEAST)	NM_172072	A_42_P794652	0.627571	0.00446007	GE21041	-0.0123153	0.9108
MARK1	MAP/MICROTUBULE AFFINITY-REGULATING KINASE 1	NM_053947	A_43_P12990	0.664242	0.000153506	GE1120342	0.175301	0.1279
YWHAG	TYROSINE 3-MONOOXGENASE/TRYPTOPHAN 5-MONOOXGENASE ACTIVATION PROTEIN, GAMMA POLYPEPTIDE	NM_019376	A_42_P814010	0.819949	0.000936892	GE21579	0.204141	0.1243
ATG7	AUTOPHAGY 7-LIKE (S. CEREVISIAE)	NM_001012097	A_43_P18133	-0.0283717	0.875473	GE1134441	-0.555333	0.0012
ECM1	EXTRACELLULAR MATRIX PROTEIN 1	NM_053882	A_43_P16417	-1.85301	8.71406e-06	GE1109116	0.216238	0.1882
ODZ2	NEURESTIN	NM_020088	A_43_P12062	-1.28059	8.65624e-05	GE1103084	-0.641379	0.0006
MGC94915	SIMILAR TO HYPOTHETICAL PROTEIN	NM_001007009	A_43_P20302	NA	NA	GE1269993	-0.477342	0.0016
ADK	ADENOSINE KINASE	NM_012895	A_43_P11606	0.554342	0.000374478	GE1262827	0.271665	0.3686
ARHGEF1	RHO GUANINE NUCLEOTIDE EXCHANGE FACTOR (GEF) 1	NM_021694	A_43_P12106	-0.589926	0.000638329	GE1154339	0.0949116	0.4313
ARNTL	ARYL HYDROCARBON RECEPTOR NUCLEAR TRANSLOCATOR-LIKE	NM_024362	A_43_P12424	0.494421	0.00495349	GE13178	-0.125321	0.2892
NCAM1	NEURAL CELL ADHESION MOLECULE 1	NM_031521	A_43_P12573	-0.130319	0.517757	GE1297851	-0.709576	0.0002
PGK1	PHOSPHOGLYCERATE KINASE 1	NM_053291	A_43_P12754	-0.788211	0.000412779	GE19688	0.0340748	0.7233
DLGH1	DISCS, LARGE HOMOLOG 1 (DROSOPHILA)	NM_012788	A_43_P11565	-0.0422702	0.791471	GE1272620	-0.759502	0.0001
ARID4B	AT RICH INTERACTIVE DOMAIN 4B (RBP1 LIKE)	NM_053421	A_43_P12803	-0.115103	0.524154	GE1287856	-0.609773	0.0006
NA	NA	NM_001077428	A_42_P609493	0.358357	0.00558561	GE12949	-0.0516982	0.68
TRAK2	AMYOTROPHIC LATERAL SCLEROSIS 2 (JUVENILE) CHROMOSOME REGION, CANDIDATE 3 HOMOLOG (HUMAN)	NM_133560	A_43_P13212	0.0697859	0.576075	GE13737	0.623118	8.45e-05
LOC501619	SIMILAR TO 40S RIBOSOMAL PROTEIN S29	NM_001024367	A_43_P10342	-0.724867	0.000957848	GE1160117	0.0387171	0.8119
TMEM80	SIMILAR TO RIKEN CDNA 5530601I19	NM_001017455	A_43_P19520	0.576218	0.00642362	GE12348	-0.129576	0.195
EPN2	EPSIN 2	NM_001033914	A_43_P12133	-0.888742	0.000118411	GE1162633	0.171847	0.2733
PTHR1	PARATHYROID HORMONE RECEPTOR 1	NM_020073	A_43_P12055	0.11114	0.385741	GE20709	0.828469	0.0008
MYNN	MYONEURIN	NM_001012178	A_43_P18736	0.360966	0.00500087	GE1266179	-0.16537	0.2946
TCF4	TRANSCRIPTION FACTOR 4	NM_053369	A_42_P524370	NA	NA	GE1280593	-0.487824	0.0016
PPP5C	PROTEIN PHOSPHATASE 5, CATALYTIC SUBUNIT	NM_031729	A_42_P740149	-0.318748	0.00452051	GE21148	-0.0169791	0.9383
P2RX7	PURINERGIC RECEPTOR P2X, LIGAND-GATED ION CHANNEL, 7	NM_019256	A_43_P11995	-0.276366	0.12859	GE1244583	-0.707218	0.0002
SEC13L1	SEC13-LIKE 1	NM_001006978	A_43_P16516	0.445036	0.0025355	GE18485	0.182311	0.1328
WDSUB1	WD REPEAT, SAM AND U-BOX DOMAIN CONTAINING 1	NM_001014179	A_43_P17514	-0.578873	0.00275449	GE1236751	-0.290886	0.028
GLT8D1	GLYCOSYLTRANSFERASE AD-017	NM_001007683	A_43_P18153	0.335414	0.00195032	GE1200142	-0.134635	0.2416
PPP2R2A	PROTEIN PHOSPHATASE 2 (FORMERLY 2A), REGULATORY SUBUNIT B (PR 52), ALPHA ISOFORM	NM_053999	A_42_P686362	0.181074	0.392927	GE1261730	-0.591179	0.0004
BSN	BASSOON	NM_019146	A_42_P836888	-0.597426	5.13503e-06	GE1261864	0.100709	0.5622
JUNDP2	JUN DIMERIZATION PROTEIN 2	NM_053894	A_43_P15514	0.0114321	0.918366	GE1211461	-0.648824	0.0014
NCAM1	NEURAL CELL ADHESION MOLECULE 1	NM_031521	A_42_P641134	0.155415	0.509579	GE1145293	-0.75755	0.0008
TARS	THREONYL-TRNA SYNTHETASE	NM_001006976	A_42_P724600	0.680272	0.000359902	GE1306404	0.0299829	0.8023
KCNH1	POTASSIUM VOLTAGE-GATED CHANNEL, SUBFAMILY H (EAG-RELATED), MEMBER 1	NM_031742	A_43_P12658	1.01968	0.000468876	GE1287672	-0.434208	0.01
CREBBP	CREB BINDING PROTEIN	NM_133381	A_42_P558269	0.42456	0.00461522	GE1200421	-0.660406	0.0004
CREBBP	CREB BINDING PROTEIN	NM_133381	A_42_P558269	0.42456	0.00461522	GE1200421	-0.660406	0.0004
PIP5K1B	PHOSPHATIDYLINOSITOL-4-PHOSPHATE 5-KINASE, TYPE 1 ALPHA	NM_001012743	A_43_P21279	0.445864	0.00110496	GE12530	-0.0564912	0.745
ZMAT2	SIMILAR TO HISTIDYL-TRNA SYNTHETASE-LIKE	NM_001014012	A_43_P20899	-0.610803	0.00148782	GE13808	0.153027	0.3598
MTAP1A	MICROTUBULE-ASSOCIATED PROTEIN 1 A	NM_030995	A_43_P15308	-1.01797	4.40693e-06	GE22168	0.109427	0.6261
APBA1	AMYLOID BETA (A4) PRECURSOR PROTEIN-BINDING, FAMILY A, MEMBER 1	NM_031779	A_42_P649121	0.259426	0.151984	GE1258765	-0.741541	0.0003
NCAM1	NEURAL CELL ADHESION MOLECULE 1	NM_031521	A_43_P12573	-0.130319	0.517757	GE1167460	-0.791857	4.53e-05
NA	NA	NM_013119	A_42_P623783	0.822273	9.6745e-05	GE1129870	0.0799754	0.6171
SLC30A3	ZINC TRANSPORTER ZNT-3	NM_001013243	A_43_P16202	-0.70532	0.000765757	GE1240421	0.440952	0.007
CREBBP	CREB BINDING PROTEIN	NM_133381	A_42_P842722	-0.503712	0.0135617	GE1200421	-0.660406	0.0004
WARS	TRYPTOPHANYL-TRNA SYNTHETASE	NM_001013170	A_43_P10163	-0.484195	0.00152129	GE14969	0.123799	0.2868
ODZ2	NEURESTIN	NM_020088	A_43_P12062	-1.28059	8.65624e-05	GE1135887	-0.336974	0.202
MGEA5	MENINGIOMA EXPRESSED ANTIGEN 5 (HYALURONIDASE)	NM_131904	A_43_P15356	0.128008	0.577289	GE1261525	-1.06371	0.0003
NCAM1	NEURAL CELL ADHESION MOLECULE 1	NM_031521	A_43_P13792	-0.490248	0.0108227	GE1167460	-0.791857	4.53e-05
NEDD9	NEURAL PRECURSOR CELL EXPRESSED, DEVELOPMENTALLY DOWN-REGULATED GENE 9	NM_001011922	A_43_P19109	-0.690048	0.000881998	GE1176377	0.0775165	0.5059
TDRD3	TUDOR DOMAIN CONTAINING 3	NM_001012043	A_42_P811328	-0.404336	0.00584519	GE1289576	0.292311	0.2691
HRH3	HISTAMINE RECEPTOR H3	NM_053506	A_43_P15338	-1.35949	1.5853e-08	GE21257	0.0492125	0.8324
PPP2R2A	PROTEIN PHOSPHATASE 2 (FORMERLY 2A), REGULATORY SUBUNIT B (PR 52), ALPHA ISOFORM	NM_053999	A_42_P686362	0.181074	0.392927	GE1124945	-0.56811	0.0005
DAP3	DEATH ASSOCIATED PROTEIN 3	NM_001011950	A_43_P17754	-0.663568	0.000344249	GE1134937	-0.264478	0.0767
BRD8	BROMODOMAIN CONTAINING 8	NM_001008509	A_42_P739653	0.438678	0.00330555	GE1227012	0.0104934	0.9307
PTK2	PTK2 PROTEIN TYROSINE KINASE 2	NM_013081	A_43_P11700	-0.0723944	0.68678	GE1248779	-0.773245	0.0006
HSF2	HEAT SHOCK FACTOR 2	NM_031694	A_43_P12639	0.472066	0.00363105	GE1292137	0.200881	0.2973
IGHMBP2	IMMUNOGLOBULIN MU BINDING PROTEIN 2	NM_031586	A_43_P12601	-0.741997	0.000260798	GE13455	0.18574	0.2358
LOC171412	E-3 EPIDIDYMAL FLUID PROTEIN	NM_134391	A_43_P15602	-0.805083	4.0295e-06	GE1278425	0.132511	0.6922
WDR1	SIMILAR TO WDR1 PROTEIN	NM_001014135	A_43_P22174	0.48998	0.000401786	GE1255320	0.156267	0.3566
TSPAN8	TETRASPANIN 8	NM_133526	A_42_P672907	0.0516038	0.810247	GE21198	0.680954	0.0008
HP1BP3	HETEROCHROMATIN PROTEIN 1, BINDING PROTEIN 3	NM_199108	A_43_P17157	-0.538296	0.00235411	GE1160936	-0.11857	0.2462
SLC29A1	SOLUTE CARRIER FAMILY 29 (NUCLEOSIDE TRANSPORTERS), MEMBER 1	NM_031684	A_43_P14909	-1.34571	8.8782e-06	GE13174	0.328262	0.273
SF3B4	SPLICING FACTOR 3B, SUBUNIT 4	NM_001011951	A_42_P828934	0.361028	0.00170509	GE1268655	0.427821	0.0676
NRCAM	NEURON-GLIA-CAM-RELATED CELL ADHESION MOLECULE	NM_013150	A_43_P15236	0.0278072	0.880942	GE15031	-0.351258	0.0018
CACNA1C	CALCIUM CHANNEL, VOLTAGE-DEPENDENT, L TYPE, ALPHA 1C SUBUNIT	NM_012517	A_43_P15747	0.199738	0.16403	GE1181979	-0.654944	0.0003
SMGB	NEONATAL SUBMANDIBULAR GLAND PROTEIN B	NM_080775	A_43_P15394	0.533119	0.00165361	GE1142057	-0.201244	0.2357
TANC1	TPR DOMAIN, ANKYRIN-REPEAT AND COILED-COIL-CONTAINING	NM_001002854	A_43_P21519	-0.386066	0.00560506	GE1253567	0.534161	0.0035
NCAM1	NEURAL CELL ADHESION MOLECULE 1	NM_031521	A_43_P12573	-0.130319	0.517757	GE1145293	-0.75755	0.0008
ANK	PROGRESSIVE ANKYLOSIS HOMOLOG (MOUSE)	NM_053714	A_43_P12909	0.682926	0.00270388	GE1233836	-0.416	0.0088
NCAM1	NEURAL CELL ADHESION MOLECULE 1	NM_031521	A_43_P13792	-0.490248	0.0108227	GE1297851	-0.709576	0.0002
BRD8	BROMODOMAIN CONTAINING 8	NM_001008509	A_42_P739653	0.438678	0.00330555	GE1159688	-0.372206	0.0262
ODZ2	NEURESTIN	NM_020088	A_43_P12062	-1.28059	8.65624e-05	GE1152128	0.067914	0.6551
ADD1	ADDUCIN 1 (ALPHA)	NM_016990	A_43_P11763	-0.0876167	0.66839	GE18147	-0.662232	0.0017
PCSK2	PROPROTEIN CONVERTASE SUBTILISIN/KEXIN TYPE 2	NM_012746	A_43_P11544	0.305651	0.357571	GE1241149	-0.624377	0.0003
SLC22A6	SOLUTE CARRIER FAMILY 22 (ORGANIC ANION TRANSPORTER), MEMBER 6	NM_017224	A_43_P11868	-0.688713	0.000746947	GE21239	0.214995	0.1225
CLOCK	CLOCK HOMOLOG (MOUSE)	NM_021856	A_43_P15473	0.612064	0.000227722	GE1223313	0.00820001	0.952
CABC1	CHAPERONE, ABC1 ACTIVITY OF BC1 COMPLEX LIKE (S. POMBE)	NM_001013185	A_43_P18020	-0.623249	0.000145118	GE1282523	0.176578	0.1721
RPS26	RIBOSOMAL PROTEIN S26	NM_013224	A_43_P11759	-2.16187	3.21975e-05	GE20253	-0.0110064	0.8897
LOC294513	SIMILAR TO DNAJ (HSP40) HOMOLOG, SUBFAMILY B, MEMBER 12	NM_001013907	A_43_P11339	-0.555863	3.01042e-05	GE1169962	0.139077	0.3247
EGLN2	EGL NINE HOMOLOG 2 (C. ELEGANS)	NM_001004083	A_43_P16638	-0.65706	0.00400936	GE1186652	0.181802	0.2543
LOC500261	MEMBRANE ASSOCIATED GUANYLATE KINASE 1 B NT-SHORT ISOFORM	NM_001030045	A_43_P21026	0.39653	0.00604452	GE1243299	-0.892714	0.0007
PXK	PX DOMAIN CONTAINING SERINE/THREONINE KINASE	NM_182821	A_43_P21415	NA	NA	GE1186321	-0.674153	0.0008
KCNMA1	POTASSIUM LARGE CONDUCTANCE CALCIUM-ACTIVATED CHANNEL, SUBFAMILY M, ALPHA MEMBER 1	NM_031828	A_43_P15328	-0.0653388	0.606706	GE19004	0.746313	0.0012
RALA	V-RAL SIMIAN LEUKEMIA VIRAL ONCOGENE HOMOLOG A (RAS RELATED)	NM_031093	A_42_P494784	-0.347891	0.0856603	GE1304771	-0.604498	0.0006
RNF146	RING FINGER PROTEIN 146	NM_001012060	A_43_P14996	0.573827	0.00347526	GE1233644	-0.225666	0.1749
VEZT	TRANSMEMBRANE PROTEIN VEZATIN	NM_001006984	A_43_P13654	-1.08571	0.00165831	GE14893	0.222557	0.1532
TAF9_PS	TAF9 RNA POLYMERASE II, TATA BOX BINDING PROTEIN (TBP)-ASSOCIATED FACTOR PSEUDOGENE	NM_001012463	A_43_P10802	0.722036	0.00280259	GE1296800	0.0551957	0.5368
SFRS8	SPLICING FACTOR, ARGININE/SERINE-RICH 8 (SUPPRESSOR-OF-WHITE-APRICOT HOMOLOG, DROSOPHILA)	NM_001034924	A_42_P519887	-0.143368	0.528871	GE1167337	-0.460965	0.0012
CYP2E1	CYTOCHROME P450, FAMILY 2, SUBFAMILY E, POLYPEPTIDE 1	NM_031543	A_42_P814662	-0.355566	0.00604741	GE19565	0.340391	0.0843
RAB3IP	RAB3A INTERACTING PROTEIN	NM_017313	A_43_P11911	0.315144	0.122549	GE18626	-0.750737	2.66e-05
KALRN	KALIRIN, RHOGEF KINASE	NM_032062	A_43_P12716	0.297436	0.064296	GE1189749	-0.668639	0.0005
RGD1305984	SIMILAR TO RIKEN CDNA 2610528A15	NM_001034093	A_43_P18334	0.381711	0.00624052	GE1190839	0.33514	0.1788
PSPLA1	PHOSPHATIDYLSERINE-SPECIFIC PHOSPHOLIPASE A1	NM_138882	A_42_P576953	0.438949	0.00488984	GE19548	0.161049	0.3411
HP1BP3	HETEROCHROMATIN PROTEIN 1, BINDING PROTEIN 3	NM_199108	A_43_P17157	-0.538296	0.00235411	GE18310	-0.0396366	0.6933
LYPD1	LY6/PLAUR DOMAIN CONTAINING 1	NM_001007727	A_43_P19561	0.502726	0.00597844	GE1155621	-0.212902	0.3791
TACC2	TRANSFORMING ACIDIC COILED COIL 2	NM_001004415	A_42_P810613	0.534985	0.00118471	GE1240571	-0.134635	0.437
RGD1308123	SIMILAR TO HYPOTHETICAL PROTEIN MGC15716	NM_001009664	A_43_P17664	-1.20165	0.000208818	GE15986	-0.154088	0.1426
CANX	CALNEXIN	NM_172008	A_43_P20894	-0.442453	0.00217091	GE21693	0.0833836	0.5622
SEC14L2	SEC14-LIKE 2 (S. CEREVISIAE)	NM_053801	A_43_P12936	0.242031	0.217762	GE1241918	-0.70275	0.0002
RGD1305984	SIMILAR TO RIKEN CDNA 2610528A15	NM_001034093	A_43_P18334	0.381711	0.00624052	GE1145607	-0.018878	0.8684
MAP3K11	MITOGEN-ACTIVATED PROTEIN KINASE KINASE KINASE 11	NM_001013150	A_43_P20826	-0.681663	0.0049877	GE1263258	0.0384362	0.752
UBADC1	UBIQUITIN ASSOCIATED DOMAIN CONTAINING 1	NM_001007742	A_43_P10639	0.449483	0.000499032	GE1129706	-0.156659	0.4381
BSN	BASSOON	NM_019146	A_42_P836888	-0.597426	5.13503e-06	GE20547	0.207268	0.1901
LOC500261	MEMBRANE ASSOCIATED GUANYLATE KINASE 1 B NT-SHORT ISOFORM	NM_001030045	A_43_P21026	0.39653	0.00604452	GE1212732	-0.564265	0.1139
ABHD1	ABHYDROLASE DOMAIN CONTAINING 1	NM_001008520	A_43_P16913	-0.485465	0.00464923	GE1168972	-0.190009	0.1123
MRIP	MYOSIN PHOSPHATASE-RHO INTERACTING PROTEIN	NM_001034022	A_42_P647008	0.358008	0.139758	GE1281342	-0.615287	0.0013
LMO7	LIM DOMAIN ONLY PROTEIN 7	NM_001001515	A_42_P469142	0.233615	0.438077	GE1305580	-0.575185	0.0012
HCRT	HYPOCRETIN	NM_013179	A_43_P11745	-0.654642	0.00108788	GE20229	-0.10067	0.5292
GPD1	GLYCEROL-3-PHOSPHATE DEHYDROGENASE 1 (SOLUBLE)	NM_022215	A_43_P12167	0.163317	0.161202	GE1206187	-1.14114	1.62e-05
KPNA4	KARYOPHERIN (IMPORTIN) ALPHA 4	NM_001014793	A_43_P20282	0.402201	0.000232031	GE1235898	-0.424881	0.0058
MARK1	MAP/MICROTUBULE AFFINITY-REGULATING KINASE 1	NM_053947	A_43_P12990	0.664242	0.000153506	GE1105592	-0.0166871	0.9694
AFAP	ACTIN FILAMENT ASSOCIATED PROTEIN	NM_080900	A_43_P13095	-1.0375	4.34208e-05	GE1211142	-0.415807	0.2627
VEZT	TRANSMEMBRANE PROTEIN VEZATIN	NM_001006984	A_43_P13654	-1.08571	0.00165831	GE1168679	0.0311128	0.7997
HP1BP3	HETEROCHROMATIN PROTEIN 1, BINDING PROTEIN 3	NM_199108	A_43_P17157	-0.538296	0.00235411	GE1302869	0.644964	0.0449
KCNH1	POTASSIUM VOLTAGE-GATED CHANNEL, SUBFAMILY H (EAG-RELATED), MEMBER 1	NM_031742	A_43_P12658	1.01968	0.000468876	GE1108954	-0.222801	0.1453
CANT1	CALCIUM ACTIVATED NUCLEOTIDASE 1	NM_144754	A_43_P13397	-0.338955	0.00246137	GE1210806	0.224164	0.1157
ZMAT2	SIMILAR TO HISTIDYL-TRNA SYNTHETASE-LIKE	NM_001014012	A_43_P20899	-0.610803	0.00148782	GE1270941	-0.0872735	0.3734
DLGH1	DISCS, LARGE HOMOLOG 1 (DROSOPHILA)	NM_012788	A_43_P11565	-0.0422702	0.791471	GE1208408	-0.786124	2.26e-05
MAPK1	MITOGEN ACTIVATED PROTEIN KINASE 1	NM_053842	A_43_P12954	1.03777	8.00892e-06	GE1144267	-0.132262	0.39
PELP1	SIMILAR TO PROLINE AND GLUTAMIC ACID RICH NUCLEAR PROTEIN; MODULATOR OF NONGENOMIC ACTIVITY OF ESTROGEN RECEPTOR	NM_001024270	A_43_P10805	-0.6569	0.000256839	GE1293835	0.196481	0.2027
SLC3A2	SOLUTE CARRIER FAMILY 3 (ACTIVATORS OF DIBASIC AND NEUTRAL AMINO ACID TRANSPORT), MEMBER 2	NM_019283	A_43_P12007	0.723996	0.00460692	GE20634	-0.167312	0.3866
DNASE1	DEOXYRIBONUCLEASE I	NM_013097	A_42_P657059	-0.687889	9.35513e-05	GE20172	0.134615	0.4315
TERF2IP	TELOMERIC REPEAT BINDING FACTOR 2, INTERACTING PROTEIN	NM_001013143	A_43_P16678	-0.521668	0.00256794	GE17012	-0.0272338	0.7907
MGC114388	SIMILAR TO RIKEN CDNA 4921520P21	NM_001025288	A_43_P23274	0.637759	0.00388079	GE1204014	-0.185409	0.3042
WARS	TRYPTOPHANYL-TRNA SYNTHETASE	NM_001013170	A_43_P10163	-0.484195	0.00152129	GE1268362	0.088413	0.415
PKIG	PROTEIN KINASE INHIBITOR, GAMMA	NM_153469	A_42_P519806	0.503887	0.00291726	GE1102747	-0.491064	0.0268
NFKB2	SIMILAR TO NUCLEAR FACTOR KAPPA B SUBUNIT P100	NM_001008349	A_42_P658264	-0.619804	0.00116239	GE1186357	-0.0114425	0.9344
MARK3	MAP/MICROTUBULE AFFINITY-REGULATING KINASE 3	NM_130749	A_42_P582770	-0.0736103	0.705293	GE1290747	-0.609332	0.0014
PMFBP1	POLYAMINE MODULATED FACTOR 1 BINDING PROTEIN 1	NM_134393	A_42_P527672	-1.12803	0.00409218	GE1152426	0.101381	0.6027
MARK3	MAP/MICROTUBULE AFFINITY-REGULATING KINASE 3	NM_130749	A_42_P582770	-0.0736103	0.705293	GE1124608	-0.630841	0.0006
ARF4	ADP-RIBOSYLATION FACTOR 4	NM_024151	A_43_P12406	0.69826	0.00312788	GE1152657	-0.565545	0.0048
EBP	PHENYLALKYLAMINE CA2+ ANTAGONIST (EMOPAMIL) BINDING PROTEIN	NM_057137	A_43_P13043	-0.41909	0.000793606	GE13289	0.214	0.2207
NA	NA	NM_001044238	A_43_P13460	-0.324426	0.00471968	GE16387	0.184344	0.1632
GRB7	GROWTH FACTOR RECEPTOR BOUND PROTEIN 7	NM_053403	A_43_P12795	-0.993115	0.000107285	GE21474	0.296898	0.0604
PKIG	PROTEIN KINASE INHIBITOR, GAMMA	NM_153469	A_42_P519806	0.503887	0.00291726	GE18875	-0.231413	0.167
LYK5	PROTEIN KINASE LYK5	NM_182820	A_43_P23191	-0.910529	0.000454391	GE1230734	0.221815	0.2423
MAPK1	MITOGEN ACTIVATED PROTEIN KINASE 1	NM_053842	A_43_P12954	1.03777	8.00892e-06	GE1169238	-0.247251	0.1543
PIP5K1B	PHOSPHATIDYLINOSITOL-4-PHOSPHATE 5-KINASE, TYPE 1 ALPHA	NM_001012743	A_43_P21279	0.445864	0.00110496	GE1300281	-0.15859	0.2695
RAI14	RETINOIC ACID INDUCED 14	NM_001011947	A_43_P23242	-0.540838	0.00427822	GE14881	-0.000288568	1
SPON1	SPONDIN 1	NM_172067	A_43_P13420	0.716993	0.00520004	GE1278456	-0.351627	0.158
GABRA1	GAMMA-AMINOBUTYRIC ACID A RECEPTOR, ALPHA 1	NM_183326	A_43_P21148	-0.536377	0.000693993	GE1299222	0.490262	0.0242
SLC9A1	SOLUTE CARRIER FAMILY 9, MEMBER 1	NM_012652	A_42_P548840	-0.59534	0.000397103	GE21852	0.0747794	0.7178
MAPK14	MITOGEN ACTIVATED PROTEIN KINASE 14	NM_031020	A_43_P12479	0.504628	0.0565434	GE1119396	-0.693154	0.0003
MAPK1	MITOGEN ACTIVATED PROTEIN KINASE 1	NM_053842	A_43_P12954	1.03777	8.00892e-06	GE1241527	-0.579275	0.0008
MAPK1	MITOGEN ACTIVATED PROTEIN KINASE 1	NM_053842	A_43_P12954	1.03777	8.00892e-06	GE1241527	-0.579275	0.0008
GABRA1	GAMMA-AMINOBUTYRIC ACID A RECEPTOR, ALPHA 1	NM_183326	A_43_P21148	-0.536377	0.000693993	GE1142466	0.063641	0.522
VAC14	VACUOLE 14 PROTEIN (S. CEREVISIAE)	NM_177930	A_42_P608488	-0.64548	0.006054	GE16585	0.222434	0.2629
PIP5K1B	PHOSPHATIDYLINOSITOL-4-PHOSPHATE 5-KINASE, TYPE 1 ALPHA	NM_001012743	A_43_P21279	0.445864	0.00110496	GE1134007	-0.640704	0.0009
PITPNM1	PHOSPHATIDYLINOSITOL MEMBRANE-ASSOCIATED	NM_001008369	A_43_P20968	-1.50464	0.000215833	GE17219	-0.0301772	0.8
SEC31L1	SEC31-LIKE 1 (S. CEREVISIAE)	NM_033021	A_42_P525283	0.671692	0.00228754	GE1173632	0.0469799	0.8496
PITPNM1	PHOSPHATIDYLINOSITOL MEMBRANE-ASSOCIATED	NM_001008369	A_43_P20968	-1.50464	0.000215833	GE1233678	-0.0284105	0.8119
TH	TYROSINE HYDROXYLASE	NM_012740	A_43_P11541	-1.09943	0.000554563	GE1254069	0.0954519	0.4541
EIF4B	EUKARYOTIC TRANSLATION INITIATION FACTOR 4B	NM_001008324	A_42_P771848	0.585586	0.00373309	GE1121238	-0.78339	0.0152
NA	NA	NM_001077428	A_42_P609493	0.358357	0.00558561	GE1143292	-0.62171	0.0005
TACC2	TRANSFORMING ACIDIC COILED COIL 2	NM_001004415	A_42_P810613	0.534985	0.00118471	GE1255290	-0.132736	0.4337
RAB3IP	RAB3A INTERACTING PROTEIN	NM_017313	A_43_P11911	0.315144	0.122549	GE1159902	-0.578198	0.001
CANT1	CALCIUM ACTIVATED NUCLEOTIDASE 1	NM_144754	A_43_P13397	-0.338955	0.00246137	GE19560	0.0304067	0.7757
PADI1	PEPTIDYL ARGININE DEIMINASE, TYPE I	NM_019332	A_43_P12026	0.512241	0.00277728	GE20665	-0.131629	0.7485
NRD1	N-ARGININE DIBASIC CONVERTASE 1	NM_012993	A_42_P757468	0.302322	0.136353	GE1251540	-0.660178	0.0014
NA	NA	NM_053491	A_42_P599062	-0.975395	0.00022944	GE15715	0.222557	0.1919
VAC14	VACUOLE 14 PROTEIN (S. CEREVISIAE)	NM_177930	A_42_P608488	-0.64548	0.006054	GE1169539	0.169284	0.222
PLAG1	PLEIOMORPHIC ADENOMA GENE 1	NM_001008316	NA	NA	NA	GE1139800	-0.827256	8.65e-05
TUBA8	SIMILAR TO TUBULIN ALPHA-8 CHAIN (ALPHA-TUBULIN 8)	NM_001024339	A_42_P656703	-0.739072	0.00245181	GE1103252	NA	NA
ARF4	ADP-RIBOSYLATION FACTOR 4	NM_024151	A_43_P12406	0.69826	0.00312788	GE1229558	NA	NA
YWHAG	TYROSINE 3-MONOOXGENASE/TRYPTOPHAN 5-MONOOXGENASE ACTIVATION PROTEIN, GAMMA POLYPEPTIDE	NM_019376	A_43_P14134	0.535812	0.00182527	GE20694	0.160146	0.0167
RPS9	RIBOSOMAL PROTEIN S9	NM_031108	A_43_P12515	-0.650618	0.00246212	GE21124	0.0182069	0.8238
MFAP4	MICROFIBRILLAR-ASSOCIATED PROTEIN 4	NM_001034124	NA	NA	NA	GE14497	1.7554	5.71e-06
ARIH2_PREDICTED	ARIADNE HOMOLOG 2 (DROSOPHILA) (PREDICTED)	NM_001012275	A_42_P517253	0.364831	0.00254005	GE1107127	NA	NA
KPNA4	KARYOPHERIN (IMPORTIN) ALPHA 4	NM_001014793	A_43_P20282	0.402201	0.000232031	GE1228433	NA	NA
CXCL9	CHEMOKINE (C-X-C MOTIF) LIGAND 9	NM_145672	NA	NA	NA	GE14232	0.796598	0.0004
PPP3CA	PROTEIN PHOSPHATASE 3, CATALYTIC SUBUNIT, ALPHA ISOFORM	NM_017041	A_42_P645092	0.658633	0.0265651	GE17365	1.14202	0.0007
ZPBP	ZONA PELLUCIDA BINDING PROTEIN	NM_001025139	A_43_P23370	-0.922763	0.00152932	GE1292128	NA	NA
NA	NA	NM_001047099	A_43_P19830	-1.07275	0.00061643	GE16404	0.285816	0.094
RTN1	RETICULON 1	NM_053865	A_42_P524577	0.824222	2.75535e-06	GE1181728	NA	NA
MYLK2	MYOSIN LIGHT CHAIN KINASE 2, SKELETAL MUSCLE	NM_057209	A_43_P13063	-0.948426	5.07295e-05	GE19576	NA	NA
MSL31	SIMILAR TO MALE-SPECIFIC LETHAL 3-LIKE 1 (MSL3-LIKE 1) (MALE-SPECIFIC LETHAL-3 HOMOLOG 1)	NM_001014111	A_43_P10986	0.580756	0.00361752	GE1234285	NA	NA
M6PR	CATION-DEPENDENT MANNOSE-6-PHOSPHATE RECEPTOR	NM_001007700	A_43_P14481	0.789867	0.00474364	GE1205790	0.0425043	0.6831
SF3B4	SPLICING FACTOR 3B, SUBUNIT 4	NM_001011951	A_42_P828934	0.361028	0.00170509	GE1242474	NA	NA
GRM7	GLUTAMATE RECEPTOR, METABOTROPIC 7	NM_031040	A_43_P16386	0.34886	0.00272513	GE1268408	NA	NA
ARF3	ADP-RIBOSYLATION FACTOR 3	NM_080904	A_42_P690520	0.856437	0.00150254	GE19608	0.378623	0.0879
LOC500261	MEMBRANE ASSOCIATED GUANYLATE KINASE 1 B NT-SHORT ISOFORM	NM_001030045	A_43_P21026	0.39653	0.00604452	GE1263995	NA	NA
NTRK2	NEUROTROPHIC TYROSINE KINASE, RECEPTOR, TYPE 2	NM_012731	A_43_P10774	0.494116	0.00249056	GE1114311	NA	NA
IDH3A	ISOCITRATE DEHYDROGENASE 3 (NAD+) ALPHA	NM_053638	A_43_P12879	0.541619	0.000547144	GE17576	NA	NA
PPP2R1B	PROTEIN PHOSPHATASE 2 (FORMERLY 2A), REGULATORY SUBUNIT A (PR 65), BETA ISOFORM	NM_001025418	A_42_P501972	0.463167	0.00201771	GE1184036	NA	NA
LIPC	LIPASE, HEPATIC	NM_012597	A_42_P831978	-1.06506	0.000380891	GE19850	NA	NA
GDF15	GROWTH DIFFERENTIATION FACTOR 15	NM_019216	A_43_P15537	-0.722842	2.96528e-06	GE20590	NA	NA
BCL10	B-CELL CLL/LYMPHOMA 10	NM_031328	A_42_P508784	0.553808	0.00130612	GE1264994	NA	NA
PTDSS1	PHOSPHATIDYLSERINE SYNTHASE 1	NM_001012113	A_43_P18150	0.627034	1.2308e-05	GE1203895	NA	NA
MAP2K1	MITOGEN ACTIVATED PROTEIN KINASE KINASE 1	NM_031643	A_42_P638191	0.959668	9.59886e-05	GE1132798	NA	NA
NOS2	NITRIC OXIDE SYNTHASE 2, INDUCIBLE	NM_012611	A_43_P11486	-0.78234	0.00477664	GE19861	NA	NA
TNP2	TRANSITION PROTEIN 2	NM_017057	A_43_P11798	-0.56408	0.000555397	GE1285790	NA	NA
FOXE1	FORKHEAD BOX E1 (THYROID TRANSCRIPTION FACTOR 2)	NM_138909	A_43_P13335	-1.9409	3.82404e-05	GE21194	NA	NA
GALNT11	UDP-N-ACETYL-ALPHA-D-GALACTOSAMINE:POLYPEPTIDE N-ACETYLGALACTOSAMINYLTRANSFERASE 11 (GALNAC-T11)	NM_199393	A_42_P535743	0.584234	0.00134676	GE1255840	-0.565545	0.0039
CASKIN1	CASK-INTERACTING PROTEIN 1	NM_080690	A_43_P13077	-1.69535	2.26898e-06	GE1156220	NA	NA
MME	MEMBRANE METALLO ENDOPEPTIDASE	NM_012608	A_43_P11484	0.408073	0.000953864	GE19858	NA	NA
PDIA5	PROTEIN DISULFIDE ISOMERASE-ASSOCIATED 5	NM_001014125	A_42_P581686	-0.481226	0.00295774	GE13800	-0.0193166	0.8988
FCER2A	FC RECEPTOR, IGE, LOW AFFINITY II, ALPHA POLYPEPTIDE	NM_001033924	A_42_P577136	-0.367093	0.00530393	GE21137	NA	NA
MRFAP1	MORF4 FAMILY ASSOCIATED PROTEIN 1	NM_001009264	A_42_P544569	0.610073	0.00171238	GE12227	NA	NA
HIST1H1T	HISTONE 1, H1T	NM_012579	A_43_P15522	-0.644464	0.000670432	GE19835	NA	NA
PPP3R2	PROTEIN PHOSPHATASE 3, REGULATORY SUBUNIT B, ALPHA ISOFORM (CALCINEURIN B, TYPE II)	NM_021701	A_42_P626467	0.305754	0.00448997	GE20783	NA	NA
SERPINB7	SERINE (OR CYSTEINE) PROTEINASE INHIBITOR, CLADE B, MEMBER 7	NM_130404	A_43_P13105	-1.15614	0.000154545	GE1305924	NA	NA
MCPT2	MAST CELL PEPTIDASE 2	NM_172044	A_42_P492910	0.561886	0.000100755	GE1125357	NA	NA
PGK1	PHOSPHOGLYCERATE KINASE 1	NM_053291	A_43_P12754	-0.788211	0.000412779	GE1319680	NA	NA
LY6C	LY6-C ANTIGEN	NM_020103	A_43_P12070	-0.648524	0.00369916	GE1163951	NA	NA
ARL2BP	ADP-RIBOSYLATION FACTOR-LIKE 2 BINDING PROTEIN	NM_001024906	A_42_P671971	0.501164	0.00499239	GE17525	NA	NA
LOC498225	SIMILAR TO LIGATIN	NM_001017489	A_42_P755546	0.508145	0.00471215	GE1240436	NA	NA
SLC22A7	SOLUTE CARRIER FAMILY 22 (ORGANIC ANION TRANSPORTER), MEMBER 7	NM_053537	A_42_P554831	-0.915187	0.00436305	GE21717	NA	NA
ARF4	ADP-RIBOSYLATION FACTOR 4	NM_024151	A_43_P12406	0.69826	0.00312788	GE1178128	NA	NA
ARIH2_PREDICTED	ARIADNE HOMOLOG 2 (DROSOPHILA) (PREDICTED)	NM_001012275	A_42_P517253	0.364831	0.00254005	GE12707	NA	NA
RPS9	RIBOSOMAL PROTEIN S9	NM_031108	A_43_P12515	-0.650618	0.00246212	GE1250807	0.246104	0.3528
AKAP1	A KINASE (PRKA) ANCHOR PROTEIN 1	NM_053665	A_42_P771203	0.906816	7.96532e-05	GE21380	NA	NA
AKR1E1	ALDO-KETO REDUCTASE FAMILY 1, MEMBER E1	NM_001008342	A_43_P17528	0.339287	0.00641365	GE1289842	NA	NA
RGD1307128	SIMILAR TO RIKEN CDNA 2810002D13 GENE	NM_001012354	NA	NA	NA	GE1182484	-1.24332	5.39e-05
SLC9A1	SOLUTE CARRIER FAMILY 9, MEMBER 1	NM_012652	A_42_P548840	-0.59534	0.000397103	GE1115766	NA	NA
NTRK2	NEUROTROPHIC TYROSINE KINASE, RECEPTOR, TYPE 2	NM_012731	A_43_P10774	0.494116	0.00249056	GE1178009	NA	NA
UBQLN1	UBIQUILIN 1	NM_053747	A_43_P12922	0.679044	0.00278411	GE13883	NA	NA
BIN2	BRIDGING INTEGRATOR 2	NM_001012223	A_42_P778347	-0.727196	0.0028788	GE1224452	NA	NA
MESDC2	MESODERM DEVELOPMENT CANDIATE 2	NM_001008345	A_43_P21324	0.643964	0.0032979	GE1106909	NA	NA
NA	NA	NM_001044242	A_43_P17074	0.585441	0.000844492	GE1141576	NA	NA
RGN	REGUCALCIN	NM_031546	A_42_P508471	0.414721	0.000526247	GE21281	NA	NA
AGPAT1	1-ACYLGLYCEROL-3-PHOSPHATE O-ACYLTRANSFERASE 1	NM_212458	A_43_P10000	-0.438143	0.00196167	GE1295396	NA	NA
RPL24	RIBOSOMAL PROTEIN L24	NM_022515	A_42_P791328	-0.807892	2.19991e-05	GE1182308	NA	NA
RGD1305755	SIMILAR TO RIKEN CDNA 5033406L14 (PREDICTED)	NM_001039336	NA	NA	NA	GE1180686	-1.0511	0.0002
PGK1	PHOSPHOGLYCERATE KINASE 1	NM_053291	A_43_P12754	-0.788211	0.000412779	GE1319705	NA	NA
PRL4A1	PROLACTIN-LIKE PROTEIN A	NM_017036	A_43_P14880	-0.682608	0.000138891	GE20293	NA	NA
APOE	APOLIPOPROTEIN E	NM_138828	A_43_P13298	-1.78013	1.30588e-05	GE21632	NA	NA
PGK1	PHOSPHOGLYCERATE KINASE 1	NM_053291	A_43_P12754	-0.788211	0.000412779	GE1319689	NA	NA
NA	NA	NM_001047099	A_43_P19830	-1.07275	0.00061643	GE1157433	0.083792	0.5613
HNT	NEUROTRIMIN	NM_017354	A_42_P840836	-0.681896	0.00200133	GE1140942	-0.555757	0.0269
STRBP	DOUBLE-STRANDED RNA-BINDING PROTEIN P74	NM_053416	NA	NA	NA	GE1203265	-0.770043	5.54e-05
HNRPC	HETEROGENEOUS NUCLEAR RIBONUCLEOPROTEIN C	NM_001025633	A_42_P547560	0.632118	0.000537851	GE1286377	NA	NA
FN1	FIBRONECTIN 1	NM_019143	A_42_P774977	0.895454	1.28031e-05	GE22044	NA	NA
GAB2	GROWTH FACTOR RECEPTOR BOUND PROTEIN 2-ASSOCIATED PROTEIN 2	NM_053417	A_42_P529077	-0.44448	0.00245903	GE1101119	NA	NA
LDHC	LACTATE DEHYDROGENASE 3, C CHAIN	NM_017266	A_42_P628803	-0.663734	0.00444802	GE1187354	NA	NA
GALNT11	UDP-N-ACETYL-ALPHA-D-GALACTOSAMINE:POLYPEPTIDE N-ACETYLGALACTOSAMINYLTRANSFERASE 11 (GALNAC-T11)	NM_199393	A_42_P535743	0.584234	0.00134676	GE14608	-0.00737657	0.9476
CLPS	COLIPASE, PANCREATIC	NM_013139	A_43_P11732	-0.48045	0.00524249	GE20205	NA	NA
TPM3	TROPOMYOSIN 3, GAMMA	NM_057208	A_43_P13062	-0.466625	0.00532867	GE15574	-0.00317743	0.975
CSF2RB1	COLONY STIMULATING FACTOR 2 RECEPTOR, BETA 1, LOW-AFFINITY (GRANULOCYTE-MACROPHAGE)	NM_133555	A_43_P13211	-0.525717	0.00301141	GE15759	NA	NA
MAP2K1	MITOGEN ACTIVATED PROTEIN KINASE KINASE 1	NM_031643	A_42_P638191	0.959668	9.59886e-05	GE1192993	NA	NA
MGC72612	SIMILAR TO EXPRESSED SEQUENCE AI449175	NM_001009538	A_43_P20885	0.343605	0.00504163	GE1210506	NA	NA
NTRK2	NEUROTROPHIC TYROSINE KINASE, RECEPTOR, TYPE 2	NM_012731	A_43_P10774	0.494116	0.00249056	GE1122318	NA	NA
NA	NA	NM_001047877	A_43_P20412	-0.624105	0.000188698	GE1258331	NA	NA
TTLL1	TUBULIN TYROSINE LIGASE-LIKE 1	NM_001012200	A_42_P633838	0.432103	0.00288938	GE1153296	NA	NA
LOC499806	SIMILAR TO RIKEN CDNA 4933404M02	NM_001024311	NA	NA	NA	GE1105693	-0.455218	0.0005
RAB4B	RAB4B, MEMBER RAS ONCOGENE FAMILY	NM_017355	A_42_P634910	0.454817	0.000887661	GE1288093	NA	NA
LY6C	LY6-C ANTIGEN	NM_020103	A_43_P12070	-0.648524	0.00369916	GE1286482	NA	NA
PDE4A	PHOSPHODIESTERASE 4A	NM_013101	A_42_P480932	0.387389	0.00275494	GE1265697	NA	NA
TPM1	TROPOMYOSIN 1, ALPHA	NM_001034068	A_42_P523424	0.633295	0.00197227	GE17114	NA	NA
HOMER2	HOMER HOMOLOG 2 (DROSOPHILA)	NM_053309	A_43_P12759	0.383746	0.00182702	GE1134424	NA	NA
NG23	NG23 PROTEIN	NM_001004069	A_43_P22336	-0.56372	0.00198859	GE17802	NA	NA
DYNC2LI1	SIMILAR TO DYNEIN 2 LIGHT INTERMEDIATE CHAIN	NM_001013940	A_43_P23209	0.497417	0.00262418	GE17775	NA	NA
CRK	V-CRK SARCOMA VIRUS CT10 ONCOGENE HOMOLOG (AVIAN)	NM_019302	A_43_P12013	-0.609136	0.000178608	GE12973	NA	NA
ARF4	ADP-RIBOSYLATION FACTOR 4	NM_024151	A_43_P12406	0.69826	0.00312788	GE1297401	NA	NA
RGD1310953	SIMILAR TO RIKEN CDNA 2610510J17	NM_001008366	A_43_P19441	0.466889	0.000391245	GE1190987	NA	NA
RNF135	RING FINGER PROTEIN 135	NM_001012010	A_43_P20056	-0.879335	0.000633661	GE1289302	0.168	0.204
LOC500261	MEMBRANE ASSOCIATED GUANYLATE KINASE 1 B NT-SHORT ISOFORM	NM_001030045	A_43_P21026	0.39653	0.00604452	GE1110518	NA	NA
AZI2	5-AZACYTIDINE INDUCED GENE 2	NM_001025705	A_43_P14849	0.827916	0.00153462	GE1231157	NA	NA
RPS15A	RIBOSOMAL PROTEIN S15A	NM_053982	A_43_P13007	-0.896991	5.15358e-05	GE1271709	NA	NA
RUNX3	RUNT-RELATED TRANSCRIPTION FACTOR 3	NM_130425	A_43_P13119	-1.33051	0.000992712	GE1230177	NA	NA
FN1	FIBRONECTIN 1	NM_019143	A_42_P774977	0.895454	1.28031e-05	GE20544	NA	NA
MAP2K1	MITOGEN ACTIVATED PROTEIN KINASE KINASE 1	NM_031643	A_42_P638191	0.959668	9.59886e-05	GE22249	0.091666	0.3485
AZI2	5-AZACYTIDINE INDUCED GENE 2	NM_001025705	A_42_P524676	0.444163	0.000138363	GE1231157	NA	NA
TSG101	TUMOR SUSCEPTIBILITY GENE 101	NM_181628	A_42_P586361	0.387568	0.00423229	GE15743	NA	NA
JIK	JNK/SAPK-INHIBITORY KINASE	NM_001024254	A_43_P21800	-0.470157	0.000878747	GE1120886	NA	NA
NA	NA	NM_001079936	A_42_P795009	0.853896	4.89948e-05	GE1253208	NA	NA
KLHL7	KELCH-LIKE 7 (DROSOPHILA)	NM_001012187	A_42_P455053	0.613201	0.00255557	GE1229550	NA	NA
IGF2R	INSULIN-LIKE GROWTH FACTOR 2 RECEPTOR	NM_012756	A_43_P11548	0.690555	0.0010944	GE1163060	NA	NA
WSB1	WD REPEAT AND SOCS BOX-CONTAINING 1	NM_001025664	NA	NA	NA	GE1179373	-0.542458	0.0002
IGF2R	INSULIN-LIKE GROWTH FACTOR 2 RECEPTOR	NM_012756	A_43_P11548	0.690555	0.0010944	GE1256196	NA	NA
CMBP	CYTOMATRIX PROTEIN P110	NM_170787	NA	NA	NA	GE1191290	-0.773491	0.0017
CATNA1	CATENIN (CADHERIN-ASSOCIATED PROTEIN), ALPHA 1, 102KDA	NM_001007145	A_43_P19010	0.662919	0.000149971	GE1168701	NA	NA
PRKAG2	PROTEIN KINASE, AMP-ACTIVATED, GAMMA 2 NON-CATALYTIC SUBUNIT	NM_184051	A_42_P680714	0.601333	0.00563089	GE16265	0.399554	0.0333
MTAP1A	MICROTUBULE-ASSOCIATED PROTEIN 1 A	NM_030995	A_43_P15308	-1.01797	4.40693e-06	GE19750	NA	NA
CATNA1	CATENIN (CADHERIN-ASSOCIATED PROTEIN), ALPHA 1, 102KDA	NM_001007145	A_43_P19010	0.662919	0.000149971	GE1273318	NA	NA
AKR1E1	ALDO-KETO REDUCTASE FAMILY 1, MEMBER E1	NM_001008342	A_43_P17528	0.339287	0.00641365	GE1191874	NA	NA
DGKA	DIACYLGLYCEROL KINASE, ALPHA (80 KDA)	NM_080787	A_42_P715592	0.535176	0.00575459	GE1250335	NA	NA
BPGM	2,3-BISPHOSPHOGLYCERATE MUTASE	NM_199382	A_43_P17008	0.436555	0.00481588	GE17258	0.066537	0.4693
AQP2	AQUAPORIN 2	NM_012909	A_42_P763077	-1.02606	0.0001744	GE21416	NA	NA
FN1	FIBRONECTIN 1	NM_019143	A_42_P774977	0.895454	1.28031e-05	GE1166578	NA	NA
SRPK3	SERINE/THREONINE KINASE 23	NM_184045	A_43_P23091	-1.11871	0.000893192	GE1148991	NA	NA
LOC500261	MEMBRANE ASSOCIATED GUANYLATE KINASE 1 B NT-SHORT ISOFORM	NM_001030045	A_43_P21026	0.39653	0.00604452	GE1272696	NA	NA
UGT1A7	UDP GLYCOSYLTRANSFERASE 1 FAMILY, POLYPEPTIDE A7	NM_130407	A_43_P13108	-0.58319	0.00279578	GE1256267	NA	NA
RGD1305984	SIMILAR TO RIKEN CDNA 2610528A15	NM_001034093	A_42_P702581	-0.387467	0.00332823	GE1178055	NA	NA
PFKFB2	6-PHOSPHOFRUCTO-2-KINASE/FRUCTOSE-2,6-BIPHOSPHATASE 2	NM_001033964	A_42_P711274	-0.905805	0.000285659	GE1125138	NA	NA
DUSP5	DUAL SPECIFICITY PHOSPHATASE 5	NM_133578	A_42_P739860	0.548434	0.00653143	GE1269116	NA	NA
CIRH1A	CIRRHOSIS, AUTOSOMAL RECESSIVE 1A (CIRHIN)	NM_001009640	A_42_P704824	0.621306	9.09992e-06	GE1215581	NA	NA
NOS2	NITRIC OXIDE SYNTHASE 2, INDUCIBLE	NM_012611	A_43_P11486	-0.78234	0.00477664	GE21948	NA	NA
GRK1	G PROTEIN-COUPLED RECEPTOR KINASE 1	NM_031096	A_43_P12511	-0.733679	0.000769516	GE1109706	NA	NA
PFKFB2	6-PHOSPHOFRUCTO-2-KINASE/FRUCTOSE-2,6-BIPHOSPHATASE 2	NM_001033964	A_42_P711274	-0.905805	0.000285659	GE21713	NA	NA
ACPL2	SIMILAR TO RIKEN CDNA C130099A20	NM_001007710	A_43_P10119	-0.784523	0.000652379	GE1225221	NA	NA
PPM2C	PROTEIN PHOSPHATASE 2C, MAGNESIUM DEPENDENT, CATALYTIC SUBUNIT	NM_019372	A_42_P545118	0.675218	0.00150457	GE20692	0.512783	0.1336
MAP2K5	MITOGEN ACTIVATED PROTEIN KINASE KINASE 5	NM_001033987	A_42_P485589	0.127667	0.527129	GE1116243	-0.714065	0.0004
DYNLL1	DYNEIN, CYTOPLASMIC, LIGHT CHAIN 1	NM_053319	A_43_P14864	0.622726	0.00222496	GE22022	0.0880059	0.3098
NUDT3	NUDIX (NUCLEOTIDE DIPHOSPHATE LINKED MOIETY X)-TYPE MOTIF 3	NM_001024243	A_43_P11323	-0.395834	0.00471905	GE1189965	NA	NA
LRP16	LRP16 PROTEIN	NM_139337	A_43_P15369	-1.45458	3.03911e-06	GE1150729	NA	NA
IRF1	INTERFERON REGULATORY FACTOR 1	NM_012591	A_43_P11477	0.690818	0.000189823	GE19845	0.0179219	0.9091
TPM3	TROPOMYOSIN 3, GAMMA	NM_057208	A_43_P13062	-0.466625	0.00532867	GE1257707	-0.0260582	0.8174
FGF1	FIBROBLAST GROWTH FACTOR 1	NM_012846	A_43_P15251	-0.796905	0.00271144	GE20006	NA	NA
EXOC2	RSEC5 PROTEIN	NM_134414	A_42_P770458	0.760359	0.000967205	GE1185472	NA	NA
SLC6A9	SOLUTE CARRIER FAMILY 6 (NEUROTRANSMITTER TRANSPORTER, GLYCINE), MEMBER 9	NM_053818	NA	NA	NA	GE1272697	-0.788116	0.002
ARF3	ADP-RIBOSYLATION FACTOR 3	NM_080904	A_42_P690520	0.856437	0.00150254	GE1196441	NA	NA
GJB6	GAP JUNCTION MEMBRANE CHANNEL PROTEIN BETA 6	NM_053388	A_42_P640792	0.125958	0.480101	GE13419	2.53588	0.0003
AZI2	5-AZACYTIDINE INDUCED GENE 2	NM_001025705	A_43_P14849	0.827916	0.00153462	GE1155588	NA	NA
TPM3	TROPOMYOSIN 3, GAMMA	NM_057208	A_43_P13062	-0.466625	0.00532867	GE1175093	-0.564051	0.0027
ARF6	ADP-RIBOSYLATION FACTOR 6	NM_024152	A_43_P12407	0.701947	0.000404396	GE1113354	-0.0440921	0.6336
PPP1R3C	PROTEIN PHOSPHATASE 1, REGULATORY (INHIBITOR) SUBUNIT 3C	NM_001012072	A_43_P21284	0.6197	2.54266e-05	GE1200276	NA	NA
OPCML	OPIOID-BINDING PROTEIN/CELL ADHESION MOLECULE-LIKE	NM_053848	NA	NA	NA	GE1241725	-0.830845	0.0005
PRKAG2	PROTEIN KINASE, AMP-ACTIVATED, GAMMA 2 NON-CATALYTIC SUBUNIT	NM_184051	A_42_P680714	0.601333	0.00563089	GE15178	0.115033	0.2991
SPON1	SPONDIN 1	NM_172067	A_43_P13420	0.716993	0.00520004	GE1223983	NA	NA
LIF	LEUKEMIA INHIBITORY FACTOR	NM_022196	A_43_P12157	-0.491398	0.000145884	GE1266257	0.0747794	0.6056
LRP16	LRP16 PROTEIN	NM_139337	A_43_P15369	-1.45458	3.03911e-06	GE1192957	NA	NA
GTF2I	GENERAL TRANSCRIPTION FACTOR II I	NM_001001512	A_43_P16411	0.659042	0.000215787	GE1182158	NA	NA
PSMA1	PROTEASOME (PROSOME, MACROPAIN) SUBUNIT, ALPHA TYPE 1	NM_017278	A_42_P743301	0.63727	0.00307068	GE20468	NA	NA
VDR	VITAMIN D RECEPTOR	NM_017058	A_43_P11799	-1.01164	0.000223654	GE20308	NA	NA
NOSTRIN	NITRIC OXIDE SYNTHASE TRAFFICKER	NM_001024260	A_42_P461564	0.729488	0.000663949	GE1109064	NA	NA
KCNE1	POTASSIUM VOLTAGE-GATED CHANNEL, ISK-RELATED SUBFAMILY, MEMBER 1	NM_012973	A_42_P635873	-0.430334	0.00275072	GE20093	NA	NA
SERPINA1	SERINE (OR CYSTEINE) PROTEINASE INHIBITOR, CLADE A (ALPHA-1 ANTIPROTEINASE, ANTITRYPSIN), MEMBER 1	NM_022519	A_43_P15291	-1.36508	0.000179649	GE1303133	NA	NA
RPL6	RIBOSOMAL PROTEIN L6	NM_053971	A_42_P669501	-0.465902	0.00050703	GE22199	NA	NA
RNF135	RING FINGER PROTEIN 135	NM_001012010	A_43_P20056	-0.879335	0.000633661	GE14568	-0.0926478	0.3101
ODZ2	NEURESTIN	NM_020088	A_43_P12062	-1.28059	8.65624e-05	GE1207679	NA	NA
NTF3	NEUROTROPHIN 3	NM_031073	A_43_P12501	-1.06316	0.00118961	GE19696	NA	NA
SLC9A1	SOLUTE CARRIER FAMILY 9, MEMBER 1	NM_012652	A_42_P548840	-0.59534	0.000397103	GE1269150	NA	NA
NA	NA	NM_001047877	A_43_P20412	-0.624105	0.000188698	GE1287943	NA	NA
MME	MEMBRANE METALLO ENDOPEPTIDASE	NM_012608	A_43_P11484	0.408073	0.000953864	GE1141399	NA	NA
LOC502894	HYPOTHETICAL PROTEIN LOC502894	NM_001025064	A_42_P675139	0.903243	0.00578748	GE1192166	NA	NA
NTF3	NEUROTROPHIN 3	NM_031073	A_43_P12501	-1.06316	0.00118961	GE1102322	NA	NA
CYP2D4V1	CYTOCHROME P450, FAMILY 2, SUBFAMILY D, POLYPEPTIDE 22	NM_138515	A_43_P13283	-0.891063	0.00213208	GE1259381	0.00446544	0.9791
AZI2	5-AZACYTIDINE INDUCED GENE 2	NM_001025705	A_42_P524676	0.444163	0.000138363	GE1155588	NA	NA
PGK1	PHOSPHOGLYCERATE KINASE 1	NM_053291	A_43_P12754	-0.788211	0.000412779	GE1319773	NA	NA
HNT	NEUROTRIMIN	NM_017354	A_42_P840836	-0.681896	0.00200133	GE20522	-0.541618	0.0104
GRM7	GLUTAMATE RECEPTOR, METABOTROPIC 7	NM_031040	A_43_P16386	0.34886	0.00272513	GE1170060	NA	NA
CD47	CD47 ANTIGEN (RH-RELATED ANTIGEN, INTEGRIN-ASSOCIATED SIGNAL TRANSDUCER)	NM_019195	A_43_P11971	-0.666012	0.000652607	GE1160254	NA	NA
RGD1305984	SIMILAR TO RIKEN CDNA 2610528A15	NM_001034093	A_43_P18334	0.381711	0.00624052	GE1178055	NA	NA
TRIM35	TRIPARTITE MOTIF-CONTAINING 35	NM_001025142	A_42_P494659	0.828973	0.000716172	GE1227244	NA	NA
DR1	DOWN-REGULATOR OF TRANSCRIPTION 1	NM_001011914	A_42_P703701	0.64461	0.000625187	GE1162256	NA	NA
DNAJB13	TESTIS SPERMATOGENESIS APOPTOSIS RELATED PROTEIN 1	NM_001005885	NA	NA	NA	GE1212239	0.570366	0.0006
CREBBP	CREB BINDING PROTEIN	NM_133381	A_42_P558269	0.42456	0.00461522	GE1128059	NA	NA
MARCKSL1	MARCKS-LIKE PROTEIN	NM_030862	NA	NA	NA	GE15735	0.502942	0.0004
PPP3R2	PROTEIN PHOSPHATASE 3, REGULATORY SUBUNIT B, ALPHA ISOFORM (CALCINEURIN B, TYPE II)	NM_021701	A_42_P626467	0.305754	0.00448997	GE21546	NA	NA
LOC362304	SIMILAR TO ORC5-RELATED PROTEIN	NM_001014186	A_42_P831513	0.421823	0.00349629	GE1209704	NA	NA
TDRD3	TUDOR DOMAIN CONTAINING 3	NM_001012043	A_42_P811328	-0.404336	0.00584519	GE1122232	NA	NA
CRK	V-CRK SARCOMA VIRUS CT10 ONCOGENE HOMOLOG (AVIAN)	NM_019302	A_43_P12013	-0.609136	0.000178608	GE20648	NA	NA
HNT	NEUROTRIMIN	NM_017354	A_42_P840836	-0.681896	0.00200133	GE1167223	-0.689893	0.0029
NA	NA	NM_053491	A_42_P599062	-0.975395	0.00022944	GE21824	NA	NA
CIT	CITRON	NM_001029911	A_43_P15913	-0.414352	0.00315293	GE21382	NA	NA
PFKFB2	6-PHOSPHOFRUCTO-2-KINASE/FRUCTOSE-2,6-BIPHOSPHATASE 2	NM_001033964	A_42_P711274	-0.905805	0.000285659	GE1300254	NA	NA
ANK	PROGRESSIVE ANKYLOSIS HOMOLOG (MOUSE)	NM_053714	A_43_P12909	0.682926	0.00270388	GE1260606	NA	NA
LRRC8D	LEUCINE-RICH REPEAT-CONTAINING 5	NM_001008338	A_42_P636002	0.624145	0.00102053	GE1180450	-0.0614507	0.6002
PDE8A	PHOSPHODIESTERASE 8A	NM_198767	A_43_P20574	-0.645356	9.31036e-05	GE1293463	NA	NA
ATP5F1	ATP SYNTHASE, H+ TRANSPORTING, MITOCHONDRIAL F0 COMPLEX, SUBUNIT B, ISOFORM 1	NM_134365	A_42_P743310	0.567426	0.000520955	GE19697	0.0720372	0.5069
CASKIN1	CASK-INTERACTING PROTEIN 1	NM_080690	A_42_P768530	0.37623	0.00604754	GE1156220	NA	NA
CRK	V-CRK SARCOMA VIRUS CT10 ONCOGENE HOMOLOG (AVIAN)	NM_019302	A_43_P12013	-0.609136	0.000178608	GE21604	NA	NA
SH2D2A	SH2 DOMAIN PROTEIN 2A	NM_207605	A_43_P23219	-0.433011	0.00308977	GE1203844	NA	NA
ACSL1	ACYL-COA SYNTHETASE LONG-CHAIN FAMILY MEMBER 1	NM_012820	A_43_P14632	0.826792	0.000725513	GE1289301	NA	NA
LOC56081	CTD-BINDING SR-LIKE RA1	NM_019384	A_43_P12049	-1.48384	0.000190595	GE20699	0.536053	0.1799
GAST	GASTRIN	NM_012849	A_43_P11585	-1.20773	0.000515488	GE1104619	NA	NA
ADH4	ALCOHOL DEHYDROGENASE 4 (CLASS II), PI POLYPEPTIDE	NM_017270	A_43_P14287	0.412105	0.00104254	GE20463	NA	NA
MAP2K1	MITOGEN ACTIVATED PROTEIN KINASE KINASE 1	NM_031643	A_42_P638191	0.959668	9.59886e-05	GE1282407	0.0123541	0.9184
EPB4.1L1	ERYTHROCYTE PROTEIN BAND 4.1-LIKE 1	NM_021681	A_43_P12101	NA	NA	GE1139398	0.646716	0.0004
TMEM10	TRANSMEMBRANE PROTEIN 10	NM_001017386	NA	NA	NA	GE1216844	-0.478949	0.0011
MAPK1	MITOGEN ACTIVATED PROTEIN KINASE 1	NM_053842	A_43_P12954	1.03777	8.00892e-06	GE21828	NA	NA
IRF1	INTERFERON REGULATORY FACTOR 1	NM_012591	A_43_P11477	0.690818	0.000189823	GE21798	0.0783366	0.584
CMKLR1	CHEMOKINE-LIKE RECEPTOR 1	NM_022218	A_43_P12169	-1.37909	0.000221374	GE1180503	NA	NA
CMA1	CHYMASE 1, MAST CELL	NM_013092	A_42_P514868	-0.603629	0.000231329	GE20169	NA	NA
CHFR	CHECKPOINT WITH FORKHEAD AND RING FINGER DOMAINS	NM_001009258	A_43_P10687	0.641053	0.00497519	GE1244944	NA	NA
PDIA5	PROTEIN DISULFIDE ISOMERASE-ASSOCIATED 5	NM_001014125	A_42_P581686	-0.481226	0.00295774	GE1223401	NA	NA
RHOH	RAS HOMOLOG GENE FAMILY, MEMBER H	NM_001013430	A_43_P23152	-0.434945	0.00635906	GE1224080	NA	NA
PGK1	PHOSPHOGLYCERATE KINASE 1	NM_053291	A_43_P12754	-0.788211	0.000412779	GE1319771	NA	NA
MSH5	MUTS HOMOLOG 5	NM_212536	A_43_P23342	-1.09224	0.000464165	GE1305570	NA	NA
PICALM	PHOSPHATIDYLINOSITOL BINDING CLATHRIN ASSEMBLY PROTEIN	NM_053554	A_43_P12852	0.589929	0.00242271	GE1268907	NA	NA
MARK1	MAP/MICROTUBULE AFFINITY-REGULATING KINASE 1	NM_053947	A_43_P12990	0.664242	0.000153506	GE21226	NA	NA
GRM7	GLUTAMATE RECEPTOR, METABOTROPIC 7	NM_031040	A_43_P16386	0.34886	0.00272513	GE1271508	NA	NA
COL27A1	PROCOLLAGEN, TYPE XXVII, ALPHA 1	NM_198747	NA	NA	NA	GE18424	-0.701107	0.0002
MGC94941	SIMILAR TO MKRN1 PROTEIN	NM_001004233	A_43_P16609	0.732694	0.00420543	GE1223592	NA	NA
MYOCD	TRANSCRIPTION FACTOR MYOCARDIN	NM_182667	A_43_P22961	-0.515332	0.00124353	GE1246105	NA	NA
ERRFI1	SIMILAR TO MITOGEN-INDUCIBLE GENE 6 PROTEIN HOMOLOG (MIG-6) (GENE 33 POLYPEPTIDE)	NM_001014071	A_43_P14882	0.69732	0.000161314	GE1199910	NA	NA
TNK2	TYROSINE KINASE, NON-RECEPTOR, 2	NM_001008336	A_43_P17121	-0.316748	0.00607001	GE1241184	NA	NA
PGSG	PROTEOGLYCAN PEPTIDE CORE PROTEIN	NM_020074	A_42_P559737	0.639868	0.0047644	GE20710	NA	NA
MESDC2	MESODERM DEVELOPMENT CANDIATE 2	NM_001008345	A_43_P21324	0.643964	0.0032979	GE14384	NA	NA
SPDY1	SPEEDY HOMOLOG 1 (DROSOPHILA)	NM_138855	A_42_P529780	0.613886	0.00265337	GE1296811	NA	NA
TCF2	TRANSCRIPTION FACTOR 2	NM_013103	A_43_P11714	-0.840882	0.000902294	GE20177	NA	NA
PRKAG2	PROTEIN KINASE, AMP-ACTIVATED, GAMMA 2 NON-CATALYTIC SUBUNIT	NM_184051	A_42_P680714	0.601333	0.00563089	GE18978	0.0507455	0.6038
PRL4A1	PROLACTIN-LIKE PROTEIN A	NM_017036	A_43_P14880	-0.682608	0.000138891	GE1179902	NA	NA
PGK1	PHOSPHOGLYCERATE KINASE 1	NM_053291	A_43_P12754	-0.788211	0.000412779	GE1319716	NA	NA
TSPAN3	TETRASPANIN 3	NM_001005547	A_42_P523233	0.460686	0.00227192	GE14368	0.00633393	0.9378
SDC1	SYNDECAN 1	NM_013026	A_43_P14872	0.49939	0.00232828	GE1300951	NA	NA
ADK	ADENOSINE KINASE	NM_012895	A_43_P11606	0.554342	0.000374478	GE1296212	NA	NA
EPN2	EPSIN 2	NM_001033914	A_43_P12133	-0.888742	0.000118411	GE1296078	NA	NA
NTRK2	NEUROTROPHIC TYROSINE KINASE, RECEPTOR, TYPE 2	NM_012731	A_43_P10774	0.494116	0.00249056	GE1102337	NA	NA
NA	NA	NM_001047103	A_43_P10137	-0.727783	0.000572707	GE1141852	NA	NA
MESDC2	MESODERM DEVELOPMENT CANDIATE 2	NM_001008345	A_43_P21324	0.643964	0.0032979	GE1197477	NA	NA
NA	NA	NM_001044267	A_43_P11019	0.710297	0.00167874	GE1233715	NA	NA
LCP2	LYMPHOCYTE CYTOSOLIC PROTEIN 2	NM_130421	A_42_P671389	0.531787	0.00183389	GE1134521	NA	NA
MGC114388	SIMILAR TO RIKEN CDNA 4921520P21	NM_001025288	A_43_P23274	0.637759	0.00388079	GE1223538	NA	NA
GNMT	GLYCINE N-METHYLTRANSFERASE	NM_017084	A_42_P502960	-0.620176	0.000856073	GE20329	NA	NA
EPN2	EPSIN 2	NM_001033914	A_43_P12133	-0.888742	0.000118411	GE1160276	NA	NA
NA	NA	NM_001077644	A_43_P16215	-0.752034	0.00191862	GE1230806	NA	NA
RGD1304952	SIMILAR TO RIKEN CDNA C530028O21 GENE	NM_001014059	A_43_P18986	-1.09954	0.000609285	GE19411	NA	NA
LRRC23	LEUCINE RICH PROTEIN, B7 GENE	NM_001013165	NA	NA	NA	GE1178232	-0.619049	5.04e-05
IFT74	COILED-COIL DOMAIN CONTAINING 2	NM_001007001	A_42_P771533	0.661421	0.000456926	GE1273809	NA	NA
YWHAG	TYROSINE 3-MONOOXGENASE/TRYPTOPHAN 5-MONOOXGENASE ACTIVATION PROTEIN, GAMMA POLYPEPTIDE	NM_019376	A_43_P14134	0.535812	0.00182527	GE21579	0.204141	0.1243
WARS	TRYPTOPHANYL-TRNA SYNTHETASE	NM_001013170	A_43_P10163	-0.484195	0.00152129	GE1281159	NA	NA
CHFR	CHECKPOINT WITH FORKHEAD AND RING FINGER DOMAINS	NM_001009258	A_43_P10687	0.641053	0.00497519	GE17971	NA	NA
PTGS1	PROSTAGLANDIN-ENDOPEROXIDE SYNTHASE 1	NM_017043	A_43_P11791	-0.435887	0.137495	GE1220885	-0.421979	0.0018
NA	NA	NM_001077645	A_43_P17822	-0.523557	4.98748e-05	GE22126	NA	NA
CYP8B1	CYTOCHROME P450, FAMILY 8, SUBFAMILY B, POLYPEPTIDE 1	NM_031241	A_42_P473074	-0.387624	0.00213427	GE21246	NA	NA
ARC	ACTIVITY REGULATED CYTOSKELETAL-ASSOCIATED PROTEIN	NM_019361	A_43_P12040	-0.424531	0.00235343	GE20683	NA	NA
NR2F2	NUCLEAR RECEPTOR SUBFAMILY 2, GROUP F, MEMBER 2	NM_080778	A_43_P13085	-0.563022	0.00027499	GE1183516	NA	NA
TAF9_PS	TAF9 RNA POLYMERASE II, TATA BOX BINDING PROTEIN (TBP)-ASSOCIATED FACTOR PSEUDOGENE	NM_001012463	A_43_P10802	0.722036	0.00280259	GE1238369	NA	NA
HNT	NEUROTRIMIN	NM_017354	A_42_P840836	-0.681896	0.00200133	GE1102919	-1.07097	2.07e-06
ODZ2	NEURESTIN	NM_020088	A_43_P12062	-1.28059	8.65624e-05	GE1217075	NA	NA
ADCY5	ADENYLATE CYCLASE 5	NM_022600	A_43_P12256	-0.61304	0.0010031	GE1250850	NA	NA
SYT1	SYNAPTOTAGMIN 1	NM_001033680	NA	NA	NA	GE1262957	-0.616392	0.0001
OLFM2	OLFACTOMEDIN 2	NM_001015017	NA	NA	NA	GE1249111	1.28007	0.0004
NA	NA	NM_001047874	A_42_P751368	0.636685	0.000430272	GE1288447	NA	NA
TMEM106B	SIMILAR TO RIKEN CDNA 2310036D22	NM_001004267	A_43_P17169	0.457609	0.0044569	GE16821	NA	NA
GKAP1	G KINASE ANCHORING PROTEIN 1	NM_001012160	A_43_P14355	-0.671038	0.000396629	GE1206517	NA	NA
MGC112830	SIMILAR TO TRANSCRIPTION FACTOR	NM_001025718	A_42_P555710	0.544172	4.66967e-05	GE1109015	NA	NA
CML1	CAMELLO-LIKE 1	NM_133558	NA	NA	NA	GE1205310	-0.481163	0.002
ARF3	ADP-RIBOSYLATION FACTOR 3	NM_080904	A_42_P690520	0.856437	0.00150254	GE1245107	0.0472592	0.707
WDR45L_PREDICTED	SIMILAR TO RIKEN CDNA 0610008N23; D16BWG0193E; DNA SEGMENT, CHR 16, BRIGHAM & WOMENS GENETICS 0193 EXPRESSED (PREDICTED)	NM_001039587	NA	NA	NA	GE1129548	0.676267	0.0012
ARHGEF1	RHO GUANINE NUCLEOTIDE EXCHANGE FACTOR (GEF) 1	NM_021694	A_43_P12106	-0.589926	0.000638329	GE21528	NA	NA
TNK2	TYROSINE KINASE, NON-RECEPTOR, 2	NM_001008336	A_43_P20807	-0.706401	0.00525425	GE1241184	NA	NA
LOC499602	HYPOTHETICAL PROTEIN LOC499602	NM_001025039	NA	NA	NA	GE1183091	-0.516429	0.0018
LRRC50	SIMILAR TO RIKEN CDNA 4930457P18	NM_001014154	A_43_P19563	-0.852234	0.000139106	GE1105900	NA	NA
SCT	SECRETIN	NM_022670	A_43_P15427	0.524849	0.00342082	GE1290911	NA	NA
NA	NA	NM_001047099	A_43_P19830	-1.07275	0.00061643	GE13999	NA	NA
SYT1	SYNAPTOTAGMIN 1	NM_001033680	NA	NA	NA	GE1157854	-0.834442	0.001
TPM3	TROPOMYOSIN 3, GAMMA	NM_057208	A_43_P13062	-0.466625	0.00532867	GE1268982	-0.363828	0.0107
LIPC	LIPASE, HEPATIC	NM_012597	A_42_P831978	-1.06506	0.000380891	GE21755	NA	NA
LRRC50	SIMILAR TO RIKEN CDNA 4930457P18	NM_001014154	A_43_P19563	-0.852234	0.000139106	GE1257367	NA	NA
CAR11	CARBONIC ANHYDRASE 11	NM_175708	NA	NA	NA	GE1276851	-0.385714	0.0002
HIBCH	3-HYDROXYISOBUTYRYL-COENZYME A HYDROLASE	NM_001013112	A_42_P532368	0.638481	0.000730198	GE15212	NA	NA
CMBP	CYTOMATRIX PROTEIN P110	NM_170787	NA	NA	NA	GE1188274	1.53087	0.0011
TMED2	COATED VESICLE MEMBRANE PROTEIN	NM_031722	A_43_P12649	0.807798	0.000337195	GE13762	NA	NA
NDRG2	N-MYC DOWNSTREAM REGULATED GENE 2	NM_133583	A_42_P547616	0.28414	0.351892	GE1269371	-0.479553	0.0014
RPS27	RIBOSOMAL PROTEIN S27	NM_053597	NA	NA	NA	GE13438	-0.280159	0.0014
SYT1	SYNAPTOTAGMIN 1	NM_001033680	NA	NA	NA	GE1296082	-0.683391	0.0006
ABHD14A	SIMILAR TO DORZ1	NM_001009670	A_43_P23127	-0.617701	0.0033526	GE13996	NA	NA
LOC500590	SIMILAR TO T-CELL ANTIGEN 4-1BB PRECURSOR - MOUSE	NM_001025773	NA	NA	NA	GE14916	0.593019	0.0017
LOC500261	MEMBRANE ASSOCIATED GUANYLATE KINASE 1 B NT-SHORT ISOFORM	NM_001030045	A_43_P21026	0.39653	0.00604452	GE1144599	NA	NA
