# Supplementary material for: A Systems Level, Functional Genomics Analysis of Chronic Epilepsy
Source: PLoS One. 2011 Jun 14;6(6):e20763. doi: 10.1371/journal.pone.0020763 (PMC3114768; doi:10.1371/journal.pone.0020763)
Supplement: Table S7 — Differentially expressed genes due to seizures in the lesioned hippocampus. This table summarizes the genes that are differentially expressed between the non-lesioned hippocampi in animals with and without seizures. The gene symbols, gene names, and Refseq identifiers are shown in the first column. The probe on the Agilent platform and the fold change and differential expression p-value for that probe is shown in the fourth, fifth, and sixth columns. The probe on the Codelink platform and the fold change and differential expression p-value for that probe is shown in the seventh, eighth, and ninth columns. (XLS) [file pone.0020763.s009.xls]

## Sheet: Sheet1
Symbol	Gene Name	RefSeq	Agilent	Agi_fc	Agi_pv	Codelink	Cod_fc	Cod_pv
COMT	CATECHOL-O-METHYLTRANSFERASE	NM_012531	A_43_P11447	-0.447916	0.0367664	GE21821	-1.49859	1.79e-05
S100A4	S100 CALCIUM-BINDING PROTEIN A4	NM_012618	A_43_P11489	0.364647	0.678024	GE19865	1.65127	9.85e-05
DDC	DOPA DECARBOXYLASE	NM_012545	A_42_P682435	0.571581	0.00643902	GE19810	-0.0839056	0.6766
GFAP	GLIAL FIBRILLARY ACIDIC PROTEIN	NM_017009	A_43_P11773	-0.0118587	0.983553	GE1283392	1.08284	0.0001
GAS6	GROWTH ARREST SPECIFIC 6	NM_057100	A_43_P13025	0.572959	0.000350656	GE1300029	0.0882773	0.6411
DDC	DOPA DECARBOXYLASE	NM_012545	A_43_P14910	0.881238	0.000230336	GE19810	-0.0839056	0.6766
SERPING1	SERINE (OR CYSTEINE) PEPTIDASE INHIBITOR, CLADE G, MEMBER 1	NM_199093	A_42_P510386	0.769709	0.32659	GE16641	1.73474	0.0002
RGD1306991	SIMILAR TO PROTEIN C20ORF103 PRECURSOR	NM_001014183	A_43_P15047	0.129639	0.788401	GE1111232	-1.40049	9.79e-07
CD164	CD164 ANTIGEN	NM_031812	A_42_P490755	0.800078	0.00532337	GE1280178	0.305912	0.0855
CATNA1	CATENIN (CADHERIN-ASSOCIATED PROTEIN), ALPHA 1, 102KDA	NM_001007145	A_43_P19010	0.714674	5.4919e-05	GE12339	0.265917	0.1707
CRHBP	CORTICOTROPIN RELEASING HORMONE BINDING PROTEIN	NM_139183	A_43_P15518	0.562468	0.00685293	GE1212926	-0.131787	0.5564
VTN	VITRONECTIN	NM_019156	A_43_P14771	0.325447	0.347075	GE21982	1.41462	2.96e-05
PEPD	PEPTIDASE D (MAPPED)	NM_001009641	A_43_P20408	0.416283	0.00692144	GE1288340	0.226385	0.1913
IFNGR1	INTERFERON GAMMA RECEPTOR 1	NM_053783	A_42_P658552	0.786855	0.000365248	GE21481	0.445833	0.0099
CATNA1	CATENIN (CADHERIN-ASSOCIATED PROTEIN), ALPHA 1, 102KDA	NM_001007145	A_42_P669549	0.859235	0.0023997	GE1249788	0.322044	0.0605
CSRP2	CYSTEINE AND GLYCINE-RICH PROTEIN 2	NM_177425	A_42_P727191	0.408267	0.142942	GE20941	0.890096	8.21e-05
RGD1306991	SIMILAR TO PROTEIN C20ORF103 PRECURSOR	NM_001014183	A_43_P23179	0.393691	0.0635209	GE1111232	-1.40049	9.79e-07
PTDSS1	PHOSPHATIDYLSERINE SYNTHASE 1	NM_001012113	A_43_P18150	0.692423	2.3499e-06	GE12525	0.188781	0.1995
LAP3	LEUCINE AMINOPEPTIDASE 3	NM_001011910	A_43_P16921	0.740309	0.00359475	GE1255725	0.398679	0.1381
VTN	VITRONECTIN	NM_019156	A_43_P14771	0.325447	0.347075	GE20554	1.52346	2.01e-05
SMPD1	SPHINGOMYELIN PHOSPHODIESTERASE 1, ACID LYSOSOMAL	NM_001006997	A_42_P781500	0.594389	0.00206305	GE16704	0.179384	0.2584
VIM	VIMENTIN	NM_031140	A_42_P509365	1.21722	0.0527373	GE22154	1.48058	3.84e-05
TUBB6	SIMILAR TO RIKEN CDNA 2310057H16	NM_001025675	A_42_P768467	0.378214	0.240079	GE1106781	1.30644	9.59e-05
RAB11A	RAB11A, MEMBER RAS ONCOGENE FAMILY	NM_031152	A_43_P12544	0.629959	0.00537543	GE1196985	0.511974	0.0265
LYZ	LYSOZYME	NM_012771	A_43_P10020	1.08122	2.5971e-05	GE19957	0.970044	0.001
BHLHB3	BASIC HELIX-LOOP-HELIX DOMAIN CONTAINING, CLASS B3	NM_133303	A_43_P15357	0.541728	0.00638283	GE13162	0.345396	0.022
RGD1305387	SIMILAR TO RIKEN CDNA 2610207I16	NM_001025697	A_43_P17005	0.524995	0.000921505	GE1304654	0.0339339	0.8519
S100A3	S100 CALCIUM BINDING PROTEIN A3	NM_053681	A_43_P12895	-0.00399284	0.991551	GE1129316	1.24616	6.68e-05
SERPINB5	SERINE (OR CYSTEINE) PROTEINASE INHIBITOR, CLADE B, MEMBER 5	NM_057108	A_43_P13030	0.46368	0.00529458	GE20978	0.0603241	0.6847
ALDH3A2	ALDEHYDE DEHYDROGENASE FAMILY 3, SUBFAMILY A2	NM_031731	A_42_P484593	0.719622	0.000889476	GE19734	-0.046176	0.7391
PSAT1	PHOSPHOSERINE AMINOTRANSFERASE 1	NM_198738	A_43_P16569	1.08123	2.603e-05	GE14709	0.189919	0.289
GTF2B	GENERAL TRANSCRIPTION FACTOR IIB	NM_031041	A_42_P568765	0.649882	0.00289326	GE22165	0.14509	0.3759
NA	NA	NM_001079936	A_42_P795009	0.849961	5.22923e-05	GE1202904	0.136848	0.3965
ACSL1	ACYL-COA SYNTHETASE LONG-CHAIN FAMILY MEMBER 1	NM_012820	A_43_P14632	1.13162	1.17242e-05	GE1161545	-0.232599	0.1442
PFKFB2	6-PHOSPHOFRUCTO-2-KINASE/FRUCTOSE-2,6-BIPHOSPHATASE 2	NM_001033964	A_42_P711274	-0.952919	0.000153105	GE1147049	-0.518908	0.0115
AZI2	5-AZACYTIDINE INDUCED GENE 2	NM_001025705	A_43_P14849	0.759207	0.00335237	GE1146173	-0.000865877	1
VTN	VITRONECTIN	NM_019156	A_42_P518441	0.0265666	0.918818	GE21982	1.41462	2.96e-05
KPNA4	KARYOPHERIN (IMPORTIN) ALPHA 4	NM_001014793	A_43_P20282	0.398806	0.000257093	GE1118472	0.232415	0.3882
CATNA1	CATENIN (CADHERIN-ASSOCIATED PROTEIN), ALPHA 1, 102KDA	NM_001007145	A_42_P669549	0.859235	0.0023997	GE12339	0.265917	0.1707
CR16	SH3 DOMAIN BINDING PROTEIN CR16	NM_147211	A_43_P13412	-0.730743	0.00483302	GE20895	-0.187543	0.5391
PUS1	PSEUDOURIDINE SYNTHASE 1	NM_001025563	A_42_P617230	0.54145	0.00266547	GE14142	0.0475384	0.78
WDR1	SIMILAR TO WDR1 PROTEIN	NM_001014135	A_43_P22174	0.519665	0.000199533	GE14697	0.1121	0.3945
STAT1	SIGNAL TRANSDUCER AND ACTIVATOR OF TRANSCRIPTION 1	NM_001034164	A_43_P12727	0.634372	0.00106248	GE13464	0.248656	0.3281
SRP54	SIGNAL RECOGNITION PARTICLE 54	NM_053871	A_42_P528002	0.470415	0.00161181	GE1113325	0.223052	0.309
CATNA1	CATENIN (CADHERIN-ASSOCIATED PROTEIN), ALPHA 1, 102KDA	NM_001007145	A_43_P19010	0.714674	5.4919e-05	GE1249788	0.322044	0.0605
PKLR	PYRUVATE KINASE, LIVER AND RED BLOOD CELL	NM_012624	A_42_P606525	-0.444625	0.00422426	GE1167852	-0.20573	0.2669
MOAP1	MODULATOR OF APOPTOSIS 1	NM_001013101	A_42_P749154	0.710799	0.00584989	GE12651	-0.0585932	0.7023
RFC3	REPLICATION FACTOR C (ACTIVATOR 1) 3	NM_001009629	A_42_P702384	0.44062	0.000663674	GE15981	0.324811	0.118
AZI2	5-AZACYTIDINE INDUCED GENE 2	NM_001025705	A_42_P524676	0.45954	8.85239e-05	GE1146173	-0.000865877	1
CSDA	COLD SHOCK DOMAIN PROTEIN A	NM_031979	A_42_P631493	0.841191	0.000918145	GE21940	0.236584	0.2643
PPM2C	PROTEIN PHOSPHATASE 2C, MAGNESIUM DEPENDENT, CATALYTIC SUBUNIT	NM_019372	A_43_P14919	0.56176	0.0076195	GE20692	0.594835	0.2374
CNTN3	CONTACTIN 3	NM_019329	A_43_P12024	0.464713	0.000114364	GE20663	0.179766	0.4773
VTN	VITRONECTIN	NM_019156	A_42_P518441	0.0265666	0.918818	GE20554	1.52346	2.01e-05
VDR	VITAMIN D RECEPTOR	NM_017058	A_43_P11799	-1.06544	0.000116196	GE21651	-0.376695	0.2261
RPO1-1	RNA POLYMERASE 1-1	NM_001008330	A_43_P15195	0.688965	0.00184741	GE12368	0.160533	0.3802
CR16	SH3 DOMAIN BINDING PROTEIN CR16	NM_147211	A_43_P13412	-0.730743	0.00483302	GE1266020	-0.470129	0.0537
PMP22	PERIPHERAL MYELIN PROTEIN 22	NM_017037	A_42_P459428	0.651926	0.00746607	GE20294	0.325386	0.0546
NTRK2	NEUROTROPHIC TYROSINE KINASE, RECEPTOR, TYPE 2	NM_012731	A_43_P10774	0.621022	0.000226452	GE19928	0.0890913	0.6403
GUCY1B3	GUANYLATE CYCLASE 1, SOLUBLE, BETA 3	NM_012769	A_42_P769033	0.598743	0.00075212	GE1128640	0.167872	0.3311
SCN4B	SODIUM CHANNEL, VOLTAGE-GATED, TYPE IV, BETA	NM_001008880	A_42_P674843	-0.616416	0.019763	GE1192467	-0.947584	0.0002
NR4A3	NEURON-DERIVED ORPHAN RECEPTOR	NM_017352	A_43_P12619	-0.32073	0.237551	GE1192279	-1.39897	0.0002
KLF10	TGFB INDUCIBLE EARLY GROWTH RESPONSE	NM_031135	A_43_P12535	0.758931	0.000811556	GE1116326	0.292075	0.3517
UBE2N	UBIQUITIN-CONJUGATING ENZYME E2N	NM_053928	A_43_P10034	0.513246	0.000413421	GE13107	-0.0316512	0.8613
PSMD9	PROTEASOME (PROSOME, MACROPAIN) 26S SUBUNIT, NON-ATPASE, 9	NM_130430	A_42_P507857	0.592063	0.000923911	GE13282	0.0681893	0.712
ODZ2	NEURESTIN	NM_020088	A_43_P12062	-1.14903	0.000337159	GE1100660	-0.332244	0.3371
HYOU1	HYPOXIA UP-REGULATED 1	NM_001034028	A_43_P13313	-0.409249	0.00116709	GE1155367	-0.317067	0.0956
MAOB	MONOAMINE OXIDASE B	NM_013198	A_43_P11752	0.606196	0.000227879	GE21775	0.0422241	0.7959
UBLE1A	UBIQUITIN-LIKE 1 (SENTRIN) ACTIVATING ENZYME E1A	NM_001012063	A_42_P505280	0.741832	0.000885682	GE15466	-0.14178	0.3117
DND1	DEAD END HOMOLOG 1 (ZEBRAFISH)	NM_001025414	A_42_P574919	0.433333	0.00157346	GE15275	-0.0653703	0.6591
CAPN7	CALPAIN 7	NM_001030037	A_43_P21347	0.289149	0.00516962	GE18828	0.0571383	0.7225
MDH2	MALATE DEHYDROGENASE, MITOCHONDRIAL	NM_031151	A_43_P15568	0.497944	0.0015933	GE21081	-0.0402298	0.7731
DRD4	DOPAMINE RECEPTOR 4	NM_012944	A_43_P15403	-0.4473	0.00393842	GE21846	-0.244856	0.1683
ODZ2	NEURESTIN	NM_020088	A_43_P12062	-1.14903	0.000337159	GE1122257	0.072586	0.7381
CPT2	CARNITINE PALMITOYLTRANSFERASE 2	NM_012930	A_42_P601920	0.53641	0.000671832	GE20064	0.170951	0.3648
PXK	PX DOMAIN CONTAINING SERINE/THREONINE KINASE	NM_182821	A_43_P22043	-0.698865	0.00511875	GE1234524	-0.601212	0.0057
IDH3A	ISOCITRATE DEHYDROGENASE 3 (NAD+) ALPHA	NM_053638	A_43_P12879	0.438255	0.00412493	GE19248	-0.0241497	0.8633
HAT1	HISTONE AMINOTRANSFERASE 1	NM_001009657	A_42_P750113	0.578212	0.000558937	GE1189039	0.0681893	0.6718
NA	NA	NM_001034926	A_43_P19234	0.689503	0.000108556	GE1240535	0.0440443	0.7751
CTSS	CATHEPSIN S	NM_017320	A_43_P11914	-0.563871	0.00658179	GE20497	0.158854	0.3852
TARS	THREONYL-TRNA SYNTHETASE	NM_001006976	A_42_P724600	0.775199	6.90825e-05	GE16474	0.144438	0.3818
SCN2B	SODIUM CHANNEL, VOLTAGE-GATED, TYPE II, BETA	NM_012877	A_43_P11599	-0.545977	0.0033668	GE20028	-0.62371	0.0262
SERPING1	SERINE (OR CYSTEINE) PEPTIDASE INHIBITOR, CLADE G, MEMBER 1	NM_199093	A_43_P16428	-0.2248	0.182879	GE16641	1.73474	0.0002
LOC498225	SIMILAR TO LIGATIN	NM_001017489	A_42_P755546	0.572728	0.00166325	GE12207	0.132511	0.4571
KLHL7	KELCH-LIKE 7 (DROSOPHILA)	NM_001012187	A_42_P455053	0.653604	0.00141374	GE1284178	0.097476	0.6035
CIRH1A	CIRRHOSIS, AUTOSOMAL RECESSIVE 1A (CIRHIN)	NM_001009640	A_42_P704824	0.589572	2.06716e-05	GE17084	0.136454	0.4582
WDR1	SIMILAR TO WDR1 PROTEIN	NM_001014135	A_43_P22174	0.519665	0.000199533	GE1303932	0.0810669	0.5747
PSMB2	PROTEASOME (PROSOME, MACROPAIN) SUBUNIT, BETA TYPE 2	NM_017284	A_43_P14777	0.2967	0.00312047	GE20474	-0.0762803	0.658
RHBDF1	RHOMBOID FAMILY 1 (DROSOPHILA)	NM_001030034	A_43_P19992	-0.569588	0.0058829	GE1140940	0.284869	0.1585
SUPV3L1	SUPPRESSOR OF VAR1, 3-LIKE 1 (S. CEREVISIAE)	NM_001012462	A_42_P457895	0.586118	3.33165e-05	GE12243	0.0127832	0.942
ODZ2	NEURESTIN	NM_020088	A_43_P12062	-1.14903	0.000337159	GE1192985	-0.046623	0.7807
PFKFB2	6-PHOSPHOFRUCTO-2-KINASE/FRUCTOSE-2,6-BIPHOSPHATASE 2	NM_001033964	A_42_P711274	-0.952919	0.000153105	GE1140715	-0.671853	0.0057
RAI14	RETINOIC ACID INDUCED 14	NM_001011947	A_43_P23242	-0.521429	0.00570884	GE1153752	-0.0207795	0.9148
PICALM	PHOSPHATIDYLINOSITOL BINDING CLATHRIN ASSEMBLY PROTEIN	NM_053554	A_43_P12852	0.706504	0.000386657	GE13246	0.0721744	0.7022
SLC3A2	SOLUTE CARRIER FAMILY 3 (ACTIVATORS OF DIBASIC AND NEUTRAL AMINO ACID TRANSPORT), MEMBER 2	NM_019283	A_43_P12007	0.805545	0.00182873	GE21256	0.182819	0.2444
SCRN1	SECERNIN 1	NM_001025063	A_42_P832159	0.390476	0.00182284	GE1121338	0.163499	0.458
PSAT1	PHOSPHOSERINE AMINOTRANSFERASE 1	NM_198738	A_43_P16569	1.08123	2.603e-05	GE1284998	-0.00549268	0.975
IFT74	COILED-COIL DOMAIN CONTAINING 2	NM_001007001	A_42_P771533	0.705331	0.000214497	GE1150386	-0.0511002	0.765
ALDH9A1	ALDEHYDE DEHYDROGENASE FAMILY 9, SUBFAMILY A1	NM_022273	A_43_P12194	0.444536	0.00404255	GE1275806	0.147958	0.2995
SURF6_PREDICTED	SURFEIT GENE 6 (PREDICTED)	NM_001015014	A_43_P18346	-0.591708	0.000189512	GE1170004	0.0949116	0.5322
ODZ2	NEURESTIN	NM_020088	A_43_P12062	-1.14903	0.000337159	GE1247029	-0.325178	0.1335
NTRK2	NEUROTROPHIC TYROSINE KINASE, RECEPTOR, TYPE 2	NM_012731	A_43_P10774	0.621022	0.000226452	GE1263767	-0.0901885	0.5873
PGRMC1	PROGESTERONE RECEPTOR MEMBRANE COMPONENT 1	NM_021766	A_42_P674786	0.525014	0.004822	GE20803	0.120219	0.5303
LARS	LEUCYL-TRNA SYNTHETASE	NM_001009637	A_42_P778023	-0.597903	0.00111812	GE12825	0.0200577	0.891
TUBB6	SIMILAR TO RIKEN CDNA 2310057H16	NM_001025675	A_43_P13701	0.236042	0.13179	GE1106781	1.30644	9.59e-05
NARS	ASPARAGINYL-TRNA SYNTHETASE	NM_001025635	A_43_P10894	0.564344	0.000516213	GE1298481	0.0561673	0.7063
SH3GL3	SH3 DOMAIN PROTEIN 2 C1	NM_031238	A_43_P12546	0.994829	7.63673e-05	GE13487	-0.0537932	0.8269
SCRN1	SECERNIN 1	NM_001025063	A_42_P832159	0.390476	0.00182284	GE1221325	0.14978	0.5122
RAB4B	RAB4B, MEMBER RAS ONCOGENE FAMILY	NM_017355	A_42_P634910	0.506561	0.000266726	GE20523	-0.213236	0.1244
BIN2	BRIDGING INTEGRATOR 2	NM_001012223	A_42_P778347	-0.653239	0.00681792	GE1274621	0.567837	0.0482
DLGAP1	DISCS, LARGE (DROSOPHILA) HOMOLOG-ASSOCIATED PROTEIN 1	NM_022946	A_43_P12348	0.80101	0.000184533	GE18323	-0.0733933	0.7171
BOK	BCL-2-RELATED OVARIAN KILLER PROTEIN	NM_017312	A_43_P11910	0.229652	0.379249	GE14639	-1.16359	0.0002
ODZ2	NEURESTIN	NM_020088	A_43_P12062	-1.14903	0.000337159	GE1254946	-0.0285576	0.9052
ITGB1	INTEGRIN BETA 1 (FIBRONECTIN RECEPTOR BETA)	NM_017022	A_43_P11780	0.410392	0.000639137	GE21915	0.376624	0.0742
TXN1	THIOREDOXIN 1	NM_053800	A_42_P689013	0.634386	0.00116503	GE13574	0.0211954	0.8802
GAB2	GROWTH FACTOR RECEPTOR BOUND PROTEIN 2-ASSOCIATED PROTEIN 2	NM_053417	A_42_P529077	-0.444989	0.00243404	GE13493	-0.161008	0.3927
GTF2I	GENERAL TRANSCRIPTION FACTOR II I	NM_001001512	A_43_P16411	0.633715	0.000344711	GE1217474	0.18612	0.2854
PFKFB2	6-PHOSPHOFRUCTO-2-KINASE/FRUCTOSE-2,6-BIPHOSPHATASE 2	NM_001033964	A_42_P711274	-0.952919	0.000153105	GE1123387	-0.137807	0.464
SPNA2	ALPHA-SPECTRIN 2	NM_171983	A_43_P10409	-1.30353	5.05163e-06	GE1156379	-0.0420111	0.76
PSMD6	PROTEASOME REGULATORY PARTICLE SUBUNIT P44S10	NM_198730	A_42_P716371	0.505275	0.00684023	GE16160	-0.0142081	0.9248
TERF2IP	TELOMERIC REPEAT BINDING FACTOR 2, INTERACTING PROTEIN	NM_001013143	A_42_P678367	0.69236	0.00361177	GE1295784	0.0441843	0.7899
PARP3	ADP-RIBOSYLTRANSFERASE (NAD+, POLY (ADP-RIBOSE POLYMERASE)-LIKE 3	NM_001008328	A_43_P19979	-0.616392	0.00355213	GE1169819	0.414244	0.0548
MYD88	MYELOID DIFFERENTIATION PRIMARY RESPONSE GENE 88	NM_198130	A_42_P798203	0.365938	0.000643844	GE16417	0.384823	0.1195
ITGB1	INTEGRIN BETA 1 (FIBRONECTIN RECEPTOR BETA)	NM_017022	A_43_P11780	0.410392	0.000639137	GE20281	0.238665	0.2842
NA	NA	NM_001047871	A_43_P17573	-0.713789	0.00434421	GE16674	0.0978804	0.6299
GAB2	GROWTH FACTOR RECEPTOR BOUND PROTEIN 2-ASSOCIATED PROTEIN 2	NM_053417	A_42_P529077	-0.444989	0.00243404	GE1149092	-0.223812	0.5076
ACSL1	ACYL-COA SYNTHETASE LONG-CHAIN FAMILY MEMBER 1	NM_012820	A_43_P14632	1.13162	1.17242e-05	GE21628	-0.418504	0.1896
TAF9L	TAF9-LIKE RNA POLYMERASE II, TATA BOX BINDING PROTEIN (TBP)-ASSOCIATED FACTOR, 31KDA	NM_133615	A_43_P13234	-1.77896	0.000591016	GE20927	0.0677764	0.763
PTPRZ1	PROTEIN TYROSINE PHOSPHATASE, RECEPTOR-TYPE, Z POLYPEPTIDE 1	NM_013080	A_42_P475885	0.597585	0.00625569	GE20161	-0.0883468	0.6107
PXK	PX DOMAIN CONTAINING SERINE/THREONINE KINASE	NM_182821	A_43_P22043	-0.698865	0.00511875	GE1186321	-0.221623	0.3692
MARK1	MAP/MICROTUBULE AFFINITY-REGULATING KINASE 1	NM_053947	A_43_P12990	0.743421	3.29913e-05	GE1120342	0.258579	0.1403
YWHAG	TYROSINE 3-MONOOXGENASE/TRYPTOPHAN 5-MONOOXGENASE ACTIVATION PROTEIN, GAMMA POLYPEPTIDE	NM_019376	A_42_P814010	0.920065	0.00025971	GE21579	0.0159257	0.9119
ECM1	EXTRACELLULAR MATRIX PROTEIN 1	NM_053882	A_43_P16417	-1.84397	9.42922e-06	GE1109116	0.425996	0.156
ODZ2	NEURESTIN	NM_020088	A_43_P12062	-1.14903	0.000337159	GE1103084	0.0451634	0.8349
ADK	ADENOSINE KINASE	NM_012895	A_43_P11606	0.619469	9.42598e-05	GE1262827	-0.103457	0.7174
ARHGEF1	RHO GUANINE NUCLEOTIDE EXCHANGE FACTOR (GEF) 1	NM_021694	A_43_P12106	-0.599563	0.000534696	GE1154339	-0.037562	0.8128
PMPCA	PEPTIDASE (MITOCHONDRIAL PROCESSING) ALPHA	NM_001003673	A_43_P15635	0.320863	0.00541604	GE19709	-0.122805	0.3719
PGK1	PHOSPHOGLYCERATE KINASE 1	NM_053291	A_43_P12754	-0.651861	0.00277395	GE19688	-0.0811558	0.5652
TMEM33	TRANSMEMBRANE PROTEIN 33	NM_001034198	A_43_P12096	0.540879	0.0076143	GE20765	-0.131945	0.4779
NA	NA	NM_001077428	A_42_P609493	0.358549	0.00556266	GE12949	-0.0291463	0.872
LOC501619	SIMILAR TO 40S RIBOSOMAL PROTEIN S29	NM_001024367	A_43_P10342	-0.719523	0.00103293	GE1160117	-0.460171	0.0228
EPN2	EPSIN 2	NM_001033914	A_43_P12133	-1.02106	1.64389e-05	GE1162633	-0.0845173	0.6483
SEC13L1	SEC13-LIKE 1	NM_001006978	A_43_P16516	0.456419	0.0020182	GE18485	0.129085	0.4923
WDSUB1	WD REPEAT, SAM AND U-BOX DOMAIN CONTAINING 1	NM_001014179	A_43_P17514	-0.557915	0.00377141	GE1236751	0.0690147	0.7361
AKAP2	A KINASE (PRKA) ANCHOR PROTEIN 2	NM_001011974	A_43_P21674	-0.628481	0.00644519	GE18586	0.0329472	0.832
BSN	BASSOON	NM_019146	A_42_P836888	-0.520769	4.32534e-05	GE1261864	-0.352547	0.1742
TARS	THREONYL-TRNA SYNTHETASE	NM_001006976	A_42_P724600	0.775199	6.90825e-05	GE1306404	0.172872	0.3207
PGM1	PHOSPHOGLUCOMUTASE 1	NM_017033	A_42_P498273	0.561893	0.00680687	GE21931	-0.159879	0.3663
CREBBP	CREB BINDING PROTEIN	NM_133381	A_42_P558269	0.464262	0.00215034	GE1200421	-0.171044	0.3971
NIF3L1	NGG1 INTERACTING FACTOR 3-LIKE 1 (S. POMBE)	NM_001024763	A_43_P17459	-0.979308	0.00161291	GE18223	0.063641	0.7742
PIP5K1B	PHOSPHATIDYLINOSITOL-4-PHOSPHATE 5-KINASE, TYPE 1 ALPHA	NM_001012743	A_43_P21279	0.444699	0.00113437	GE12530	-0.199587	0.373
PGRMC1	PROGESTERONE RECEPTOR MEMBRANE COMPONENT 1	NM_021766	A_42_P674786	0.525014	0.004822	GE21461	0.176706	0.3785
ZMAT2	SIMILAR TO HISTIDYL-TRNA SYNTHETASE-LIKE	NM_001014012	A_43_P20899	-0.625716	0.00117458	GE13808	0.100305	0.6208
MTAP1A	MICROTUBULE-ASSOCIATED PROTEIN 1 A	NM_030995	A_43_P15308	-1.00884	5.12928e-06	GE22168	-0.0412687	0.8699
NA	NA	NM_013119	A_42_P623783	0.654611	0.0013283	GE1129870	0.1396	0.5019
SLC30A3	ZINC TRANSPORTER ZNT-3	NM_001013243	A_43_P16202	-0.871051	5.83498e-05	GE1240421	0.064469	0.7431
CREBBP	CREB BINDING PROTEIN	NM_133381	A_42_P842722	-0.65488	0.00174532	GE1200421	-0.171044	0.3971
SCN4B	SODIUM CHANNEL, VOLTAGE-GATED, TYPE IV, BETA	NM_001008880	A_43_P10334	-0.0331726	0.837664	GE1192467	-0.947584	0.0002
LOC619393	JUN DIMERIZATION PROTEIN 1	NM_001034032	A_42_P476244	0.640826	0.00220225	GE16508	-0.58208	0.0046
WARS	TRYPTOPHANYL-TRNA SYNTHETASE	NM_001013170	A_43_P10163	-0.605581	0.000123078	GE14969	0.113034	0.4351
ODZ2	NEURESTIN	NM_020088	A_43_P12062	-1.14903	0.000337159	GE1135887	-0.107492	0.7192
TBXA2R	THROMBOXANE A2 RECEPTOR	NM_017054	A_43_P11795	-0.475405	0.00276691	GE21580	0.000432744	1
NEDD9	NEURAL PRECURSOR CELL EXPRESSED, DEVELOPMENTALLY DOWN-REGULATED GENE 9	NM_001011922	A_43_P19109	-0.614562	0.00267141	GE1176377	0.129745	0.53
HRH3	HISTAMINE RECEPTOR H3	NM_053506	A_43_P15338	-1.19263	2.51545e-07	GE21257	-0.0363779	0.9029
DAP3	DEATH ASSOCIATED PROTEIN 3	NM_001011950	A_43_P17754	-0.662848	0.000348628	GE1134937	-0.691523	0.0002
DAP3	DEATH ASSOCIATED PROTEIN 3	NM_001011950	A_43_P17754	-0.662848	0.000348628	GE1134937	-0.691523	0.0002
HSPB8	HEAT SHOCK 22KDA PROTEIN 8	NM_053612	A_43_P12870	-0.753335	0.00216613	GE16019	0.478092	0.0542
GNG8	GUANINE NUCLEOTIDE BINDING PROTEIN (G PROTEIN), GAMMA 8 SUBUNIT	NM_139185	A_43_P13371	-0.350506	0.0014249	GE19655	0.219835	0.3076
HSF2	HEAT SHOCK FACTOR 2	NM_031694	A_43_P12639	0.460008	0.00448845	GE1292137	-0.0320936	0.8823
IGHMBP2	IMMUNOGLOBULIN MU BINDING PROTEIN 2	NM_031586	A_43_P12601	-0.676231	0.000744268	GE13455	0.083792	0.6865
LOC171412	E-3 EPIDIDYMAL FLUID PROTEIN	NM_134391	A_43_P15602	-0.873086	9.52119e-07	GE1278425	0.193961	0.5295
WDR1	SIMILAR TO WDR1 PROTEIN	NM_001014135	A_43_P22174	0.519665	0.000199533	GE1255320	-0.219774	0.2466
LOC499913	SIMILAR TO PROTEIN C20ORF22 HOMOLOG	NM_001024314	A_43_P10403	0.569496	0.00405119	GE1274817	0.0571383	0.6935
HP1BP3	HETEROCHROMATIN PROTEIN 1, BINDING PROTEIN 3	NM_199108	A_43_P17157	-0.589212	0.000990151	GE1160936	-0.0614507	0.6362
SLC29A1	SOLUTE CARRIER FAMILY 29 (NUCLEOSIDE TRANSPORTERS), MEMBER 1	NM_031684	A_43_P14909	-1.14845	9.18219e-05	GE13174	0.822363	0.0562
RHBDF1	RHOMBOID FAMILY 1 (DROSOPHILA)	NM_001030034	A_43_P19992	-0.569588	0.0058829	GE12940	0.386701	0.0649
NA	NA	NM_001077673	A_43_P23316	0.384579	0.00230904	GE1210189	-0.0415656	0.8499
SF3B4	SPLICING FACTOR 3B, SUBUNIT 4	NM_001011951	A_42_P828934	0.310805	0.00607984	GE1268655	0.144699	0.5467
ZC3H8	ZINC FINGER CCCH TYPE DOMAIN CONTAINING 8	NM_001012090	A_42_P497153	-0.419946	0.00377911	GE1187005	-0.0531943	0.7909
SMGB	NEONATAL SUBMANDIBULAR GLAND PROTEIN B	NM_080775	A_43_P15394	0.634924	0.000253372	GE1142057	-0.266906	0.2421
TANC1	TPR DOMAIN, ANKYRIN-REPEAT AND COILED-COIL-CONTAINING	NM_001002854	A_43_P21519	-0.444536	0.00167531	GE1253567	-0.0136255	0.9582
ANK	PROGRESSIVE ANKYLOSIS HOMOLOG (MOUSE)	NM_053714	A_43_P12909	0.728135	0.00149967	GE1233836	-0.144329	0.485
TMEM33	TRANSMEMBRANE PROTEIN 33	NM_001034198	A_43_P12096	0.540879	0.0076143	GE1123001	0.0825664	0.7015
ODZ2	NEURESTIN	NM_020088	A_43_P12062	-1.14903	0.000337159	GE1152128	-0.0341603	0.8582
SLC22A6	SOLUTE CARRIER FAMILY 22 (ORGANIC ANION TRANSPORTER), MEMBER 6	NM_017224	A_43_P11868	-0.538569	0.00673728	GE21239	0.0783366	0.646
CLOCK	CLOCK HOMOLOG (MOUSE)	NM_021856	A_43_P15473	0.604162	0.000266465	GE1223313	-0.165855	0.4048
LCP1	LYMPHOCYTE CYTOSOLIC PROTEIN 1	NM_001012044	A_43_P22080	-0.0567875	0.771083	GE17594	5.09349	0.0001
CABC1	CHAPERONE, ABC1 ACTIVITY OF BC1 COMPLEX LIKE (S. POMBE)	NM_001013185	A_43_P18020	-0.492097	0.00193227	GE1282523	0.0839282	0.661
CDK9	CYCLIN-DEPENDENT KINASE 9	NM_001007743	A_43_P19318	0.400315	0.00237021	GE13697	-0.436744	0.148
RPS26	RIBOSOMAL PROTEIN S26	NM_013224	A_43_P11759	-2.13958	3.74418e-05	GE20253	0.0405418	0.7212
LOC294513	SIMILAR TO DNAJ (HSP40) HOMOLOG, SUBFAMILY B, MEMBER 12	NM_001013907	A_43_P11339	-0.55725	2.90177e-05	GE1169962	0.0855606	0.6122
EGLN2	EGL NINE HOMOLOG 2 (C. ELEGANS)	NM_001004083	A_43_P16638	-0.638279	0.00506091	GE1186652	-0.0250302	0.8728
ALOX5AP	ARACHIDONATE 5-LIPOXYGENASE ACTIVATING PROTEIN	NM_017260	A_43_P11885	-0.502068	0.00702833	GE22122	-0.302048	0.221
SYCP3	SYNAPTONEMAL COMPLEX PROTEIN 3	NM_013041	A_42_P662939	0.430653	0.0031317	GE1194335	-0.101598	0.6555
VEZT	TRANSMEMBRANE PROTEIN VEZATIN	NM_001006984	A_43_P13654	-1.40262	9.04433e-05	GE14893	0.136323	0.4928
TAF9_PS	TAF9 RNA POLYMERASE II, TATA BOX BINDING PROTEIN (TBP)-ASSOCIATED FACTOR PSEUDOGENE	NM_001012463	A_43_P10802	0.720493	0.00285533	GE1296800	-0.142258	0.3579
CNNM2	CYCLIN M2	NM_001011942	A_43_P21970	0.367676	0.00135293	GE1125383	-0.044836	0.8555
CYP2E1	CYTOCHROME P450, FAMILY 2, SUBFAMILY E, POLYPEPTIDE 1	NM_031543	A_42_P814662	-0.422524	0.00136141	GE19565	0.268075	0.2717
RAB3IP	RAB3A INTERACTING PROTEIN	NM_017313	A_43_P11911	0.258301	0.203364	GE18626	-0.985359	5.47e-05
UBAP1	UBIQUITIN-ASSOCIATED PROTEIN 1	NM_001012190	A_43_P16851	-0.467791	0.00367431	GE1295593	0.739589	0.0225
RGD1305984	SIMILAR TO RIKEN CDNA 2610528A15	NM_001034093	A_43_P18334	0.419645	0.00289584	GE1190839	-0.234126	0.299
HP1BP3	HETEROCHROMATIN PROTEIN 1, BINDING PROTEIN 3	NM_199108	A_43_P17157	-0.589212	0.000990151	GE18310	-0.0273809	0.8521
LYPD1	LY6/PLAUR DOMAIN CONTAINING 1	NM_001007727	A_43_P19561	0.696189	0.000253376	GE1155621	0.369606	0.2469
LCP1	LYMPHOCYTE CYTOSOLIC PROTEIN 1	NM_001012044	A_43_P20376	NA	NA	GE17594	5.09349	0.0001
TACC2	TRANSFORMING ACIDIC COILED COIL 2	NM_001004415	A_42_P810613	0.519987	0.00156358	GE1240571	-0.0723311	0.7303
PAX4	PAIRED BOX GENE 4	NM_031799	A_43_P12686	-0.386352	0.00693064	GE1103365	0.206643	0.3527
ALOX5AP	ARACHIDONATE 5-LIPOXYGENASE ACTIVATING PROTEIN	NM_017260	A_43_P11885	-0.502068	0.00702833	GE20454	-0.332971	0.1544
RGD1308123	SIMILAR TO HYPOTHETICAL PROTEIN MGC15716	NM_001009664	A_43_P17664	-1.28618	8.70909e-05	GE15986	-0.0591943	0.6855
CANX	CALNEXIN	NM_172008	A_43_P20894	-0.412352	0.00399233	GE21693	0.0503276	0.7785
RGD1305984	SIMILAR TO RIKEN CDNA 2610528A15	NM_001034093	A_43_P18334	0.419645	0.00289584	GE1145607	-0.163268	0.3301
HYOU1	HYPOXIA UP-REGULATED 1	NM_001034028	A_43_P13313	-0.409249	0.00116709	GE1151920	-0.185245	0.3148
MAP3K11	MITOGEN-ACTIVATED PROTEIN KINASE KINASE KINASE 11	NM_001013150	A_43_P20826	-0.661385	0.00629503	GE1263258	0.104068	0.5704
STAP2	SIGNAL-TRANSDUCING ADAPTOR PROTEIN-2	NM_001025026	A_42_P496739	-0.723606	0.00486751	GE15381	0.304277	0.2013
UBADC1	UBIQUITIN ASSOCIATED DOMAIN CONTAINING 1	NM_001007742	A_43_P10639	0.387341	0.00223437	GE1129706	-0.010425	0.959
BSN	BASSOON	NM_019146	A_42_P836888	-0.520769	4.32534e-05	GE20547	-0.195946	0.3621
ABHD1	ABHYDROLASE DOMAIN CONTAINING 1	NM_001008520	A_43_P16913	-0.524683	0.00240997	GE1168972	-0.212066	0.2555
SYCP3	SYNAPTONEMAL COMPLEX PROTEIN 3	NM_013041	A_42_P662939	0.430653	0.0031317	GE14172	0.0583858	0.7267
HCRT	HYPOCRETIN	NM_013179	A_43_P11745	-0.608752	0.00218176	GE20229	2.55636	0.0362
DAP3	DEATH ASSOCIATED PROTEIN 3	NM_001011950	A_42_P642077	0.232845	0.244513	GE1134937	-0.691523	0.0002
KPNA4	KARYOPHERIN (IMPORTIN) ALPHA 4	NM_001014793	A_43_P20282	0.398806	0.000257093	GE1235898	-0.0778022	0.6916
MARK1	MAP/MICROTUBULE AFFINITY-REGULATING KINASE 1	NM_053947	A_43_P12990	0.743421	3.29913e-05	GE1105592	-0.522841	0.1582
GRAMD3	SIMILAR TO RIKEN CDNA 9130427A09	NM_001014011	A_43_P21355	-0.844231	0.00323208	GE1248069	0.136979	0.4182
AFAP	ACTIN FILAMENT ASSOCIATED PROTEIN	NM_080900	A_43_P13095	-1.03246	4.65426e-05	GE1211142	5.99552	0.1911
VEZT	TRANSMEMBRANE PROTEIN VEZATIN	NM_001006984	A_43_P13654	-1.40262	9.04433e-05	GE1168679	0.0174944	0.914
HP1BP3	HETEROCHROMATIN PROTEIN 1, BINDING PROTEIN 3	NM_199108	A_43_P17157	-0.589212	0.000990151	GE1302869	-0.370527	0.3518
UBAP1	UBIQUITIN-ASSOCIATED PROTEIN 1	NM_001012190	A_43_P16851	-0.467791	0.00367431	GE14186	0.121281	0.5354
CANT1	CALCIUM ACTIVATED NUCLEOTIDASE 1	NM_144754	A_43_P13397	-0.396302	0.000517418	GE1210806	0.181675	0.3341
ZMAT2	SIMILAR TO HISTIDYL-TRNA SYNTHETASE-LIKE	NM_001014012	A_43_P20899	-0.625716	0.00117458	GE1270941	0.0758749	0.6254
MAPK1	MITOGEN ACTIVATED PROTEIN KINASE 1	NM_053842	A_43_P12954	0.852411	0.000139408	GE1144267	0.204642	0.376
PELP1	SIMILAR TO PROLINE AND GLUTAMIC ACID RICH NUCLEAR PROTEIN; MODULATOR OF NONGENOMIC ACTIVITY OF ESTROGEN RECEPTOR	NM_001024270	A_43_P10805	-0.629457	0.000423168	GE1293835	0.211635	0.3014
SLC3A2	SOLUTE CARRIER FAMILY 3 (ACTIVATORS OF DIBASIC AND NEUTRAL AMINO ACID TRANSPORT), MEMBER 2	NM_019283	A_43_P12007	0.805545	0.00182873	GE20634	-0.152805	0.4605
DNASE1	DEOXYRIBONUCLEASE I	NM_013097	A_42_P657059	-0.784355	1.40042e-05	GE20172	0.117961	0.5822
COL5A3	COLLAGEN, TYPE V, ALPHA 3	NM_021760	A_43_P12118	-0.716747	0.00190814	GE20799	0.322966	0.0922
TERF2IP	TELOMERIC REPEAT BINDING FACTOR 2, INTERACTING PROTEIN	NM_001013143	A_43_P16678	-0.519239	0.00267588	GE17012	0.0490731	0.7498
MGC114388	SIMILAR TO RIKEN CDNA 4921520P21	NM_001025288	A_43_P23274	0.840336	0.000239193	GE1204014	-0.62171	0.0065
WARS	TRYPTOPHANYL-TRNA SYNTHETASE	NM_001013170	A_43_P10163	-0.605581	0.000123078	GE1268362	-0.0985055	0.4656
NFKB2	SIMILAR TO NUCLEAR FACTOR KAPPA B SUBUNIT P100	NM_001008349	A_42_P658264	-0.584809	0.00202876	GE1186357	0.441696	0.0525
PMFBP1	POLYAMINE MODULATED FACTOR 1 BINDING PROTEIN 1	NM_134393	A_42_P527672	-1.14751	0.00355136	GE1152426	-0.0723311	0.7487
PFN1	PROFILIN 1	NM_022511	A_43_P12231	-1.03315	0.00340499	GE1137245	0.257855	0.1448
ARF4	ADP-RIBOSYLATION FACTOR 4	NM_024151	A_43_P12406	0.633893	0.00677148	GE1152657	-0.0951113	0.6686
EBP	PHENYLALKYLAMINE CA2+ ANTAGONIST (EMOPAMIL) BINDING PROTEIN	NM_057137	A_43_P13043	-0.406858	0.00107673	GE13289	-0.163106	0.391
CREBBP	CREB BINDING PROTEIN	NM_133381	A_42_P842722	-0.65488	0.00174532	GE1223132	0.016211	0.9265
MOCS2	MOLYBDOPTERIN SYNTHASE	NM_001007633	A_42_P816841	0.503722	0.00676641	GE1249274	0.0233263	0.9236
NA	NA	NM_001044238	A_43_P13460	-0.360483	0.00190475	GE16387	-0.018878	0.9236
CREBBP	CREB BINDING PROTEIN	NM_133381	A_42_P842722	-0.65488	0.00174532	GE14074	0.032383	0.8563
GRB7	GROWTH FACTOR RECEPTOR BOUND PROTEIN 7	NM_053403	A_43_P12795	-0.980753	0.000126353	GE21474	-0.0256175	0.8998
LYK5	PROTEIN KINASE LYK5	NM_182820	A_43_P23191	-0.90192	0.000505413	GE1230734	0.0313952	0.8932
MAPK1	MITOGEN ACTIVATED PROTEIN KINASE 1	NM_053842	A_43_P12954	0.852411	0.000139408	GE1169238	-0.267427	0.1887
NIF3L1	NGG1 INTERACTING FACTOR 3-LIKE 1 (S. POMBE)	NM_001024763	A_43_P17459	-0.979308	0.00161291	GE16853	0.195977	0.3253
PIP5K1B	PHOSPHATIDYLINOSITOL-4-PHOSPHATE 5-KINASE, TYPE 1 ALPHA	NM_001012743	A_43_P21279	0.444699	0.00113437	GE1300281	0.113834	0.5698
RAI14	RETINOIC ACID INDUCED 14	NM_001011947	A_43_P23242	-0.521429	0.00570884	GE14881	-0.0584429	0.7489
GABRA1	GAMMA-AMINOBUTYRIC ACID A RECEPTOR, ALPHA 1	NM_183326	A_43_P21148	-0.493878	0.00159844	GE1299222	0.18954	0.3354
UNC84A	UNC-84 HOMOLOG A	NM_001007147	A_43_P21660	0.373936	0.00659278	GE18001	-0.159718	0.5734
SLC9A1	SOLUTE CARRIER FAMILY 9, MEMBER 1	NM_012652	A_42_P548840	-0.575043	0.000585477	GE21852	0.151469	0.5562
MAPK1	MITOGEN ACTIVATED PROTEIN KINASE 1	NM_053842	A_43_P12954	0.852411	0.000139408	GE1241527	-0.0764324	0.7503
GABRA1	GAMMA-AMINOBUTYRIC ACID A RECEPTOR, ALPHA 1	NM_183326	A_43_P21148	-0.493878	0.00159844	GE1142466	0.0962619	0.4664
VAC14	VACUOLE 14 PROTEIN (S. CEREVISIAE)	NM_177930	A_42_P608488	-0.64771	0.00589711	GE16585	0.108089	0.6009
PIP5K1B	PHOSPHATIDYLINOSITOL-4-PHOSPHATE 5-KINASE, TYPE 1 ALPHA	NM_001012743	A_43_P21279	0.444699	0.00113437	GE1134007	-0.33898	0.1095
PITPNM1	PHOSPHATIDYLINOSITOL MEMBRANE-ASSOCIATED	NM_001008369	A_43_P20968	-1.42327	0.000416493	GE17219	-0.0822246	0.6232
PTPN23	PROTEIN TYROSINE PHOSPHATASE, NON-RECEPTOR TYPE 23	NM_057204	A_42_P625235	0.567752	0.00680764	GE13296	0.213876	0.3929
SEC31L1	SEC31-LIKE 1 (S. CEREVISIAE)	NM_033021	A_42_P525283	0.705875	0.0014383	GE1173632	-0.349052	0.2053
PITPNM1	PHOSPHATIDYLINOSITOL MEMBRANE-ASSOCIATED	NM_001008369	A_43_P20968	-1.42327	0.000416493	GE1233678	-0.0234164	0.8882
TH	TYROSINE HYDROXYLASE	NM_012740	A_43_P11541	-1.05832	0.000834427	GE1254069	0.239887	0.2753
EIF4B	EUKARYOTIC TRANSLATION INITIATION FACTOR 4B	NM_001008324	A_42_P771848	0.599026	0.00308186	GE1121238	-0.180659	0.5946
NA	NA	NM_001077428	A_42_P609493	0.358549	0.00556266	GE1143292	-0.183769	0.3653
TACC2	TRANSFORMING ACIDIC COILED COIL 2	NM_001004415	A_42_P810613	0.519987	0.00156358	GE1255290	-0.118884	0.6038
CANT1	CALCIUM ACTIVATED NUCLEOTIDASE 1	NM_144754	A_43_P13397	-0.396302	0.000517418	GE19560	0.0565835	0.6862
PADI1	PEPTIDYL ARGININE DEIMINASE, TYPE I	NM_019332	A_43_P12026	0.577531	0.000884892	GE20665	-0.975113	0.029
DNMT3A	DNA METHYLTRANSFERASE 3A	NM_001003957	A_43_P23195	-0.377832	0.00585121	GE1131608	0.262433	0.186
NA	NA	NM_053491	A_42_P599062	-1.02798	0.000118337	GE15715	0.41738	0.0984
GRAMD3	SIMILAR TO RIKEN CDNA 9130427A09	NM_001014011	A_43_P21355	-0.844231	0.00323208	GE14971	0.138159	0.4407
VAC14	VACUOLE 14 PROTEIN (S. CEREVISIAE)	NM_177930	A_42_P608488	-0.64771	0.00589711	GE1169539	0.00619029	0.975
PEPD	PEPTIDASE D (MAPPED)	NM_001009641	A_43_P20408	0.416283	0.00692144	GE1219061	NA	NA
NTF3	NEUROTROPHIN 3	NM_031073	A_43_P12501	-1.24807	0.000199704	GE19696	NA	NA
AZI2	5-AZACYTIDINE INDUCED GENE 2	NM_001025705	A_43_P14849	0.759207	0.00335237	GE1155588	NA	NA
CYP2C7	CYTOCHROME P450, FAMILY 2, SUBFAMILY C, POLYPEPTIDE 7	NM_017158	A_43_P13939	0.469866	0.00188873	GE20382	NA	NA
ARF4	ADP-RIBOSYLATION FACTOR 4	NM_024151	A_43_P12406	0.633893	0.00677148	GE1178128	NA	NA
LRRC8D	LEUCINE-RICH REPEAT-CONTAINING 5	NM_001008338	A_42_P636002	0.656686	0.000597589	GE1180450	-0.100979	0.4792
ANXA7	ANNEXIN A7	NM_130416	A_43_P13114	0.476127	0.00566853	GE1233158	NA	NA
RPS9	RIBOSOMAL PROTEIN S9	NM_031108	A_43_P12515	-0.602878	0.00468344	GE1250807	-0.104387	0.7053
NA	NA	NM_001047103	A_43_P10137	-0.801126	0.000186262	GE1141852	NA	NA
MGC114388	SIMILAR TO RIKEN CDNA 4921520P21	NM_001025288	A_43_P23274	0.840336	0.000239193	GE1223538	NA	NA
TPM3	TROPOMYOSIN 3, GAMMA	NM_057208	A_43_P13062	-0.626677	0.00030566	GE1257707	0.00432161	0.9777
ZPBP	ZONA PELLUCIDA BINDING PROTEIN	NM_001025139	A_43_P23370	-1.1307	0.000161148	GE1292128	NA	NA
NA	NA	NM_001047099	A_43_P19830	-1.3059	5.37533e-05	GE16404	0.0896337	0.673
UBQLN1	UBIQUILIN 1	NM_053747	A_43_P12922	0.799346	0.000560008	GE13883	NA	NA
NA	NA	NM_001077645	A_43_P17822	-0.479623	0.00016106	GE22126	NA	NA
RNF135	RING FINGER PROTEIN 135	NM_001012010	A_43_P20056	-0.79214	0.00181449	GE1289302	0.0931545	0.657
ARF3	ADP-RIBOSYLATION FACTOR 3	NM_080904	A_42_P690520	0.706775	0.0075414	GE1245107	-0.276835	0.1063
CMKLR1	CHEMOKINE-LIKE RECEPTOR 1	NM_022218	A_43_P12169	-1.35187	0.000281626	GE1180503	NA	NA
CHRNE	CHOLINERGIC RECEPTOR, NICOTINIC, EPSILON POLYPEPTIDE	NM_017194	A_42_P540743	0.562369	0.00522474	GE20411	NA	NA
RNASEH2A	RIBONUCLEASE H2, LARGE SUBUNIT	NM_001013234	A_43_P10088	-0.498932	0.00319831	GE1285314	-0.0519973	0.7559
ARC	ACTIVITY REGULATED CYTOSKELETAL-ASSOCIATED PROTEIN	NM_019361	A_43_P12040	-0.449823	0.00136907	GE20683	NA	NA
RNF135	RING FINGER PROTEIN 135	NM_001012010	A_43_P20056	-0.79214	0.00181449	GE14568	0.0430645	0.7573
NOS2	NITRIC OXIDE SYNTHASE 2, INDUCIBLE	NM_012611	A_43_P11486	-0.788991	0.00446401	GE19861	NA	NA
NG23	NG23 PROTEIN	NM_001004069	A_43_P22336	-0.501116	0.00539421	GE17802	NA	NA
NTRK2	NEUROTROPHIC TYROSINE KINASE, RECEPTOR, TYPE 2	NM_012731	A_43_P10774	0.621022	0.000226452	GE1114311	NA	NA
LRRC50	SIMILAR TO RIKEN CDNA 4930457P18	NM_001014154	A_43_P19563	-0.836357	0.000176561	GE1105900	NA	NA
HNT	NEUROTRIMIN	NM_017354	A_42_P840836	-0.709625	0.00137164	GE20522	-0.725947	0.0005
FOXE1	FORKHEAD BOX E1 (THYROID TRANSCRIPTION FACTOR 2)	NM_138909	A_43_P13335	-1.97403	2.98724e-05	GE21194	NA	NA
GNMT	GLYCINE N-METHYLTRANSFERASE	NM_017084	A_42_P502960	-0.600289	0.00119274	GE20329	NA	NA
VDR	VITAMIN D RECEPTOR	NM_017058	A_43_P11799	-1.06544	0.000116196	GE20308	NA	NA
KCNIP2	KV CHANNEL-INTERACTING PROTEIN 2	NM_001033961	NA	NA	NA	GE13527	-0.803897	0.0001
ATP5A1	ATP SYNTHASE, H+ TRANSPORTING, MITOCHONDRIAL F1 COMPLEX, ALPHA SUBUNIT, ISOFORM 1	NM_023093	A_42_P606605	0.62617	0.0064577	GE19582	0.0480967	0.7063
GSTA3	GLUTATHIONE S-TRANSFERASE A3	NM_001009920	A_42_P492022	-0.808487	0.004293	GE1125325	NA	NA
CRK	V-CRK SARCOMA VIRUS CT10 ONCOGENE HOMOLOG (AVIAN)	NM_019302	A_43_P12013	-0.584227	0.000296944	GE12973	NA	NA
MYOCD	TRANSCRIPTION FACTOR MYOCARDIN	NM_182667	A_43_P22961	-0.503238	0.00156653	GE1246105	NA	NA
PRLR	PROLACTIN RECEPTOR	NM_001034111	A_42_P619445	-0.675443	0.00260679	GE15061	NA	NA
PGSG	PROTEOGLYCAN PEPTIDE CORE PROTEIN	NM_020074	A_42_P559737	0.626196	0.00564161	GE20710	NA	NA
NA	NA	NM_001047099	A_43_P19830	-1.3059	5.37533e-05	GE1157433	-0.0764324	0.6859
LRRC50	SIMILAR TO RIKEN CDNA 4930457P18	NM_001014154	A_43_P19563	-0.836357	0.000176561	GE1257367	NA	NA
CP	CERULOPLASMIN	NM_012532	A_43_P11448	-0.252157	0.211797	GE19806	1.2719	7.39e-05
TUBA8	SIMILAR TO TUBULIN ALPHA-8 CHAIN (ALPHA-TUBULIN 8)	NM_001024339	A_42_P656703	-0.958669	0.000149472	GE1103252	NA	NA
MDH1	MALATE DEHYDROGENASE 1, NAD (SOLUBLE)	NM_033235	A_43_P12734	0.662539	0.0034588	GE17977	-0.133052	0.4228
NA	NA	NM_001047902	A_43_P16915	0.404446	0.00599863	GE1151576	NA	NA
RAB4B	RAB4B, MEMBER RAS ONCOGENE FAMILY	NM_017355	A_42_P634910	0.506561	0.000266726	GE1288093	NA	NA
DYNC2LI1	SIMILAR TO DYNEIN 2 LIGHT INTERMEDIATE CHAIN	NM_001013940	A_43_P23209	0.505972	0.00225347	GE17775	NA	NA
CNNM2	CYCLIN M2	NM_001011942	A_43_P21970	0.367676	0.00135293	GE1122380	NA	NA
LIPC	LIPASE, HEPATIC	NM_012597	A_42_P831978	-1.14134	0.000165437	GE19850	NA	NA
LOC498225	SIMILAR TO LIGATIN	NM_001017489	A_42_P755546	0.572728	0.00166325	GE1240436	NA	NA
GNA12	GUANINE NUCLEOTIDE BINDING PROTEIN, ALPHA 12	NM_031034	A_43_P15312	0.461145	0.00311779	GE13751	0.29725	0.2001
GAST	GASTRIN	NM_012849	A_43_P11585	-1.24483	0.000365845	GE1104619	NA	NA
ODZ2	NEURESTIN	NM_020088	A_43_P12062	-1.14903	0.000337159	GE1217075	NA	NA
THRAP3	THYROID HORMONE RECEPTOR ASSOCIATED PROTEIN 3	NM_001009693	A_42_P722536	0.473093	0.00626293	GE17565	NA	NA
MME	MEMBRANE METALLO ENDOPEPTIDASE	NM_012608	A_43_P11484	0.415919	0.000782563	GE19858	NA	NA
AQP2	AQUAPORIN 2	NM_012909	A_42_P763077	-1.00117	0.000236147	GE21416	NA	NA
AGPAT1	1-ACYLGLYCEROL-3-PHOSPHATE O-ACYLTRANSFERASE 1	NM_212458	A_43_P10000	-0.425656	0.00254848	GE1295396	NA	NA
PRL4A1	PROLACTIN-LIKE PROTEIN A	NM_017036	A_43_P14880	-0.735866	5.05082e-05	GE20293	NA	NA
UBE2V2	UBIQUITIN-CONJUGATING ENZYME E2 VARIANT 2	NM_183052	A_43_P10360	0.792015	0.00136902	GE1289763	NA	NA
RNASEH2A	RIBONUCLEASE H2, LARGE SUBUNIT	NM_001013234	A_43_P10088	-0.498932	0.00319831	GE1299996	NA	NA
PRLR	PROLACTIN RECEPTOR	NM_001034111	A_42_P619445	-0.675443	0.00260679	GE1143706	NA	NA
PRLR	PROLACTIN RECEPTOR	NM_001034111	A_42_P619445	-0.675443	0.00260679	GE1208271	NA	NA
ACPL2	SIMILAR TO RIKEN CDNA C130099A20	NM_001007710	A_43_P10119	-0.968617	4.74202e-05	GE1225221	NA	NA
PRLR	PROLACTIN RECEPTOR	NM_001034111	A_42_P619445	-0.675443	0.00260679	GE1114152	NA	NA
CCT5	CHAPERONIN SUBUNIT 5 (EPSILON)	NM_001004078	A_43_P11372	0.665105	0.00246127	GE1296814	NA	NA
FGF1	FIBROBLAST GROWTH FACTOR 1	NM_012846	A_43_P15251	-0.811714	0.00230193	GE20006	NA	NA
ANK	PROGRESSIVE ANKYLOSIS HOMOLOG (MOUSE)	NM_053714	A_43_P12909	0.728135	0.00149967	GE1260606	NA	NA
PDE4A	PHOSPHODIESTERASE 4A	NM_013101	A_42_P480932	0.361802	0.00486742	GE1265697	NA	NA
GNA12	GUANINE NUCLEOTIDE BINDING PROTEIN, ALPHA 12	NM_031034	A_43_P15312	0.461145	0.00311779	GE1283406	-0.0414171	0.8135
PGK1	PHOSPHOGLYCERATE KINASE 1	NM_053291	A_43_P12754	-0.651861	0.00277395	GE1319680	NA	NA
AXL	AXL RECEPTOR TYROSINE KINASE (PREDICTED)	NM_001013147	A_43_P18268	0.714061	0.000604494	GE21354	NA	NA
RXRA	RETINOID X RECEPTOR ALPHA	NM_012805	A_43_P11571	0.460653	0.000961656	GE21675	NA	NA
PPP2R1B	PROTEIN PHOSPHATASE 2 (FORMERLY 2A), REGULATORY SUBUNIT A (PR 65), BETA ISOFORM	NM_001025418	A_42_P501972	0.411855	0.00544784	GE1184036	NA	NA
BRD2	BROMODOMAIN-CONTAINING 2	NM_212495	A_43_P16514	-0.542118	0.00386127	GE1158690	NA	NA
BASP1	BRAIN ABUNDANT, MEMBRANE ATTACHED SIGNAL PROTEIN 1	NM_022300	A_43_P12208	-0.624564	0.00485821	GE1197450	-0.0768889	0.5666
GULO	L-GULONOLACTONE OXIDASE	NM_022220	A_43_P15556	-0.43394	0.00754774	GE1287890	NA	NA
ARF6	ADP-RIBOSYLATION FACTOR 6	NM_024152	A_43_P12407	0.74719	0.000192075	GE1113354	-0.0499049	0.724
RPL24	RIBOSOMAL PROTEIN L24	NM_022515	A_42_P791328	-0.689554	0.00019365	GE1182308	NA	NA
YWHAE	TYROSINE 3-MONOOXYGENASE/TRYPTOPHAN 5-MONOOXYGENASE ACTIVATION PROTEIN, EPSILON POLYPEPTIDE	NM_031603	A_42_P655044	0.698489	0.00716219	GE21848	NA	NA
IDH3A	ISOCITRATE DEHYDROGENASE 3 (NAD+) ALPHA	NM_053638	A_43_P12879	0.438255	0.00412493	GE17576	NA	NA
RNF44	RING FINGER PROTEIN 44	NM_001024795	A_42_P628013	0.41009	0.00409046	GE1198690	NA	NA
RG9MTD1	RNA (GUANINE-9-) METHYLTRANSFERASE DOMAIN CONTAINING 1	NM_001008337	A_43_P18667	-0.722706	0.000469842	GE1146669	-0.401254	0.035
SPDY1	SPEEDY HOMOLOG 1 (DROSOPHILA)	NM_138855	A_42_P529780	0.570536	0.00489137	GE1296811	NA	NA
CASKIN1	CASK-INTERACTING PROTEIN 1	NM_080690	A_42_P768530	0.41452	0.00274053	GE1156220	NA	NA
OPRK1	OPIOID RECEPTOR, KAPPA 1	NM_017167	A_43_P15269	0.517581	0.00210297	GE21578	NA	NA
TRIM35	TRIPARTITE MOTIF-CONTAINING 35	NM_001025142	A_42_P494659	0.720386	0.00278458	GE1227244	NA	NA
LOC362304	SIMILAR TO ORC5-RELATED PROTEIN	NM_001014186	A_42_P831513	0.496593	0.000745487	GE1209704	NA	NA
MKI67IP	SPERMATOGENESIS-RELATED PROTEIN (SRP)	NM_139186	A_43_P13372	0.3836	0.00216405	GE1145798	NA	NA
ARF3	ADP-RIBOSYLATION FACTOR 3	NM_080904	A_42_P690520	0.706775	0.0075414	GE19608	-0.163106	0.5358
ARF1	ADP-RIBOSYLATION FACTOR 1	NM_022518	A_43_P12235	1.05699	0.00763532	GE14115	NA	NA
TNK2	TYROSINE KINASE, NON-RECEPTOR, 2	NM_001008336	A_43_P20807	-0.751505	0.00316841	GE1241184	NA	NA
TPM1	TROPOMYOSIN 1, ALPHA	NM_001034068	A_42_P523424	0.621115	0.00235376	GE17114	NA	NA
AKAP1	A KINASE (PRKA) ANCHOR PROTEIN 1	NM_053665	A_42_P771203	0.833005	0.000236817	GE21380	NA	NA
THRAP3	THYROID HORMONE RECEPTOR ASSOCIATED PROTEIN 3	NM_001009693	A_42_P722536	0.473093	0.00626293	GE1306319	NA	NA
TAF9_PS	TAF9 RNA POLYMERASE II, TATA BOX BINDING PROTEIN (TBP)-ASSOCIATED FACTOR PSEUDOGENE	NM_001012463	A_43_P10802	0.720493	0.00285533	GE1238369	NA	NA
MOAP1	MODULATOR OF APOPTOSIS 1	NM_001013101	A_42_P749154	0.710799	0.00584989	GE1105117	NA	NA
PRLR	PROLACTIN RECEPTOR	NM_001034111	A_42_P619445	-0.675443	0.00260679	GE15839	NA	NA
RGN	REGUCALCIN	NM_031546	A_42_P508471	0.511866	3.59369e-05	GE21281	NA	NA
DR1	DOWN-REGULATOR OF TRANSCRIPTION 1	NM_001011914	A_42_P703701	0.652696	0.000545519	GE1162256	NA	NA
ARL2BP	ADP-RIBOSYLATION FACTOR-LIKE 2 BINDING PROTEIN	NM_001024906	A_42_P671971	0.504275	0.0047537	GE17525	NA	NA
SF3B4	SPLICING FACTOR 3B, SUBUNIT 4	NM_001011951	A_42_P828934	0.310805	0.00607984	GE1242474	NA	NA
PRLR	PROLACTIN RECEPTOR	NM_001034111	A_42_P619445	-0.675443	0.00260679	GE1143868	NA	NA
PEPD	PEPTIDASE D (MAPPED)	NM_001009641	A_43_P20408	0.416283	0.00692144	GE1131539	NA	NA
ST7L	SUPPRESSION OF TUMORIGENICITY 7-LIKE	NM_001007639	A_43_P17864	0.602532	0.00633908	GE1133238	NA	NA
HNT	NEUROTRIMIN	NM_017354	A_42_P840836	-0.709625	0.00137164	GE1140942	-0.478145	0.0572
SYCP3	SYNAPTONEMAL COMPLEX PROTEIN 3	NM_013041	A_42_P662939	0.430653	0.0031317	GE20132	NA	NA
ADH4	ALCOHOL DEHYDROGENASE 4 (CLASS II), PI POLYPEPTIDE	NM_017270	A_43_P14287	0.469145	0.000247585	GE20463	NA	NA
NA	NA	NM_001047874	A_42_P751368	0.624293	0.000536213	GE1288447	NA	NA
PRLR	PROLACTIN RECEPTOR	NM_001034111	A_42_P619445	-0.675443	0.00260679	GE1199366	NA	NA
RTN1	RETICULON 1	NM_053865	A_42_P524577	0.916916	3.85769e-07	GE1181728	NA	NA
MCPT2	MAST CELL PEPTIDASE 2	NM_172044	A_42_P492910	0.55638	0.000114698	GE1125357	NA	NA
LRP16	LRP16 PROTEIN	NM_139337	A_43_P15369	-1.4411	3.56871e-06	GE1150729	NA	NA
RPS15A	RIBOSOMAL PROTEIN S15A	NM_053982	A_43_P13007	-0.795661	0.000246901	GE1271709	NA	NA
CYP11A1	CYTOCHROME P450, FAMILY 11, SUBFAMILY A, POLYPEPTIDE 1	NM_017286	A_43_P11896	-0.732215	0.0067551	GE20476	NA	NA
OPRK1	OPIOID RECEPTOR, KAPPA 1	NM_017167	A_43_P15269	0.517581	0.00210297	GE1220209	NA	NA
CATNA1	CATENIN (CADHERIN-ASSOCIATED PROTEIN), ALPHA 1, 102KDA	NM_001007145	A_43_P19010	0.714674	5.4919e-05	GE1168701	NA	NA
UGT1A7	UDP GLYCOSYLTRANSFERASE 1 FAMILY, POLYPEPTIDE A7	NM_130407	A_43_P13108	-0.577051	0.00306424	GE1256267	NA	NA
PRLR	PROLACTIN RECEPTOR	NM_001034111	A_42_P619445	-0.675443	0.00260679	GE21797	NA	NA
CTSW	CATHEPSIN W	NM_001024242	A_43_P14585	-0.729748	0.00722996	GE1269897	NA	NA
DRG1	DEVELOPMENTALLY REGULATED GTP BINDING PROTEIN 1	NM_001009685	A_43_P20941	0.46882	0.00573122	GE1245505	NA	NA
EDNRA	ENDOTHELIN RECEPTOR TYPE A	NM_012550	A_43_P11459	-0.502116	0.00524997	GE19813	NA	NA
KPNA4	KARYOPHERIN (IMPORTIN) ALPHA 4	NM_001014793	A_43_P20282	0.398806	0.000257093	GE1228433	NA	NA
RGD1310953	SIMILAR TO RIKEN CDNA 2610510J17	NM_001008366	A_43_P19441	0.482103	0.000268638	GE1190987	NA	NA
SCT	SECRETIN	NM_022670	A_43_P15427	0.494386	0.00554455	GE1290911	NA	NA
GTF2I	GENERAL TRANSCRIPTION FACTOR II I	NM_001001512	A_43_P16411	0.633715	0.000344711	GE1182158	NA	NA
SERPINA1	SERINE (OR CYSTEINE) PROTEINASE INHIBITOR, CLADE A (ALPHA-1 ANTIPROTEINASE, ANTITRYPSIN), MEMBER 1	NM_022519	A_43_P15291	-1.39029	0.000142523	GE1303133	NA	NA
HNT	NEUROTRIMIN	NM_017354	A_42_P840836	-0.709625	0.00137164	GE1102919	-0.131945	0.5017
GALNT11	UDP-N-ACETYL-ALPHA-D-GALACTOSAMINE:POLYPEPTIDE N-ACETYLGALACTOSAMINYLTRANSFERASE 11 (GALNAC-T11)	NM_199393	A_42_P535743	0.724614	0.000116505	GE1255840	0.23585	0.3328
CNNM2	CYCLIN M2	NM_001011942	A_43_P21970	0.367676	0.00135293	GE1275448	NA	NA
AREG	AMPHIREGULIN	NM_017123	A_42_P791677	0.459515	0.004031	GE20356	NA	NA
SRPK3	SERINE/THREONINE KINASE 23	NM_184045	A_43_P23091	-1.23106	0.000310031	GE1148991	NA	NA
ATP1B2	ATPASE, NA+/K+ TRANSPORTING, BETA 2 POLYPEPTIDE	NM_012507	A_43_P11439	0.40946	0.00746657	GE1206039	NA	NA
NA	NA	NM_001079936	A_42_P795009	0.849961	5.22923e-05	GE1253208	NA	NA
CATNA1	CATENIN (CADHERIN-ASSOCIATED PROTEIN), ALPHA 1, 102KDA	NM_001007145	A_42_P669549	0.859235	0.0023997	GE1168701	NA	NA
ACSL1	ACYL-COA SYNTHETASE LONG-CHAIN FAMILY MEMBER 1	NM_012820	A_43_P14632	1.13162	1.17242e-05	GE1289301	NA	NA
TPM3	TROPOMYOSIN 3, GAMMA	NM_057208	A_43_P13062	-0.626677	0.00030566	GE1175093	-0.0727862	0.7485
PGK1	PHOSPHOGLYCERATE KINASE 1	NM_053291	A_43_P12754	-0.651861	0.00277395	GE1319773	NA	NA
PFKFB2	6-PHOSPHOFRUCTO-2-KINASE/FRUCTOSE-2,6-BIPHOSPHATASE 2	NM_001033964	A_42_P711274	-0.952919	0.000153105	GE21713	NA	NA
MAPK1	MITOGEN ACTIVATED PROTEIN KINASE 1	NM_053842	A_43_P12954	0.852411	0.000139408	GE21828	NA	NA
PFN2	PROFILIN 2	NM_030873	A_42_P581863	0.516746	0.00650265	GE1293725	NA	NA
PRL4A1	PROLACTIN-LIKE PROTEIN A	NM_017036	A_43_P14880	-0.735866	5.05082e-05	GE1179902	NA	NA
RGD1305755	SIMILAR TO RIKEN CDNA 5033406L14 (PREDICTED)	NM_001039336	NA	NA	NA	GE1180686	-1.07309	0.0001
MAP2K1	MITOGEN ACTIVATED PROTEIN KINASE KINASE 1	NM_031643	A_42_P638191	0.795624	0.000877135	GE1282407	-0.0424568	0.7863
NA	NA	NM_001047877	A_43_P20412	-0.521415	0.00137683	GE1258331	NA	NA
CMBP	CYTOMATRIX PROTEIN P110	NM_170787	NA	NA	NA	GE1188274	3.3374	9.99e-06
MAP2K1	MITOGEN ACTIVATED PROTEIN KINASE KINASE 1	NM_031643	A_42_P638191	0.795624	0.000877135	GE1132798	NA	NA
AZI2	5-AZACYTIDINE INDUCED GENE 2	NM_001025705	A_42_P524676	0.45954	8.85239e-05	GE1231157	NA	NA
PICALM	PHOSPHATIDYLINOSITOL BINDING CLATHRIN ASSEMBLY PROTEIN	NM_053554	A_43_P12852	0.706504	0.000386657	GE1268907	NA	NA
GLUD1	GLUTAMATE DEHYDROGENASE 1	NM_012570	A_43_P14157	0.781013	0.00468297	GE19830	0.0346383	0.8555
DNAJA1	DNAJ-LIKE PROTEIN	NM_022934	A_43_P12340	0.654557	0.00613365	GE1297033	NA	NA
TM9SF2	TRANSMEMBRANE 9 SUPERFAMILY MEMBER 2	NM_001005554	A_42_P717406	0.506936	0.00401683	GE1140831	NA	NA
YWHAE	TYROSINE 3-MONOOXYGENASE/TRYPTOPHAN 5-MONOOXYGENASE ACTIVATION PROTEIN, EPSILON POLYPEPTIDE	NM_031603	A_42_P655044	0.698489	0.00716219	GE1257210	NA	NA
EXOC2	RSEC5 PROTEIN	NM_134414	A_42_P770458	0.65352	0.00390314	GE1185472	NA	NA
FN1	FIBRONECTIN 1	NM_019143	A_42_P774977	0.762224	0.000128456	GE20544	NA	NA
BPGM	2,3-BISPHOSPHOGLYCERATE MUTASE	NM_199382	A_43_P17008	0.549408	0.000553683	GE17258	-0.0319461	0.8239
CAPG	CAPPING PROTEIN (ACTIN FILAMENT), GELSOLIN-LIKE	NM_001013086	NA	NA	NA	GE17580	1.17722	0.0002
IRF1	INTERFERON REGULATORY FACTOR 1	NM_012591	A_43_P11477	0.739356	7.85746e-05	GE19845	0.0920721	0.5972
ARHGEF1	RHO GUANINE NUCLEOTIDE EXCHANGE FACTOR (GEF) 1	NM_021694	A_43_P12106	-0.599563	0.000534696	GE21528	NA	NA
KPNA3	KARYOPHERIN (IMPORTIN) ALPHA 3	NM_001014792	A_43_P10513	-0.439937	0.00534566	GE1218039	NA	NA
NOSTRIN	NITRIC OXIDE SYNTHASE TRAFFICKER	NM_001024260	A_42_P461564	0.68045	0.00135551	GE1109064	NA	NA
WARS	TRYPTOPHANYL-TRNA SYNTHETASE	NM_001013170	A_43_P10163	-0.605581	0.000123078	GE1281159	NA	NA
DNCIC2	DYNEIN, CYTOPLASMIC, INTERMEDIATE CHAIN 2	NM_053880	A_43_P12969	0.446042	0.00702444	GE1277260	NA	NA
PGRMC1	PROGESTERONE RECEPTOR MEMBRANE COMPONENT 1	NM_021766	A_42_P674786	0.525014	0.004822	GE1300019	NA	NA
RPL6	RIBOSOMAL PROTEIN L6	NM_053971	A_42_P669501	-0.40819	0.00194561	GE22199	NA	NA
MSL31	SIMILAR TO MALE-SPECIFIC LETHAL 3-LIKE 1 (MSL3-LIKE 1) (MALE-SPECIFIC LETHAL-3 HOMOLOG 1)	NM_001014111	A_43_P10986	0.628242	0.00180442	GE1234285	NA	NA
PLIN	PERILIPIN	NM_013094	A_43_P11708	0.486496	0.00356931	GE20170	NA	NA
PLIN	PERILIPIN	NM_013094	A_43_P11708	0.486496	0.00356931	GE1163233	NA	NA
NA	NA	NM_053491	A_42_P599062	-1.02798	0.000118337	GE21824	NA	NA
REG1	REGENERATING ISLET-DERIVED 1	NM_012641	A_43_P11500	-0.365244	0.00244886	GE19877	NA	NA
CASKIN1	CASK-INTERACTING PROTEIN 1	NM_080690	A_43_P13077	-1.65215	3.55615e-06	GE1156220	NA	NA
MTAP1A	MICROTUBULE-ASSOCIATED PROTEIN 1 A	NM_030995	A_43_P15308	-1.00884	5.12928e-06	GE19750	NA	NA
CPT2	CARNITINE PALMITOYLTRANSFERASE 2	NM_012930	A_42_P601920	0.53641	0.000671832	GE1180423	NA	NA
LIPC	LIPASE, HEPATIC	NM_012597	A_42_P831978	-1.14134	0.000165437	GE21755	NA	NA
MESDC2	MESODERM DEVELOPMENT CANDIATE 2	NM_001008345	A_43_P21324	0.730863	0.00101467	GE14384	NA	NA
SCN2B	SODIUM CHANNEL, VOLTAGE-GATED, TYPE II, BETA	NM_012877	A_43_P11599	-0.545977	0.0033668	GE21964	NA	NA
PDIA5	PROTEIN DISULFIDE ISOMERASE-ASSOCIATED 5	NM_001014125	A_42_P581686	-0.465761	0.00389738	GE13800	0.391988	0.1137
PGK1	PHOSPHOGLYCERATE KINASE 1	NM_053291	A_43_P12754	-0.651861	0.00277395	GE1319716	NA	NA
PDIA5	PROTEIN DISULFIDE ISOMERASE-ASSOCIATED 5	NM_001014125	A_42_P581686	-0.465761	0.00389738	GE1223401	NA	NA
HNRPC	HETEROGENEOUS NUCLEAR RIBONUCLEOPROTEIN C	NM_001025633	A_42_P547560	0.637882	0.000486236	GE1286377	NA	NA
GDF15	GROWTH DIFFERENTIATION FACTOR 15	NM_019216	A_43_P15537	-0.731322	2.41858e-06	GE20590	NA	NA
BCL10	B-CELL CLL/LYMPHOMA 10	NM_031328	A_42_P508784	0.589724	0.000685396	GE1264994	NA	NA
ADPRH	ADP-RIBOSYLARGININE HYDROLASE	NM_183325	A_42_P545163	0.566738	0.00728664	GE1242299	0.0900404	0.5177
CATNA1	CATENIN (CADHERIN-ASSOCIATED PROTEIN), ALPHA 1, 102KDA	NM_001007145	A_42_P669549	0.859235	0.0023997	GE1273318	NA	NA
CMA1	CHYMASE 1, MAST CELL	NM_013092	A_42_P514868	-0.58909	0.0003098	GE20169	NA	NA
FCER2A	FC RECEPTOR, IGE, LOW AFFINITY II, ALPHA POLYPEPTIDE	NM_001033924	A_42_P577136	-0.484143	0.00037508	GE21137	NA	NA
PGK1	PHOSPHOGLYCERATE KINASE 1	NM_053291	A_43_P12754	-0.651861	0.00277395	GE1319705	NA	NA
MME	MEMBRANE METALLO ENDOPEPTIDASE	NM_012608	A_43_P11484	0.415919	0.000782563	GE1141399	NA	NA
GDNF	GLIAL CELL LINE DERIVED NEUROTROPHIC FACTOR	NM_019139	A_43_P11945	-0.28122	0.00205147	GE22204	NA	NA
SERPINB7	SERINE (OR CYSTEINE) PROTEINASE INHIBITOR, CLADE B, MEMBER 7	NM_130404	A_43_P13105	-1.03618	0.000564534	GE1305924	NA	NA
ARF3	ADP-RIBOSYLATION FACTOR 3	NM_080904	A_42_P690520	0.706775	0.0075414	GE1196441	NA	NA
RHOH	RAS HOMOLOG GENE FAMILY, MEMBER H	NM_001013430	A_43_P23152	-0.455784	0.00441658	GE1224080	NA	NA
PSMA1	PROTEASOME (PROSOME, MACROPAIN) SUBUNIT, ALPHA TYPE 1	NM_017278	A_42_P743301	0.637536	0.00305967	GE20468	NA	NA
NA	NA	NM_001077644	A_43_P16215	-0.701134	0.00355974	GE1230806	NA	NA
LIF	LEUKEMIA INHIBITORY FACTOR	NM_022196	A_43_P12157	-0.564505	2.10831e-05	GE1266257	0.0321008	0.8557
LCP2	LYMPHOCYTE CYTOSOLIC PROTEIN 2	NM_130421	A_42_P671389	0.549197	0.00134806	GE1134521	NA	NA
HSFY1	HEAT SHOCK TRANSCRIPTION FACTOR, Y-LINKED 1	NM_001012132	A_43_P22398	0.613633	0.00221512	GE1152326	NA	NA
PFKFB2	6-PHOSPHOFRUCTO-2-KINASE/FRUCTOSE-2,6-BIPHOSPHATASE 2	NM_001033964	A_42_P711274	-0.952919	0.000153105	GE1300254	NA	NA
RGD1304952	SIMILAR TO RIKEN CDNA C530028O21 GENE	NM_001014059	A_43_P18986	-1.07338	0.000788293	GE19411	NA	NA
NTRK2	NEUROTROPHIC TYROSINE KINASE, RECEPTOR, TYPE 2	NM_012731	A_43_P10774	0.621022	0.000226452	GE1178009	NA	NA
CYP8B1	CYTOCHROME P450, FAMILY 8, SUBFAMILY B, POLYPEPTIDE 1	NM_031241	A_42_P473074	-0.461409	0.000352671	GE21246	NA	NA
LOC365601	SIMILAR TO AUTOPHAGY 5-LIKE	NM_001014250	A_42_P630791	0.501714	0.00216754	GE1254421	NA	NA
FN1	FIBRONECTIN 1	NM_019143	A_42_P774977	0.762224	0.000128456	GE1166578	NA	NA
PPP3R2	PROTEIN PHOSPHATASE 3, REGULATORY SUBUNIT B, ALPHA ISOFORM (CALCINEURIN B, TYPE II)	NM_021701	A_42_P626467	0.29207	0.00640875	GE21546	NA	NA
ATP6V0C	ATPASE, H+ TRANSPORTING, V0 SUBUNIT C	NM_130823	A_42_P545209	0.586085	0.00627777	GE1212304	NA	NA
IFT74	COILED-COIL DOMAIN CONTAINING 2	NM_001007001	A_42_P771533	0.705331	0.000214497	GE1273809	NA	NA
TTLL1	TUBULIN TYROSINE LIGASE-LIKE 1	NM_001012200	A_42_P633838	0.48332	0.00100609	GE1153296	NA	NA
YWHAE	TYROSINE 3-MONOOXYGENASE/TRYPTOPHAN 5-MONOOXYGENASE ACTIVATION PROTEIN, EPSILON POLYPEPTIDE	NM_031603	A_42_P655044	0.698489	0.00716219	GE1255440	NA	NA
CIRH1A	CIRRHOSIS, AUTOSOMAL RECESSIVE 1A (CIRHIN)	NM_001009640	A_42_P704824	0.589572	2.06716e-05	GE1215581	NA	NA
HNT	NEUROTRIMIN	NM_017354	A_42_P840836	-0.709625	0.00137164	GE1167223	-0.115285	0.6518
MSH5	MUTS HOMOLOG 5	NM_212536	A_43_P23342	-1.13344	0.000302855	GE1305570	NA	NA
CREBBP	CREB BINDING PROTEIN	NM_133381	A_42_P558269	0.464262	0.00215034	GE1128059	NA	NA
YWHAE	TYROSINE 3-MONOOXYGENASE/TRYPTOPHAN 5-MONOOXYGENASE ACTIVATION PROTEIN, EPSILON POLYPEPTIDE	NM_031603	A_42_P655044	0.698489	0.00716219	GE1211045	NA	NA
EPN2	EPSIN 2	NM_001033914	A_43_P12133	-1.02106	1.64389e-05	GE1160276	NA	NA
CREBBP	CREB BINDING PROTEIN	NM_133381	A_42_P842722	-0.65488	0.00174532	GE1128059	NA	NA
NA	NA	NM_001047099	A_43_P19830	-1.3059	5.37533e-05	GE13999	NA	NA
ARF4	ADP-RIBOSYLATION FACTOR 4	NM_024151	A_43_P12406	0.633893	0.00677148	GE1229558	NA	NA
YWHAG	TYROSINE 3-MONOOXGENASE/TRYPTOPHAN 5-MONOOXGENASE ACTIVATION PROTEIN, GAMMA POLYPEPTIDE	NM_019376	A_43_P14134	0.609358	0.000489005	GE21579	0.0159257	0.9119
GAB2	GROWTH FACTOR RECEPTOR BOUND PROTEIN 2-ASSOCIATED PROTEIN 2	NM_053417	A_42_P529077	-0.444989	0.00243404	GE1101119	NA	NA
AZI2	5-AZACYTIDINE INDUCED GENE 2	NM_001025705	A_43_P14849	0.759207	0.00335237	GE1231157	NA	NA
EDNRA	ENDOTHELIN RECEPTOR TYPE A	NM_012550	A_43_P11459	-0.502116	0.00524997	GE21822	NA	NA
TMEM106B	SIMILAR TO RIKEN CDNA 2310036D22	NM_001004267	A_43_P17169	0.492738	0.00237684	GE16821	NA	NA
IRF1	INTERFERON REGULATORY FACTOR 1	NM_012591	A_43_P11477	0.739356	7.85746e-05	GE21798	0.171591	0.3732
ATP5F1	ATP SYNTHASE, H+ TRANSPORTING, MITOCHONDRIAL F0 COMPLEX, SUBUNIT B, ISOFORM 1	NM_134365	A_42_P743310	0.640953	0.000120148	GE19697	-0.0256175	0.8497
PQBP1	SIMILAR TO POLYGLUTAMINE BINDING PROTEIN 1	NM_001013957	A_42_P700879	0.528748	0.00134309	GE17303	NA	NA
ITM2B	INTEGRAL MEMBRANE PROTEIN 2B	NM_001006963	A_42_P688583	0.659373	0.00132603	GE1135235	-0.0662763	0.7819
CRK	V-CRK SARCOMA VIRUS CT10 ONCOGENE HOMOLOG (AVIAN)	NM_019302	A_43_P12013	-0.584227	0.000296944	GE20648	NA	NA
ITM2B	INTEGRAL MEMBRANE PROTEIN 2B	NM_001006963	A_42_P688583	0.659373	0.00132603	GE1184222	-0.0191704	0.8735
GRK1	G PROTEIN-COUPLED RECEPTOR KINASE 1	NM_031096	A_43_P12511	-0.728062	0.00083419	GE1109706	NA	NA
PGK1	PHOSPHOGLYCERATE KINASE 1	NM_053291	A_43_P12754	-0.651861	0.00277395	GE1319689	NA	NA
RAN	RAN, MEMBER RAS ONCOGENE FAMILY	NM_053439	A_43_P12806	0.393868	0.00246753	GE17115	-0.146403	0.3739
LCP1	LYMPHOCYTE CYTOSOLIC PROTEIN 1	NM_001012044	A_43_P11353	0.275135	0.459943	GE17594	5.09349	0.0001
MDH1	MALATE DEHYDROGENASE 1, NAD (SOLUBLE)	NM_033235	A_43_P12734	0.662539	0.0034588	GE1270098	NA	NA
NOS2	NITRIC OXIDE SYNTHASE 2, INDUCIBLE	NM_012611	A_43_P11486	-0.788991	0.00446401	GE21948	NA	NA
TMED2	COATED VESICLE MEMBRANE PROTEIN	NM_031722	A_43_P12649	0.792066	0.00042296	GE13762	NA	NA
GLUD1	GLUTAMATE DEHYDROGENASE 1	NM_012570	A_43_P14157	0.781013	0.00468297	GE1165677	0.276794	0.1561
MESDC2	MESODERM DEVELOPMENT CANDIATE 2	NM_001008345	A_43_P21324	0.730863	0.00101467	GE1106909	NA	NA
MRFAP1	MORF4 FAMILY ASSOCIATED PROTEIN 1	NM_001009264	A_42_P544569	0.595979	0.00212707	GE12227	NA	NA
RUNX3	RUNT-RELATED TRANSCRIPTION FACTOR 3	NM_130425	A_43_P13119	-1.30562	0.00120065	GE1230177	NA	NA
PFKFB2	6-PHOSPHOFRUCTO-2-KINASE/FRUCTOSE-2,6-BIPHOSPHATASE 2	NM_001033964	A_42_P711274	-0.952919	0.000153105	GE1125138	NA	NA
CIT	CITRON	NM_001029911	A_43_P15913	-0.478273	0.000807079	GE21382	NA	NA
PPP1R3C	PROTEIN PHOSPHATASE 1, REGULATORY (INHIBITOR) SUBUNIT 3C	NM_001012072	A_43_P21284	0.644068	1.41051e-05	GE1200276	NA	NA
MYLK2	MYOSIN LIGHT CHAIN KINASE 2, SKELETAL MUSCLE	NM_057209	A_43_P13063	-0.941646	5.61044e-05	GE19576	NA	NA
KCNE1	POTASSIUM VOLTAGE-GATED CHANNEL, ISK-RELATED SUBFAMILY, MEMBER 1	NM_012973	A_42_P635873	-0.391113	0.00600488	GE20093	NA	NA
YWHAG	TYROSINE 3-MONOOXGENASE/TRYPTOPHAN 5-MONOOXGENASE ACTIVATION PROTEIN, GAMMA POLYPEPTIDE	NM_019376	A_43_P14134	0.609358	0.000489005	GE20694	0.120485	0.2979
RAN	RAN, MEMBER RAS ONCOGENE FAMILY	NM_053439	A_43_P12806	0.393868	0.00246753	GE13570	-0.0491584	0.7654
TSPAN3	TETRASPANIN 3	NM_001005547	A_42_P523233	0.487056	0.00134645	GE14368	0.0113525	0.9196
BIN2	BRIDGING INTEGRATOR 2	NM_001012223	A_42_P778347	-0.653239	0.00681792	GE1224452	NA	NA
HIST1H1T	HISTONE 1, H1T	NM_012579	A_43_P15522	-0.639957	0.000722683	GE19835	NA	NA
YWHAQ	TYROSINE 3-MONOOXYGENASE/TRYPTOPHAN 5-MONOOXYGENASE ACTIVATION PROTEIN, THETA POLYPEPTIDE	NM_013053	A_42_P707617	0.866758	0.000723595	GE20142	0.0571383	0.6703
ODZ2	NEURESTIN	NM_020088	A_43_P12062	-1.14903	0.000337159	GE1207679	NA	NA
UNC84A	UNC-84 HOMOLOG A	NM_001007147	A_43_P21660	0.373936	0.00659278	GE1202510	NA	NA
SLC9A1	SOLUTE CARRIER FAMILY 9, MEMBER 1	NM_012652	A_42_P548840	-0.575043	0.000585477	GE1115766	NA	NA
SLC39A6	SOLUTE CARRIER FAMILY 39 (METAL ION TRANSPORTER), MEMBER 6	NM_001024745	A_43_P17307	0.57569	0.00105711	GE1126352	0.270828	0.2318
ARF4	ADP-RIBOSYLATION FACTOR 4	NM_024151	A_43_P12406	0.633893	0.00677148	GE1297401	NA	NA
MGC95208	SIMILAR TO 4930453N24RIK PROTEIN	NM_001005552	A_43_P16972	0.469474	0.00536611	GE14239	NA	NA
NA	NA	NM_001047877	A_43_P20412	-0.521415	0.00137683	GE1287943	NA	NA
LOC56081	CTD-BINDING SR-LIKE RA1	NM_019384	A_43_P12049	-1.49964	0.000166936	GE20699	0.209765	0.5588
PPM2C	PROTEIN PHOSPHATASE 2C, MAGNESIUM DEPENDENT, CATALYTIC SUBUNIT	NM_019372	A_42_P545118	0.717296	0.000820067	GE20692	0.594835	0.2374
BRD2	BROMODOMAIN-CONTAINING 2	NM_212495	A_43_P16514	-0.542118	0.00386127	GE15558	NA	NA
CYP2D4V1	CYTOCHROME P450, FAMILY 2, SUBFAMILY D, POLYPEPTIDE 22	NM_138515	A_43_P13283	-0.965614	0.000980912	GE1259381	0.191184	0.3652
HOMER2	HOMER HOMOLOG 2 (DROSOPHILA)	NM_053309	A_43_P12759	0.34044	0.00510308	GE1134424	NA	NA
GALNT11	UDP-N-ACETYL-ALPHA-D-GALACTOSAMINE:POLYPEPTIDE N-ACETYLGALACTOSAMINYLTRANSFERASE 11 (GALNAC-T11)	NM_199393	A_42_P535743	0.724614	0.000116505	GE14608	0.00475306	0.9738
CSF2RB1	COLONY STIMULATING FACTOR 2 RECEPTOR, BETA 1, LOW-AFFINITY (GRANULOCYTE-MACROPHAGE)	NM_133555	A_43_P13211	-0.485858	0.00572272	GE15759	NA	NA
RGD69425	UBIQUITIN-CONJUGATING ENZYME E2D 2	NM_031001	A_42_P691460	-0.552512	0.00439888	GE1160102	NA	NA
NTRK2	NEUROTROPHIC TYROSINE KINASE, RECEPTOR, TYPE 2	NM_012731	A_43_P10774	0.621022	0.000226452	GE1122318	NA	NA
MYOD1	MYOGENIC DIFFERENTIATION 1	NM_176079	A_43_P20249	-0.889577	0.00453411	GE1170299	NA	NA
PDE8A	PHOSPHODIESTERASE 8A	NM_198767	A_43_P20574	-0.521827	0.00110614	GE1293463	NA	NA
MARK1	MAP/MICROTUBULE AFFINITY-REGULATING KINASE 1	NM_053947	A_43_P12990	0.743421	3.29913e-05	GE21226	NA	NA
ADK	ADENOSINE KINASE	NM_012895	A_43_P11606	0.619469	9.42598e-05	GE1296212	NA	NA
APOE	APOLIPOPROTEIN E	NM_138828	A_43_P13298	-1.54522	0.000101088	GE21632	NA	NA
MESDC2	MESODERM DEVELOPMENT CANDIATE 2	NM_001008345	A_43_P21324	0.730863	0.00101467	GE1197477	NA	NA
HYOU1	HYPOXIA UP-REGULATED 1	NM_001034028	A_43_P13313	-0.409249	0.00116709	GE21976	NA	NA
FN1	FIBRONECTIN 1	NM_019143	A_42_P774977	0.762224	0.000128456	GE22044	NA	NA
YWHAQ	TYROSINE 3-MONOOXYGENASE/TRYPTOPHAN 5-MONOOXYGENASE ACTIVATION PROTEIN, THETA POLYPEPTIDE	NM_013053	A_42_P707617	0.866758	0.000723595	GE1209601	NA	NA
M6PR	CATION-DEPENDENT MANNOSE-6-PHOSPHATE RECEPTOR	NM_001007700	A_43_P14481	0.851459	0.00252253	GE1205790	0.223299	0.1354
CD47	CD47 ANTIGEN (RH-RELATED ANTIGEN, INTEGRIN-ASSOCIATED SIGNAL TRANSDUCER)	NM_019195	A_43_P11971	-0.674679	0.000566983	GE1160254	NA	NA
PGK1	PHOSPHOGLYCERATE KINASE 1	NM_053291	A_43_P12754	-0.651861	0.00277395	GE1319771	NA	NA
AZI2	5-AZACYTIDINE INDUCED GENE 2	NM_001025705	A_42_P524676	0.45954	8.85239e-05	GE1155588	NA	NA
BRD2	BROMODOMAIN-CONTAINING 2	NM_212495	A_43_P16514	-0.542118	0.00386127	GE1110723	NA	NA
CATNA1	CATENIN (CADHERIN-ASSOCIATED PROTEIN), ALPHA 1, 102KDA	NM_001007145	A_43_P19010	0.714674	5.4919e-05	GE1273318	NA	NA
PGRMC1	PROGESTERONE RECEPTOR MEMBRANE COMPONENT 1	NM_021766	A_42_P674786	0.525014	0.004822	GE1285080	NA	NA
GNA12	GUANINE NUCLEOTIDE BINDING PROTEIN, ALPHA 12	NM_031034	A_43_P15312	0.461145	0.00311779	GE19531	0.128425	0.6211
RGD1305984	SIMILAR TO RIKEN CDNA 2610528A15	NM_001034093	A_43_P18334	0.419645	0.00289584	GE1178055	NA	NA
GNA12	GUANINE NUCLEOTIDE BINDING PROTEIN, ALPHA 12	NM_031034	A_43_P15312	0.461145	0.00311779	GE17137	NA	NA
DYNLL1	DYNEIN, CYTOPLASMIC, LIGHT CHAIN 1	NM_053319	A_43_P14864	0.663902	0.00121208	GE22022	0.0311128	0.7974
KLHL7	KELCH-LIKE 7 (DROSOPHILA)	NM_001012187	A_42_P455053	0.653604	0.00141374	GE1229550	NA	NA
NR2F2	NUCLEAR RECEPTOR SUBFAMILY 2, GROUP F, MEMBER 2	NM_080778	A_43_P13085	-0.704858	1.23309e-05	GE1183516	NA	NA
TPM3	TROPOMYOSIN 3, GAMMA	NM_057208	A_43_P13062	-0.626677	0.00030566	GE1268982	0.128425	0.4106
PTDSS1	PHOSPHATIDYLSERINE SYNTHASE 1	NM_001012113	A_43_P18150	0.692423	2.3499e-06	GE1203895	NA	NA
NTRK2	NEUROTROPHIC TYROSINE KINASE, RECEPTOR, TYPE 2	NM_012731	A_43_P10774	0.621022	0.000226452	GE1102337	NA	NA
NUDT3	NUDIX (NUCLEOTIDE DIPHOSPHATE LINKED MOIETY X)-TYPE MOTIF 3	NM_001024243	A_43_P11323	-0.415391	0.00316958	GE1189965	NA	NA
JIK	JNK/SAPK-INHIBITORY KINASE	NM_001024254	A_43_P21800	-0.499695	0.000454545	GE1120886	NA	NA
TPM3	TROPOMYOSIN 3, GAMMA	NM_057208	A_43_P13062	-0.626677	0.00030566	GE15574	-0.0744562	0.6086
IGF2R	INSULIN-LIKE GROWTH FACTOR 2 RECEPTOR	NM_012756	A_43_P11548	0.590604	0.00448617	GE1256196	NA	NA
NFKBIB	NUCLEAR FACTOR OF KAPPA LIGHT CHAIN GENE ENHANCER IN B-CELLS INHIBITOR, BETA	NM_030867	A_43_P12463	-0.544801	0.00635494	GE1251946	NA	NA
PDZK3	PDZ DOMAIN CONTAINING 3	NM_022940	A_42_P709226	-0.363453	0.00466167	GE1208688	NA	NA
ATP6V0C	ATPASE, H+ TRANSPORTING, V0 SUBUNIT C	NM_130823	A_42_P545209	0.586085	0.00627777	GE1184872	NA	NA
NTF3	NEUROTROPHIN 3	NM_031073	A_43_P12501	-1.24807	0.000199704	GE1102322	NA	NA
GKAP1	G KINASE ANCHORING PROTEIN 1	NM_001012160	A_43_P14355	-0.640227	0.000668322	GE1206517	NA	NA
BRD2	BROMODOMAIN-CONTAINING 2	NM_212495	A_43_P16514	-0.542118	0.00386127	GE1289543	-0.247937	0.1335
TNP2	TRANSITION PROTEIN 2	NM_017057	A_43_P11798	-0.582941	0.000383613	GE1285790	NA	NA
ERRFI1	SIMILAR TO MITOGEN-INDUCIBLE GENE 6 PROTEIN HOMOLOG (MIG-6) (GENE 33 POLYPEPTIDE)	NM_001014071	A_43_P14882	0.658002	0.000327005	GE1199910	NA	NA
DUSP5	DUAL SPECIFICITY PHOSPHATASE 5	NM_133578	A_42_P739860	0.588416	0.00374984	GE1269116	NA	NA
IGF2R	INSULIN-LIKE GROWTH FACTOR 2 RECEPTOR	NM_012756	A_43_P11548	0.590604	0.00448617	GE1163060	NA	NA
MAP2K1	MITOGEN ACTIVATED PROTEIN KINASE KINASE 1	NM_031643	A_42_P638191	0.795624	0.000877135	GE1192993	NA	NA
ABHD14A	SIMILAR TO DORZ1	NM_001009670	A_43_P23127	-0.594438	0.00459863	GE13996	NA	NA
SLC9A1	SOLUTE CARRIER FAMILY 9, MEMBER 1	NM_012652	A_42_P548840	-0.575043	0.000585477	GE1269150	NA	NA
EPN2	EPSIN 2	NM_001033914	A_43_P12133	-1.02106	1.64389e-05	GE1296078	NA	NA
TCF2	TRANSCRIPTION FACTOR 2	NM_013103	A_43_P11714	-0.752753	0.0026031	GE20177	NA	NA
PPP3R2	PROTEIN PHOSPHATASE 3, REGULATORY SUBUNIT B, ALPHA ISOFORM (CALCINEURIN B, TYPE II)	NM_021701	A_42_P626467	0.29207	0.00640875	GE20783	NA	NA
TSG101	TUMOR SUSCEPTIBILITY GENE 101	NM_181628	A_42_P586361	0.500979	0.000340775	GE15743	NA	NA
GLUD1	GLUTAMATE DEHYDROGENASE 1	NM_012570	A_43_P14157	0.781013	0.00468297	GE1150205	NA	NA
NUDC	NUCLEAR DISTRIBUTION GENE C HOMOLOG (ASPERGILLUS)	NM_017271	A_43_P14924	0.474752	0.00641464	GE20464	0.106348	0.4822
RGD69425	UBIQUITIN-CONJUGATING ENZYME E2D 2	NM_031001	A_42_P691460	-0.552512	0.00439888	GE20970	NA	NA
MAP2K1	MITOGEN ACTIVATED PROTEIN KINASE KINASE 1	NM_031643	A_42_P638191	0.795624	0.000877135	GE22249	-0.188693	0.203
HIBCH	3-HYDROXYISOBUTYRYL-COENZYME A HYDROLASE	NM_001013112	A_42_P532368	0.667381	0.000449573	GE15212	NA	NA
LRP16	LRP16 PROTEIN	NM_139337	A_43_P15369	-1.4411	3.56871e-06	GE1192957	NA	NA
MGC112830	SIMILAR TO TRANSCRIPTION FACTOR	NM_001025718	A_42_P555710	0.434869	0.000744412	GE1109015	NA	NA
RPS9	RIBOSOMAL PROTEIN S9	NM_031108	A_43_P12515	-0.602878	0.00468344	GE21124	0.178109	0.2041
CRK	V-CRK SARCOMA VIRUS CT10 ONCOGENE HOMOLOG (AVIAN)	NM_019302	A_43_P12013	-0.584227	0.000296944	GE21604	NA	NA
