# Supplementary material for: A Systems Level, Functional Genomics Analysis of Chronic Epilepsy
Source: PLoS One. 2011 Jun 14;6(6):e20763. doi: 10.1371/journal.pone.0020763 (PMC3114768; doi:10.1371/journal.pone.0020763)
Supplement: Table S9 — Functional annotation of the module associated with the effect of seizures. Enriched GO categories for the genes present within the blue module that corresponded to both hippocampi that were subject to seizures. The first column shows whether the categories are associated with a biological process, cellular component, or molecular function. Specific, enriched functional categories are shown in the second column. The third and fourth columns show the number and percentage of genes in the module that are associated with the specific term. The fifth column shows enrichment p-value. (XLS) [file pone.0020763.s011.xls]

## Sheet: Sheet1
Category	GOID	Term	Count	%	PValue
GOTERM_BP_5	GO:0046907	intracellular transport	22	0.1486	9.81578e-08
GOTERM_BP_5	GO:0006886	intracellular protein transport	17	0.1149	1.76976e-07
GOTERM_BP_5	GO:0015031	protein transport	19	0.1284	8.54171e-07
GOTERM_BP_5	GO:0006605	protein targeting	9	0.0608	0.00052508
GOTERM_BP_5	GO:0006164	purine nucleotide biosynthetic process	5	0.0338	0.00579371
GOTERM_BP_5	GO:0009117	nucleotide metabolic process	7	0.0473	0.0133041
GOTERM_BP_5	GO:0007243	protein kinase cascade	9	0.0608	0.0142512
GOTERM_BP_5	GO:0016071	mRNA metabolic process	6	0.0405	0.0186722
GOTERM_BP_5	GO:0006457	protein folding	6	0.0405	0.0234161
GOTERM_BP_5	GO:0048193	Golgi vesicle transport	4	0.027	0.04541
GOTERM_BP_5	GO:0006464	protein modification process	19	0.1284	0.0456975
GOTERM_BP_5	GO:0007268	synaptic transmission	8	0.0541	0.0472581
GOTERM_BP_5	GO:0045045	secretory pathway	6	0.0405	0.0686946
GOTERM_BP_5	GO:0006888	ER to Golgi vesicle-mediated transport	3	0.0203	0.0716545
GOTERM_BP_5	GO:0030163	protein catabolic process	5	0.0338	0.0752883
GOTERM_BP_5	GO:0009142	nucleoside triphosphate biosynthetic process	3	0.0203	0.0995122
GOTERM_CC_5	GO:0005737	cytoplasm	54	0.3649	0.000261064
GOTERM_CC_5	GO:0005829	cytosol	13	0.0878	0.00326298
GOTERM_CC_5	GO:0043231	intracellular membrane-bound organelle	56	0.3784	0.00663799
GOTERM_CC_5	GO:0044444	cytoplasmic part	39	0.2635	0.00971995
GOTERM_CC_5	GO:0043229	intracellular organelle	62	0.4189	0.0164525
GOTERM_CC_5	GO:0044428	nuclear part	12	0.0811	0.0646053
GOTERM_CC_5	GO:0005783	endoplasmic reticulum	10	0.0676	0.073445
GOTERM_MF_5	GO:0001784	phosphotyrosine binding	3	0.0203	0.00146185
GOTERM_MF_5	GO:0016462	pyrophosphatase activity	12	0.0811	0.00670909
GOTERM_MF_5	GO:0019787	small conjugating protein ligase activity	6	0.0405	0.00690001
GOTERM_MF_5	GO:0016791	phosphoric monoester hydrolase activity	7	0.0473	0.0118617
GOTERM_MF_5	GO:0032561	guanyl ribonucleotide binding	8	0.0541	0.0150656
GOTERM_MF_5	GO:0008426	protein kinase C inhibitor activity	2	0.0135	0.0336346
GOTERM_MF_5	GO:0051920	peroxiredoxin activity	2	0.0135	0.0581256
GOTERM_MF_5	GO:0032559	adenyl ribonucleotide binding	17	0.1149	0.0638005
